# Supplementary material for: Epstein-Barr virus LMP1 modulates the CD63 interactome
Source: Preprints.org preprint supplement (doi:10.20944/preprints202102.0494.v1), 2021-02-22
Supplement: Supplementary file 3 [file Dataset 2 (CD63 interacting proteins).xlsx]

## Sheet: Sheet1
#	CD63 interacting proteins(minus unbinding proteins)	Accession Number	Accession Number	Molecular Weight	T-Test (p-value): (p < 0.05)	Fold Change by Category	Quantitative Profile	Untransfected_1	Untransfected_2	Untransfected_3	Untranfect(1+2+3)	CD63_BirA_1	CD63_BirA_2	CD63_BirA_3	CD63_BirA(1+2+3)	CD63_BirA /Untransfected	CD63_BirA+LMP1_1	CD63_BirA+LMP1_2	CD63_BirA+LMP1_3	CD63CT+LMP1 added	CD63_BirA+LMP1/Untransfected
589	Proteasome subunit beta type-6 OS=Homo sapiens GN=PSMB6 PE=1 SV=4	PSB6_HUMAN	PSB6	25 kDa	0.45	6.7	[]		2		2	3	0		3	1.5	20		0	20	10
1064	ATP-dependent Clp protease ATP-binding subunit clpX-like, mitochondrial OS=Homo sapiens GN=CLPX PE=1 SV=2	CLPX_HUMAN	CLPX	69 kDa	0.67	1.8	[]	0		2	2	1	0	10	11	5.5	18	0	2	20	10
114	Transcription activator BRG1 OS=Homo sapiens GN=SMARCA4 PE=1 SV=2	SMCA4_HUMAN	SMCA4	185 kDa	0.26	5.5	[]	0	1	0	1	0	0	2	2	2	8	1	2	11	11
1117	Cofilin-1 OS=Homo sapiens GN=CFL1 PE=1 SV=3	COF1_HUMAN	COF1	19 kDa	0.69	1.9	[]	13	1	0	14	82	0	2	84	6	155	0	3	158	11.2857
1302	Pyruvate dehydrogenase E1 component subunit alpha, somatic form, mitochondrial OS=Homo sapiens GN=PDHA1 PE=1 SV=3	ODPA_HUMAN	ODPA	43 kDa	0.78	1.4	[]			8	8	20	0	45	65	8.125	89	0	4	93	11.625
1174	Insulin-like growth factor 2 mRNA-binding protein 1 OS=Homo sapiens GN=IGF2BP1 PE=1 SV=2	IF2B1_HUMAN	IF2B1	63 kDa	0.72	1.4	[]	0	14	14	28	99	60	72	231	8.25	271	13	42	326	11.6429
963	Elongation factor Ts, mitochondrial OS=Homo sapiens GN=TSFM PE=1 SV=2	EFTS_HUMAN	EFTS	35 kDa	0.62	2	[]	0		7	7	31	5	6	42	6	76		7	83	11.8571
471	Exocyst complex component 8 OS=Homo sapiens GN=EXOC8 PE=1 SV=2	EXOC8_HUMAN	EXOC8	82 kDa	0.41	12	[]	1	0	0	1	0	1		1	1	12		0	12	12
1209	Serine/arginine-rich splicing factor 3 OS=Homo sapiens GN=SRSF3 PE=1 SV=1	SRSF3_HUMAN	SRSF3	19 kDa	0.74	1.7	[]	2		0	2	17			17	8.5	29			29	14.5
1018	Poly(rC)-binding protein 2 OS=Homo sapiens GN=PCBP2 PE=1 SV=1	PCBP2_HUMAN	PCBP2	39 kDa	0.65	1.8	[]	23	4	8	35	165	103	33	301	8.6	510	11	27	548	15.6571
504	Gamma-glutamylcyclotransferase OS=Homo sapiens GN=GGCT PE=1 SV=1	GGCT_HUMAN	GGCT	21 kDa	0.42	4	[]	0	0	1	1		1	3	4	4	14	2	0	16	16
743	60S ribosomal protein L35a OS=Homo sapiens GN=RPL35A PE=1 SV=2	RL35A_HUMAN	RL35A	13 kDa	0.51	3.8	[]	4			4	17	0		17	4.25	65			65	16.25
440	Structural maintenance of chromosomes flexible hinge domain-containing protein 1 OS=Homo sapiens GN=SMCHD1 PE=1 SV=2	SMHD1_HUMAN	SMHD1	226 kDa	0.4	17	[]	1		0	1	1	0	0	1	1	17	0	0	17	17
909	Arf-GAP with Rho-GAP domain, ANK repeat and PH domain-containing protein 1 OS=Homo sapiens GN=ARAP1 PE=1 SV=3	ARAP1_HUMAN	ARAP1	162 kDa	0.6	1.9	[]	0	1	0	1	7	0	2	9	9	14	1	2	17	17
697	Peroxiredoxin-5, mitochondrial OS=Homo sapiens GN=PRDX5 PE=1 SV=4	PRDX5_HUMAN	PRDX5	22 kDa	0.5	4.3	[]	3			3	14			14	4.66667	60			60	20
268	Fibronectin OS=Homo sapiens GN=FN1 PE=1 SV=4	FINC_HUMAN	FINC	263 kDa	0.37	3.2	[]	3	0	0	3	19	0	0	19	6.33333	17	42	1	60	20
728	Heterogeneous nuclear ribonucleoprotein A1 OS=Homo sapiens GN=HNRNPA1 PE=1 SV=5	ROA1_HUMAN	ROA1	39 kDa	0.51	2.6	[]	3	4	1	8	51	13	1	65	8.125	151	13	8	172	21.5
778	3-hydroxyacyl-CoA dehydrogenase type-2 OS=Homo sapiens GN=HSD17B10 PE=1 SV=3	HCD2_HUMAN	HCD2	27 kDa	0.53	3.3	[]			5	5	27	1	8	36	7.2	118		0	118	23.6
629	Ornithine aminotransferase, mitochondrial OS=Homo sapiens GN=OAT PE=1 SV=1	OAT_HUMAN	OAT	49 kDa	0.47	3.6	[]		0	2	2	3		13	16	8	52	1	4	57	28.5
374	Apolipoprotein B-100 OS=Homo sapiens GN=APOB PE=1 SV=2	APOB_HUMAN	APOB	516 kDa	0.37	24	[]	0	1	0	1	2	1	0	3	3	2	70	0	72	72
265	Threonine--tRNA ligase, cytoplasmic OS=Homo sapiens GN=TARS PE=1 SV=3	SYTC_HUMAN	SYTC	83 kDa	0.37	12	[]	2	0	0	2	9	5	1	15	7.5	165	2	10	177	88.5
1337	Acetyl-CoA acetyltransferase, mitochondrial OS=Homo sapiens GN=ACAT1 PE=1 SV=1	THIL_HUMAN	THIL	45 kDa	0.8	1.4	[]	0		4	4	31	1	6	38	9.5	49		4	53	13.25
901	AFG3-like protein 2 OS=Homo sapiens GN=AFG3L2 PE=1 SV=2	AFG32_HUMAN	AFG32	89 kDa	0.59	2	[]	0		3	3	12		17	29	9.66667	51	0	7	58	19.3333
1068	60S ribosomal protein L18 OS=Homo sapiens GN=RPL18 PE=1 SV=2	RL18_HUMAN	RL18	22 kDa	0.67	1.8	[]	10	1	3	14	59	34	46	139	9.92857	238	2	6	246	17.5714
1563	Ankyrin-3 OS=Homo sapiens GN=ANK3 PE=1 SV=3	ANK3_HUMAN	ANK3	480 kDa	0.94	0.9	[]	1	0	0	1	10	0	0	10	10	8	1	0	9	9
531	ADP-ribosylation factor-like protein 8B OS=Homo sapiens GN=ARL8B PE=1 SV=1	ARL8B_HUMAN	ARL8B	22 kDa	0.43	4.6	[]	1	0	0	1	9		1	10	10	42	0	4	46	46
667	Medium-chain specific acyl-CoA dehydrogenase, mitochondrial OS=Homo sapiens GN=ACADM PE=1 SV=1	ACADM_HUMAN	ACADM	47 kDa	0.49	4.4	[]	1		0	1	4		6	10	10	44		0	44	44
1500	Heterogeneous nuclear ribonucleoprotein D-like OS=Homo sapiens GN=HNRNPDL PE=1 SV=3	HNRDL_HUMAN	HNRDL	46 kDa	0.9	1.2	[]	0		5	5	39	9	2	50	10	54	0	4	58	11.6
115	14-3-3 protein epsilon OS=Homo sapiens GN=YWHAE PE=1 SV=1	1433E_HUMAN	1433E	29 kDa	0.26	0.4	[]	0	10	7	17	85	73	12	170	10	34	4	35	73	4.29412
1348	Heat shock cognate 71 kDa protein OS=Homo sapiens GN=HSPA8 PE=1 SV=1	HSP7C_HUMAN	HSP7C	71 kDa	0.81	1.1	[]	11	52	26	89	379	324	210	913	10.2584	508	245	218	971	10.9101
1055	DNA repair protein RAD50 OS=Homo sapiens GN=RAD50 PE=1 SV=1	RAD50_HUMAN	RAD50	154 kDa	0.67	0.7	[]	7	0	0	7	10	46	16	72	10.2857	40	0	9	49	7
1322	40S ribosomal protein S26 OS=Homo sapiens GN=RPS26 PE=1 SV=3	RS26_HUMAN	RS26	13 kDa	0.79	1.5	[]	4	4	2	10	100		4	104	10.4	151		3	154	15.4
1217	60S ribosomal protein L8 OS=Homo sapiens GN=RPL8 PE=1 SV=2	RL8_HUMAN	RL8	28 kDa	0.75	0.8	[]	2	8	19	29	105	128	70	303	10.4483	170	18	65	253	8.72414
719	Phosphoglycerate kinase 1 OS=Homo sapiens GN=PGK1 PE=1 SV=3	PGK1_HUMAN	PGK1	45 kDa	0.51	4	[]	2			2	21	0	0	21	10.5	85	0	0	85	42.5
1504	60S ribosomal protein L18a OS=Homo sapiens GN=RPL18A PE=1 SV=2	RL18A_HUMAN	RL18A	21 kDa	0.91	1.1	[]	22	7	1	30	252	37	26	315	10.5	305	15	40	360	12
1124	ATPase family AAA domain-containing protein 3A OS=Homo sapiens GN=ATAD3A PE=1 SV=2	ATD3A_HUMAN	ATD3A	71 kDa	0.7	1.5	[]	0	0	6	6	23	7	34	64	10.6667	73	0	20	93	15.5
981	Metal transporter CNNM4 OS=Homo sapiens GN=CNNM4 PE=1 SV=3	CNNM4_HUMAN	CNNM4	87 kDa	0.63	0.5	[]	1	0	0	1	11			11	11	4	1	0	5	5
191	Ubiquitin-like modifier-activating enzyme 1 OS=Homo sapiens GN=UBA1 PE=1 SV=3	UBA1_HUMAN	UBA1	118 kDa	0.32	15	[]	1	0	0	1	8	1	2	11	11	146	4	15	165	165
1396	Protein transport protein Sec31A OS=Homo sapiens GN=SEC31A PE=1 SV=3	SC31A_HUMAN	SC31A	133 kDa	0.84	0.8	[]	1			1	3	7	1	11	11	8	0	1	9	9
1323	Trifunctional enzyme subunit beta, mitochondrial OS=Homo sapiens GN=HADHB PE=1 SV=3	ECHB_HUMAN	ECHB	51 kDa	0.79	1.4	[]	0		2	2	13	2	7	22	11	28	0	2	30	15
919	Succinyl-CoA ligase [ADP/GDP-forming] subunit alpha, mitochondrial OS=Homo sapiens GN=SUCLG1 PE=1 SV=4	SUCA_HUMAN	SUCA	36 kDa	0.6	1.5	[]		0	2	2	3	11	8	22	11	21		12	33	16.5
1544	Ribonuclease inhibitor OS=Homo sapiens GN=RNH1 PE=1 SV=2	RINI_HUMAN	RINI	50 kDa	0.93	1.1	[]			5	5	30	4	21	55	11	61	0		61	12.2
868	Elongation factor 2 OS=Homo sapiens GN=EEF2 PE=1 SV=4	EF2_HUMAN	EF2	95 kDa	0.58	1.7	[]	46	43	11	100	501	390	220	1111	11.11	1422	85	355	1862	18.62
874	T-complex protein 1 subunit eta OS=Homo sapiens GN=CCT7 PE=1 SV=2	TCPH_HUMAN	TCPH	59 kDa	0.58	1.6	[]	0	15	0	15	56	77	39	172	11.4667	195		80	275	18.3333
856	Protein DENND6A OS=Homo sapiens GN=DENND6A PE=1 SV=1	DEN6A_HUMAN	DEN6A	70 kDa	0.57	0.4	[]	0	1	1	2	21	1	1	23	11.5	8	1	1	10	5
1038	Eukaryotic translation initiation factor 2 subunit 1 OS=Homo sapiens GN=EIF2S1 PE=1 SV=3	IF2A_HUMAN	IF2A	36 kDa	0.66	1.5	[]		2	4	6	7	46	16	69	11.5	72	1	30	103	17.1667
499	40S ribosomal protein S4, X isoform OS=Homo sapiens GN=RPS4X PE=1 SV=2	RS4X_HUMAN	RS4X	30 kDa	0.42	0.7	[]	5	15	12	32	135	132	105	372	11.625	162	22	75	259	8.09375
1171	2,4-dienoyl-CoA reductase, mitochondrial OS=Homo sapiens GN=DECR1 PE=1 SV=1	DECR_HUMAN	DECR	36 kDa	0.72	1.4	[]		0	1	1	8	2	2	12	12	13	0	4	17	17
1554	60S ribosomal protein L17 OS=Homo sapiens GN=RPL17 PE=1 SV=3	RL17_HUMAN	RL17	21 kDa	0.94	0.9	[]	5	1	6	12	99	27	20	146	12.1667	122		12	134	11.1667
922	Non-POU domain-containing octamer-binding protein OS=Homo sapiens GN=NONO PE=1 SV=4	NONO_HUMAN	NONO	54 kDa	0.61	1.4	[]	0	11	5	16	64	81	53	198	12.375	199	30	58	287	17.9375
451	Heat shock 70 kDa protein 6 OS=Homo sapiens GN=HSPA6 PE=1 SV=2	HSP76_HUMAN	HSP76	71 kDa	0.4	2.1	[]	26		56	82	317	385	316	1018	12.4146	1170	299	317	1786	21.7805
242	T-complex protein 1 subunit zeta OS=Homo sapiens GN=CCT6A PE=1 SV=3	TCPZ_HUMAN	TCPZ	58 kDa	0.35	0.6	[]		5	10	15	35	81	78	194	12.9333	63	4	53	120	8
1074	Mitogen-activated protein kinase kinase kinase kinase 5 OS=Homo sapiens GN=MAP4K5 PE=1 SV=1	M4K5_HUMAN	M4K5	95 kDa	0.68	1.6	[]	1	0	0	1	13			13	13	7	14		21	21
1062	Pyruvate dehydrogenase E1 component subunit beta, mitochondrial OS=Homo sapiens GN=PDHB PE=1 SV=3	ODPB_HUMAN	ODPB	39 kDa	0.67	1.5	[]	0		4	4	15	20	17	52	13	65	3	11	79	19.75
1457	Guanine nucleotide-binding protein subunit alpha-13 OS=Homo sapiens GN=GNA13 PE=1 SV=2	GNA13_HUMAN	GNA13	44 kDa	0.88	0.9	[]	0	4	5	9	74	23	22	119	13.2222	81	13	11	105	11.6667
609	Adenine phosphoribosyltransferase OS=Homo sapiens GN=APRT PE=1 SV=2	APT_HUMAN	APT	20 kDa	0.45	2.7	[]		4		4	27	20	6	53	13.25	120		25	145	36.25
1461	Endophilin-A2 OS=Homo sapiens GN=SH3GL1 PE=1 SV=1	SH3G1_HUMAN	SH3G1	41 kDa	0.88	0.9	[]	2	1	3	6	55	23	3	81	13.5	40	29	3	72	12
1465	Ubiquitin thioesterase OTUB1 OS=Homo sapiens GN=OTUB1 PE=1 SV=2	OTUB1_HUMAN	OTUB1	31 kDa	0.88	1.1	[]	2	2	0	4	27	20	8	55	13.75	53		10	63	15.75
1584	60S ribosomal protein L21 OS=Homo sapiens GN=RPL21 PE=1 SV=2	RL21_HUMAN	RL21	19 kDa	0.96	1.1	[]	8	0	4	12	139	14	14	167	13.9167	166		13	179	14.9167
708	ATP-binding cassette sub-family F member 2 OS=Homo sapiens GN=ABCF2 PE=1 SV=2	ABCF2_HUMAN	ABCF2	71 kDa	0.5	3.9	[]	1	0		1	3	7	4	14	14	54	0		54	54
1458	78 kDa glucose-regulated protein OS=Homo sapiens GN=HSPA5 PE=1 SV=2	GRP78_HUMAN	GRP78	72 kDa	0.88	0.9	[]	3	15	10	28	172	153	68	393	14.0357	221	121	103	445	15.8929
1414	Spermidine synthase OS=Homo sapiens GN=SRM PE=1 SV=1	SPEE_HUMAN	SPEE	34 kDa	0.85	1.2	[]		1	5	6	31	40	15	86	14.3333	84		18	102	17
1151	ATP-dependent RNA helicase DDX3X OS=Homo sapiens GN=DDX3X PE=1 SV=3	DDX3X_HUMAN	DDX3X	73 kDa	0.71	1.3	[]	7	13	13	33	192	139	142	473	14.3333	486	65	87	638	19.3333
598	116 kDa U5 small nuclear ribonucleoprotein component OS=Homo sapiens GN=EFTUD2 PE=1 SV=1	U5S1_HUMAN	U5S1	109 kDa	0.45	2.3	[]	4	0	0	4	12	28	21	61	15.25	66	0	40	106	26.5
769	Proliferating cell nuclear antigen OS=Homo sapiens GN=PCNA PE=1 SV=1	PCNA_HUMAN	PCNA	29 kDa	0.53	2.3	[]	0	1	2	3	19	19	9	47	15.6667	94	1	13	108	36
1632	Activator of 90 kDa heat shock protein ATPase homolog 1 OS=Homo sapiens GN=AHSA1 PE=1 SV=1	AHSA1_HUMAN	AHSA1	38 kDa	0.98	1	[]	2	5	1	8	59	49	20	128	16	101	13	12	126	15.75
1287	Inorganic pyrophosphatase OS=Homo sapiens GN=PPA1 PE=1 SV=2	IPYR_HUMAN	IPYR	33 kDa	0.77	0.8	[]	1	3	2	6	35	56	6	97	16.1667	55	0	22	77	12.8333
1589	CAD protein OS=Homo sapiens GN=CAD PE=1 SV=3	PYR1_HUMAN	PYR1	243 kDa	0.96	1	[]	8	23	13	44	207	191	343	741	16.8409	654	4	118	776	17.6364
1653	Calponin-3 OS=Homo sapiens GN=CNN3 PE=1 SV=1	CNN3_HUMAN	CNN3	36 kDa	1	1	[]	0	6	2	8	51	64	21	136	17	67	46	23	136	17
1528	rRNA 2'-O-methyltransferase fibrillarin OS=Homo sapiens GN=FBL PE=1 SV=2	FBRL_HUMAN	FBRL	34 kDa	0.92	1.1	[]	8	0	1	9	64	62	28	154	17.1111	125	7	34	166	18.4444
660	Sorting nexin-17 OS=Homo sapiens GN=SNX17 PE=1 SV=1	SNX17_HUMAN	SNX17	53 kDa	0.48	0.3	[]	0	1	0	1	16	0	2	18	18	4	2	0	6	6
1307	Mitotic checkpoint protein BUB3 OS=Homo sapiens GN=BUB3 PE=1 SV=1	BUB3_HUMAN	BUB3	37 kDa	0.79	1.4	[]	0	3	0	3	23	24	7	54	18	69		5	74	24.6667
1128	Phosphoribosylformylglycinamidine synthase OS=Homo sapiens GN=PFAS PE=1 SV=4	PUR4_HUMAN	PUR4	145 kDa	0.7	0.7	[]	0	2	3	5	4	45	41	90	18	51		14	65	13
1493	Magnesium transporter protein 1 OS=Homo sapiens GN=MAGT1 PE=1 SV=1	MAGT1_HUMAN	MAGT1	38 kDa	0.9	0.9	[]	2	0	0	2	30	5	2	37	18.5	28	1	3	32	16
731	Pre-mRNA-processing-splicing factor 8 OS=Homo sapiens GN=PRPF8 PE=1 SV=2	PRP8_HUMAN	PRP8	274 kDa	0.51	3.6	[]	1	0	0	1	0	15	4	19	19	67	0	1	68	68
1570	E3 ubiquitin-protein ligase TRIP12 OS=Homo sapiens GN=TRIP12 PE=1 SV=1	TRIPC_HUMAN	TRIPC	220 kDa	0.95	1.1	[]	0	0	1	1	18	1	0	19	19	21	0	0	21	21
386	60S ribosomal protein L13 OS=Homo sapiens GN=RPL13 PE=1 SV=4	RL13_HUMAN	RL13	24 kDa	0.38	0.6	[]		1	2	3	22	16	20	58	19.3333	26		9	35	11.6667
1198	C-1-tetrahydrofolate synthase, cytoplasmic OS=Homo sapiens GN=MTHFD1 PE=1 SV=3	C1TC_HUMAN	C1TC	102 kDa	0.73	0.8	[]	3	9	11	23	112	158	176	446	19.3913	268	1	88	357	15.5217
1178	40S ribosomal protein S6 OS=Homo sapiens GN=RPS6 PE=1 SV=1	RS6_HUMAN	RS6	29 kDa	0.72	0.7	[]	18	0	5	23	295	113	41	449	19.5217	287	4	23	314	13.6522
18	A-kinase anchor protein 1, mitochondrial OS=Homo sapiens GN=AKAP1 PE=1 SV=1	AKAP1_HUMAN	AKAP1	97 kDa	0.093	2	[]	1	0	0	1	7	8	5	20	20	14	18	8	40	40
842	Glutathione S-transferase P OS=Homo sapiens GN=GSTP1 PE=1 SV=2	GSTP1_HUMAN	GSTP1	23 kDa	0.56	2.9	[]		2		2	35	6	0	41	20.5	118	0	0	118	59
1388	Lon protease homolog, mitochondrial OS=Homo sapiens GN=LONP1 PE=1 SV=2	LONM_HUMAN	LONM	106 kDa	0.84	0.8	[]	0	0	3	3	8	0	54	62	20.6667	46	1	0	47	15.6667
647	General transcription factor 3C polypeptide 5 OS=Homo sapiens GN=GTF3C5 PE=1 SV=2	TF3C5_HUMAN	TF3C5	60 kDa	0.48	2.4	[]	1			1	16	3	2	21	21	40		11	51	51
1208	Monofunctional C1-tetrahydrofolate synthase, mitochondrial OS=Homo sapiens GN=MTHFD1L PE=1 SV=1	C1TM_HUMAN	C1TM	106 kDa	0.74	1.4	[]	0	0	2	2	10	7	25	42	21	49	1	9	59	29.5
1310	Thioredoxin-dependent peroxide reductase, mitochondrial OS=Homo sapiens GN=PRDX3 PE=1 SV=3	PRDX3_HUMAN	PRDX3	28 kDa	0.79	1.4	[]	2	1	0	3	37	24	3	64	21.3333	81		7	88	29.3333
690	Heterogeneous nuclear ribonucleoprotein K OS=Homo sapiens GN=HNRNPK PE=1 SV=1	HNRPK_HUMAN	HNRPK	51 kDa	0.49	2.7	[]		4		4	60	20	6	86	21.5	203	16	13	232	58
1076	Far upstream element-binding protein 2 OS=Homo sapiens GN=KHSRP PE=1 SV=4	FUBP2_HUMAN	FUBP2	73 kDa	0.68	0.7	[]	1	9	0	10	57	112	50	219	21.9	124	0	39	163	16.3
841	Nodal modulator 2 OS=Homo sapiens GN=NOMO2 PE=1 SV=1	NOMO2_HUMAN (+1)	NOMO2	139 kDa	0.56	2.7	[]	1		0	1	20		2	22	22	58	2	0	60	60
1577	40S ribosomal protein S25 OS=Homo sapiens GN=RPS25 PE=1 SV=1	RS25_HUMAN	RS25	14 kDa	0.95	0.9	[]	0	1	0	1	22		0	22	22	20			20	20
1333	T-complex protein 1 subunit delta OS=Homo sapiens GN=CCT4 PE=1 SV=4	TCPD_HUMAN	TCPD	58 kDa	0.8	0.9	[]	0	12	7	19	107	134	186	427	22.4737	220	11	142	373	19.6316
1409	Anamorsin OS=Homo sapiens GN=CIAPIN1 PE=1 SV=2	CPIN1_HUMAN	CPIN1	34 kDa	0.85	1.3	[]	1	0	0	1	23	0		23	23	21	8	0	29	29
249	Cytochrome b-c1 complex subunit 1, mitochondrial OS=Homo sapiens GN=UQCRC1 PE=1 SV=3	QCR1_HUMAN	QCR1	53 kDa	0.36	0.5	[]	0	0	2	2	6	21	19	46	23	12	0	11	23	11.5
1455	60S ribosomal protein L24 OS=Homo sapiens GN=RPL24 PE=1 SV=1	RL24_HUMAN	RL24	18 kDa	0.88	1.2	[]	0	0	3	3	46	14	13	73	24.3333	70	0	15	85	28.3333
1033	F-actin-capping protein subunit beta OS=Homo sapiens GN=CAPZB PE=1 SV=4	CAPZB_HUMAN	CAPZB	31 kDa	0.66	0.7	[]		3	5	8	134	55	9	198	24.75	103	6	21	130	16.25
1553	Aldehyde dehydrogenase X, mitochondrial OS=Homo sapiens GN=ALDH1B1 PE=1 SV=3	AL1B1_HUMAN	AL1B1	57 kDa	0.93	0.9	[]	0		1	1	9	2	14	25	25	21	0	2	23	23
1566	Cytosolic acyl coenzyme A thioester hydrolase OS=Homo sapiens GN=ACOT7 PE=1 SV=3	BACH_HUMAN	BACH	42 kDa	0.94	1.1	[]	1	3		4	44	48	9	101	25.25	102	0	10	112	28
1103	Prelamin-A/C OS=Homo sapiens GN=LMNA PE=1 SV=1	LMNA_HUMAN	LMNA	74 kDa	0.68	0.8	[]	0	2	1	3	11	37	28	76	25.3333	40	5	14	59	19.6667
746	Epiplakin OS=Homo sapiens GN=EPPK1 PE=1 SV=2	EPIPL_HUMAN	EPIPL	556 kDa	0.52	2.6	[]	3	2	1	6	52	41	60	153	25.5	348	5	41	394	65.6667
1180	DNA replication licensing factor MCM7 OS=Homo sapiens GN=MCM7 PE=1 SV=4	MCM7_HUMAN	MCM7	81 kDa	0.72	1.3	[]	5	3	5	13	60	146	128	334	25.6923	319	3	121	443	34.0769
1283	Fatty acid synthase OS=Homo sapiens GN=FASN PE=1 SV=3	FAS_HUMAN	FAS	273 kDa	0.77	1.2	[]	6	33	46	85	853	633	716	2202	25.9059	1873	456	336	2665	31.3529
513	S-adenosylmethionine synthase isoform type-2 OS=Homo sapiens GN=MAT2A PE=1 SV=1	METK2_HUMAN	METK2	44 kDa	0.42	0.5	[]		0	2	2	24	7	21	52	26	25		1	26	13
1102	Elongation factor 1-gamma OS=Homo sapiens GN=EEF1G PE=1 SV=3	EF1G_HUMAN	EF1G	50 kDa	0.68	0.8	[]	0	7	9	16	115	187	117	419	26.1875	242	11	70	323	20.1875
1182	Fragile X mental retardation syndrome-related protein 1 OS=Homo sapiens GN=FXR1 PE=1 SV=3	FXR1_HUMAN	FXR1	70 kDa	0.72	1.5	[]	3		0	3	38	28	16	82	27.3333	103	0	16	119	39.6667
603	Eukaryotic translation initiation factor 3 subunit F OS=Homo sapiens GN=EIF3F PE=1 SV=1	EIF3F_HUMAN	EIF3F	38 kDa	0.45	0.6	[]		1	2	3	21	30	31	82	27.3333	41	0	9	50	16.6667
1462	Eukaryotic initiation factor 4A-III OS=Homo sapiens GN=EIF4A3 PE=1 SV=4	IF4A3_HUMAN	IF4A3	47 kDa	0.88	0.9	[]	6	2		8	86	77	56	219	27.375	211		25	236	29.5
684	Golgin subfamily A member 3 OS=Homo sapiens GN=GOLGA3 PE=1 SV=2	GOGA3_HUMAN	GOGA3	167 kDa	0.49	0.3	[]	3	0	0	3	76	5	2	83	27.6667	25	0	0	25	8.33333
1354	Kinesin-like protein KIF1B OS=Homo sapiens GN=KIF1B PE=1 SV=5	KIF1B_HUMAN	KIF1B	204 kDa	0.81	1.4	[]	1	0	0	1	21	1	6	28	28	36		2	38	38
1271	40S ribosomal protein S9 OS=Homo sapiens GN=RPS9 PE=1 SV=3	RS9_HUMAN	RS9	23 kDa	0.77	0.8	[]	5	2	3	10	176	74	31	281	28.1	176	18	23	217	21.7
800	Guanine nucleotide-binding protein G(s) subunit alpha isoforms XLas OS=Homo sapiens GN=GNAS PE=1 SV=2	GNAS1_HUMAN	GNAS1	111 kDa	0.54	2.3	[]		4		4	61	27	25	113	28.25	106	13	17	136	34
82	Hexokinase-1 OS=Homo sapiens GN=HK1 PE=1 SV=3	HXK1_HUMAN	HXK1	102 kDa	0.2	0.3	[]		1	1	2	2	31	24	57	28.5	7	1	8	16	8
732	Microtubule-actin cross-linking factor 1, isoforms 1/2/3/5 OS=Homo sapiens GN=MACF1 PE=1 SV=4	MACF1_HUMAN	MACF1	838 kDa	0.51	0.4	[]	12	0	0	12	281	45	27	353	29.4167	143	0	6	149	12.4167
880	DNA replication licensing factor MCM3 OS=Homo sapiens GN=MCM3 PE=1 SV=3	MCM3_HUMAN	MCM3	91 kDa	0.58	1.9	[]	1	0		1	8	17	5	30	30	48		9	57	57
1070	Aconitate hydratase, mitochondrial OS=Homo sapiens GN=ACO2 PE=1 SV=2	ACON_HUMAN	ACON	85 kDa	0.67	1.5	[]	1	0	1	2	20	23	17	60	30	73	1	16	90	45
1392	T-complex protein 1 subunit epsilon OS=Homo sapiens GN=CCT5 PE=1 SV=1	TCPE_HUMAN	TCPE	60 kDa	0.84	1.1	[]	0	7	2	9	50	84	141	275	30.5556	197	8	110	315	35
516	Nuclear mitotic apparatus protein 1 OS=Homo sapiens GN=NUMA1 PE=1 SV=2	NUMA1_HUMAN	NUMA1	238 kDa	0.42	0.6	[]	3	11	17	31	207	448	307	962	31.0323	438	0	130	568	18.3226
1505	60S ribosomal protein L28 OS=Homo sapiens GN=RPL28 PE=1 SV=3	RL28_HUMAN	RL28	16 kDa	0.91	1.2	[]	5	0	0	5	135	0	21	156	31.2	170		12	182	36.4
57	Spectrin beta chain, non-erythrocytic 2 OS=Homo sapiens GN=SPTBN2 PE=1 SV=3	SPTN2_HUMAN	SPTN2	271 kDa	0.16	0.2	[]	4	4	1	9	155	104	24	283	31.4444	57	5	6	68	7.55556
172	Phosphatidylinositol 4-kinase type 2-alpha OS=Homo sapiens GN=PI4K2A PE=1 SV=1	P4K2A_HUMAN	P4K2A	54 kDa	0.31	0	[]	1			1	29	3	0	32	32	0	0	0	0	0
766	Ataxin-2-like protein OS=Homo sapiens GN=ATXN2L PE=1 SV=2	ATX2L_HUMAN	ATX2L	113 kDa	0.53	1.9	[]	0	1	0	1	8	24	0	32	32	45	3	14	62	62
915	NADPH:adrenodoxin oxidoreductase, mitochondrial OS=Homo sapiens GN=FDXR PE=1 SV=3	ADRO_HUMAN	ADRO	54 kDa	0.6	2.1	[]	0		1	1	10	10	14	34	34	70	0	3	73	73
1108	Ras-related protein Rab-10 OS=Homo sapiens GN=RAB10 PE=1 SV=1	RAB10_HUMAN	RAB10	23 kDa	0.69	1.3	[]	0	6		6	122	63	24	209	34.8333	154	75	34	263	43.8333
212	Spectrin alpha chain, non-erythrocytic 1 OS=Homo sapiens GN=SPTAN1 PE=1 SV=3	SPTN1_HUMAN	SPTN1	285 kDa	0.34	0.2	[]	1	0	0	1	29	7	0	36	36	5	2	0	7	7
843	Splicing factor 3B subunit 1 OS=Homo sapiens GN=SF3B1 PE=1 SV=3	SF3B1_HUMAN	SF3B1	146 kDa	0.56	2.2	[]	0	1	0	1	7	27	2	36	36	69	0	10	79	79
1336	Leucine--tRNA ligase, cytoplasmic OS=Homo sapiens GN=LARS PE=1 SV=2	SYLC_HUMAN	SYLC	134 kDa	0.8	1.3	[]		1	1	2	15	21	38	74	37	83	0	13	96	48
1646	60S ribosomal protein L3 OS=Homo sapiens GN=RPL3 PE=1 SV=2	RL3_HUMAN	RL3	46 kDa	0.99	1	[]	7	0	0	7	43	154	62	259	37	213	21	27	261	37.2857
808	Syntaxin-4 OS=Homo sapiens GN=STX4 PE=1 SV=2	STX4_HUMAN	STX4	34 kDa	0.55	0.5	[]	0	0	1	1	29	11	0	40	40	16	1	4	21	21
640	Exportin-2 OS=Homo sapiens GN=CSE1L PE=1 SV=3	XPO2_HUMAN	XPO2	110 kDa	0.47	2.4	[]	1	0	1	2	51	19	10	80	40	155	12	25	192	96
1262	Vacuolar protein sorting-associated protein 13C OS=Homo sapiens GN=VPS13C PE=1 SV=1	VP13C_HUMAN	VP13C	422 kDa	0.76	0.6	[]	4	1	0	5	200	0	1	201	40.2	122	4	0	126	25.2
1393	60S ribosomal protein L6 OS=Homo sapiens GN=RPL6 PE=1 SV=3	RL6_HUMAN	RL6	33 kDa	0.84	0.9	[]	5	0	0	5	31	87	84	202	40.4	137	7	29	173	34.6
1435	Delta-1-pyrroline-5-carboxylate synthase OS=Homo sapiens GN=ALDH18A1 PE=1 SV=2	P5CS_HUMAN	P5CS	87 kDa	0.87	1.1	[]	3	0	1	4	29	66	71	166	41.5	129	13	44	186	46.5
81	Biliverdin reductase A OS=Homo sapiens GN=BLVRA PE=1 SV=2	BIEA_HUMAN	BIEA	33 kDa	0.2	0.4	[]	0	0	1	1	12	23	7	42	42	11		5	16	16
605	Ubiquitin-40S ribosomal protein S27a OS=Homo sapiens GN=RPS27A PE=1 SV=2	RS27A_HUMAN	RS27A	18 kDa	0.45	1.2	[]	52	27	24	103	1777	1227	1389	4393	42.6505	2382	1877	1127	5386	52.2913
144	Serine/threonine-protein kinase MRCK alpha OS=Homo sapiens GN=CDC42BPA PE=1 SV=1	MRCKA_HUMAN	MRCKA	197 kDa	0.29	0.2	[]	3	0	0	3	96	23	9	128	42.6667	24	2	0	26	8.66667
270	Protein sprouty homolog 1 OS=Homo sapiens GN=SPRY1 PE=1 SV=2	SPY1_HUMAN	SPY1	35 kDa	0.37	0.3	[]	1	0	0	1	33	10	0	43	43	2	10	0	12	12
512	Isoleucine--tRNA ligase, cytoplasmic OS=Homo sapiens GN=IARS PE=1 SV=2	SYIC_HUMAN	SYIC	145 kDa	0.42	0.5	[]	0	4	3	7	33	170	98	301	43	118	5	39	162	23.1429
863	60S ribosomal protein L7 OS=Homo sapiens GN=RPL7 PE=1 SV=1	RL7_HUMAN	RL7	29 kDa	0.58	2.3	[]	1	0	0	1	35	5	4	44	44	96		7	103	103
655	Girdin OS=Homo sapiens GN=CCDC88A PE=1 SV=2	GRDN_HUMAN	GRDN	216 kDa	0.48	0.4	[]	6	0	5	11	395	78	16	489	44.4545	169	17	3	189	17.1818
1306	Reticulon-4 OS=Homo sapiens GN=RTN4 PE=1 SV=2	RTN4_HUMAN	RTN4	130 kDa	0.79	1.2	[]	1		1	2	42	33	14	89	44.5	36	60	8	104	52
1483	Solute carrier family 12 member 7 OS=Homo sapiens GN=SLC12A7 PE=1 SV=3	S12A7_HUMAN	S12A7	119 kDa	0.89	1.1	[]	2	0	0	2	48	24	18	90	45	46	46	5	97	48.5
1466	Nucleophosmin OS=Homo sapiens GN=NPM1 PE=1 SV=2	NPM_HUMAN	NPM	33 kDa	0.89	1.1	[]	0	0	3	3	86	37	14	137	45.6667	128	14	15	157	52.3333
1481	E3 ubiquitin-protein ligase NEDD4-like OS=Homo sapiens GN=NEDD4L PE=1 SV=2	NED4L_HUMAN	NED4L	112 kDa	0.89	1.2	[]	1	0	0	1	41	4	2	47	47	52	3	1	56	56
1382	ATP synthase subunit O, mitochondrial OS=Homo sapiens GN=ATP5O PE=1 SV=1	ATPO_HUMAN	ATPO	23 kDa	0.83	0.8	[]	0	1	0	1	23	18	6	47	47	34		5	39	39
826	ATP synthase subunit gamma, mitochondrial OS=Homo sapiens GN=ATP5C1 PE=1 SV=1	ATPG_HUMAN	ATPG	33 kDa	0.56	0.6	[]	0		1	1	30	13	4	47	47	23		4	27	27
1215	Sodium/potassium-transporting ATPase subunit alpha-1 OS=Homo sapiens GN=ATP1A1 PE=1 SV=1	AT1A1_HUMAN	AT1A1	113 kDa	0.74	0.9	[]	25	17	8	50	962	1003	459	2424	48.48	832	967	357	2156	43.12
1557	Extended synaptotagmin-2 OS=Homo sapiens GN=ESYT2 PE=1 SV=1	ESYT2_HUMAN	ESYT2	102 kDa	0.94	1.1	[]	1	0		1	40	7	2	49	49	38	13	2	53	53
1363	Peptidyl-prolyl cis-trans isomerase A OS=Homo sapiens GN=PPIA PE=1 SV=2	PPIA_HUMAN	PPIA	18 kDa	0.82	1.4	[]	4			4	196			196	49	280	0		280	70
884	Transcription intermediary factor 1-beta OS=Homo sapiens GN=TRIM28 PE=1 SV=5	TIF1B_HUMAN	TIF1B	89 kDa	0.59	2	[]	1	0	0	1	7	32	11	50	50	84	1	13	98	98
1635	Glutaredoxin-3 OS=Homo sapiens GN=GLRX3 PE=1 SV=2	GLRX3_HUMAN	GLRX3	37 kDa	0.99	1	[]	0	1	0	1	28	18	4	50	50	50	1	0	51	51
1241	Methylthioribose-1-phosphate isomerase OS=Homo sapiens GN=MRI1 PE=1 SV=1	MTNA_HUMAN	MTNA	39 kDa	0.76	0.7	[]		1	0	1	10	31	9	50	50	34		3	37	37
514	Small ubiquitin-related modifier 2 OS=Homo sapiens GN=SUMO2 PE=1 SV=3	SUMO2_HUMAN	SUMO2	11 kDa	0.42	1.7	[]		1	0	1	0	36	14	50	50	40	25	18	83	83
1063	Plectin OS=Homo sapiens GN=PLEC PE=1 SV=3	PLEC_HUMAN	PLEC	532 kDa	0.67	1.6	[]	0	4	2	6	158	57	89	304	50.6667	411	6	66	483	80.5
116	Cyclin-dependent kinase 2 OS=Homo sapiens GN=CDK2 PE=1 SV=2	CDK2_HUMAN	CDK2	34 kDa	0.26	3.7	[]	0	1	0	1	27	15	10	52	52	43	25	19	87	87
1385	Fascin OS=Homo sapiens GN=FSCN1 PE=1 SV=3	FSCN1_HUMAN	FSCN1	55 kDa	0.84	0.8	[]	1	1	0	2	60	32	14	106	53	76	0	12	88	44
1352	Neutral alpha-glucosidase AB OS=Homo sapiens GN=GANAB PE=1 SV=3	GANAB_HUMAN	GANAB	107 kDa	0.81	1.2	[]	0	2	3	5	104	63	110	277	55.4	282	9	52	343	68.6
914	Cyclin-dependent kinase 14 OS=Homo sapiens GN=CDK14 PE=1 SV=3	CDK14_HUMAN	CDK14	53 kDa	0.6	0.5	[]	0	1		1	34	12	10	56	56	18	28		46	46
955	E3 ubiquitin-protein ligase HUWE1 OS=Homo sapiens GN=HUWE1 PE=1 SV=3	HUWE1_HUMAN	HUWE1	482 kDa	0.62	1.9	[]	2	0	0	2	38	27	47	112	56	203	0	15	218	109
107	Receptor-type tyrosine-protein phosphatase F OS=Homo sapiens GN=PTPRF PE=1 SV=2	PTPRF_HUMAN	PTPRF	213 kDa	0.25	0.3	[]	0	1	0	1	38	10	9	57	57	1	13	1	15	15
1190	Ras-related protein Rab-1A OS=Homo sapiens GN=RAB1A PE=1 SV=3	RAB1A_HUMAN	RAB1A	23 kDa	0.73	1.2	[]		6	1	7	234	139	35	408	58.2857	266	160	72	498	71.1429
829	5'-3' exoribonuclease 1 OS=Homo sapiens GN=XRN1 PE=1 SV=1	XRN1_HUMAN	XRN1	194 kDa	0.56	1.6	[]	1		0	1	44	9	6	59	59	49	47	1	97	97
518	Voltage-dependent anion-selective channel protein 3 OS=Homo sapiens GN=VDAC3 PE=1 SV=1	VDAC3_HUMAN	VDAC3	31 kDa	0.42	0.6	[]		1	0	1	26	26	7	59	59	22		13	35	35
1179	Cyclin-dependent kinase 4 OS=Homo sapiens GN=CDK4 PE=1 SV=2	CDK4_HUMAN	CDK4	34 kDa	0.72	1.5	[]	1	1	0	2	69	37	14	120	60	104		28	132	66
946	Nuclear pore complex protein Nup153 OS=Homo sapiens GN=NUP153 PE=1 SV=2	NU153_HUMAN	NU153	154 kDa	0.61	0.8	[]	0	1	2	3	26	94	69	189	63	78	39	32	149	49.6667
988	Clathrin heavy chain 1 OS=Homo sapiens GN=CLTC PE=1 SV=5	CLH1_HUMAN	CLH1	192 kDa	0.64	0.7	[]	0	3	7	10	232	300	144	676	67.6	398	0	80	478	47.8
1618	Paladin OS=Homo sapiens GN=PALD1 PE=1 SV=3	PALD_HUMAN	PALD	97 kDa	0.97	1	[]	1	0	0	1	68	1	1	70	70	19	48	0	67	67
1411	40S ribosomal protein S17 OS=Homo sapiens GN=RPS17 PE=1 SV=2	RS17_HUMAN	RS17	16 kDa	0.85	1.3	[]		1	0	1	67		3	70	70	93		0	93	93
1321	Moesin OS=Homo sapiens GN=MSN PE=1 SV=3	MOES_HUMAN	MOES	68 kDa	0.79	1.2	[]	1	0	0	1	47	17	8	72	72	29	59	6	94	94
1075	D-3-phosphoglycerate dehydrogenase OS=Homo sapiens GN=PHGDH PE=1 SV=4	SERA_HUMAN	SERA	57 kDa	0.68	1.7	[]	0	0	1	1	34	13	25	72	72	108	0	11	119	119
1292	Heterogeneous nuclear ribonucleoprotein M OS=Homo sapiens GN=HNRNPM PE=1 SV=3	HNRPM_HUMAN	HNRPM	78 kDa	0.78	1.4	[]	5	1	0	6	250	125	82	457	76.1667	554	0	67	621	103.5
1555	Bifunctional glutamate/proline--tRNA ligase OS=Homo sapiens GN=EPRS PE=1 SV=5	SYEP_HUMAN	SYEP	171 kDa	0.94	0.9	[]	0	3	0	3	35	152	43	230	76.6667	189	1	22	212	70.6667
1520	Pinin OS=Homo sapiens GN=PNN PE=1 SV=4	PININ_HUMAN	PININ	82 kDa	0.91	0.9	[]	2	0	0	2	145	13	1	159	79.5	106	32	2	140	70
1629	Protein LYRIC OS=Homo sapiens GN=MTDH PE=1 SV=2	LYRIC_HUMAN	LYRIC	64 kDa	0.98	1	[]	1		0	1	43	34	6	83	83	27	42	13	82	82
1314	Nuclear autoantigenic sperm protein OS=Homo sapiens GN=NASP PE=1 SV=2	NASP_HUMAN	NASP	85 kDa	0.79	0.8	[]	1		0	1	26	58	0	84	84	39	18	11	68	68
519	Nesprin-2 OS=Homo sapiens GN=SYNE2 PE=1 SV=3	SYNE2_HUMAN	SYNE2	796 kDa	0.42	0.2	[]	1	0	0	1	82	2	2	86	86	13	0	1	14	14
173	Unconventional myosin-Va OS=Homo sapiens GN=MYO5A PE=1 SV=2	MYO5A_HUMAN	MYO5A	215 kDa	0.31	0.3	[]	0	0	1	1	61	24	2	87	87	22	0	0	22	22
1357	Protein scribble homolog OS=Homo sapiens GN=SCRIB PE=1 SV=4	SCRIB_HUMAN	SCRIB	175 kDa	0.81	0.8	[]	0	2	0	2	105	53	17	175	87.5	129	2	7	138	69
1643	Talin-1 OS=Homo sapiens GN=TLN1 PE=1 SV=3	TLN1_HUMAN	TLN1	270 kDa	0.99	1	[]	0	1	0	1	52	33	3	88	88	87	0	2	89	89
413	Cyclin-dependent kinase 16 OS=Homo sapiens GN=CDK16 PE=1 SV=1	CDK16_HUMAN	CDK16	56 kDa	0.39	0.6	[]	0	1		1	43	32	13	88	88	25	32	13	70	70
158	T-complex protein 1 subunit theta OS=Homo sapiens GN=CCT8 PE=1 SV=4	TCPQ_HUMAN	TCPQ	60 kDa	0.3	1.3	[]	0	7	0	7	194	302	120	616	88	261	289	257	807	115.286
1078	Poly [ADP-ribose] polymerase 1 OS=Homo sapiens GN=PARP1 PE=1 SV=4	PARP1_HUMAN	PARP1	113 kDa	0.68	1.4	[]	0	0	1	1	4	49	40	93	93	79	9	38	126	126
612	Protein disulfide-isomerase A3 OS=Homo sapiens GN=PDIA3 PE=1 SV=4	PDIA3_HUMAN	PDIA3	57 kDa	0.46	0.8	[]	0	2		2	73	72	42	187	93.5	73	45	28	146	73
485	Triple functional domain protein OS=Homo sapiens GN=TRIO PE=1 SV=2	TRIO_HUMAN	TRIO	347 kDa	0.42	0.2	[]	1	0	0	1	87	6	2	95	95	18	0	0	18	18
1407	Methionine--tRNA ligase, cytoplasmic OS=Homo sapiens GN=MARS PE=1 SV=2	SYMC_HUMAN	SYMC	101 kDa	0.85	1.2	[]	1	0	0	1	39	35	30	104	104	101	0	22	123	123
1317	Heme oxygenase 2 OS=Homo sapiens GN=HMOX2 PE=1 SV=2	HMOX2_HUMAN	HMOX2	36 kDa	0.79	1.2	[]	0	2	1	3	204	110	20	334	111.333	150	202	42	394	131.333
1105	E3 SUMO-protein ligase RanBP2 OS=Homo sapiens GN=RANBP2 PE=1 SV=2	RBP2_HUMAN	RBP2	358 kDa	0.69	1.6	[]	2	1	1	4	277	106	68	451	112.75	651	11	69	731	182.75
1344	60S ribosomal protein L10 OS=Homo sapiens GN=RPL10 PE=1 SV=4	RL10_HUMAN	RL10	25 kDa	0.8	0.8	[]	0	2	4	6	543	93	59	695	115.833	469	7	49	525	87.5
1197	60S ribosomal protein L15 OS=Homo sapiens GN=RPL15 PE=1 SV=2	RL15_HUMAN	RL15	24 kDa	0.73	1.4	[]	1	0	1	2	127	73	32	232	116	279	17	34	330	165
235	Cyclin-dependent kinase 1 OS=Homo sapiens GN=CDK1 PE=1 SV=3	CDK1_HUMAN	CDK1	34 kDa	0.35	2.4	[]	0	1		1	62	42	16	120	120	141	33	55	229	229
1282	ADP-ribosylation factor 5 OS=Homo sapiens GN=ARF5 PE=1 SV=2	ARF5_HUMAN	ARF5	21 kDa	0.77	1.6	[]	1	0	0	1	124		5	129	129	195	3	1	199	199
1255	DNA replication licensing factor MCM6 OS=Homo sapiens GN=MCM6 PE=1 SV=1	MCM6_HUMAN	MCM6	93 kDa	0.76	0.8	[]	0	0	1	1	11	60	80	151	151	94	0	23	117	117
1622	60S ribosomal protein L7a OS=Homo sapiens GN=RPL7A PE=1 SV=2	RL7A_HUMAN	RL7A	30 kDa	0.98	1	[]		0	1	1	58	70	24	152	152	108	7	34	149	149
10	Polypyrimidine tract-binding protein 1 OS=Homo sapiens GN=PTBP1 PE=1 SV=1	PTBP1_HUMAN	PTBP1	57 kDa	0.078	0.3	[]	1	0		1	47	75	33	155	155	31		16	47	47
437	Filamin-C OS=Homo sapiens GN=FLNC PE=1 SV=3	FLNC_HUMAN	FLNC	291 kDa	0.4	2.2	[]	0	0	2	2	114	177	47	338	169	472	117	96	685	342.5
1112	Plastin-3 OS=Homo sapiens GN=PLS3 PE=1 SV=4	PLST_HUMAN	PLST	71 kDa	0.69	0.7	[]	0	1		1	90	67	18	175	175	106	5	14	125	125
142	Rho GTPase-activating protein 21 OS=Homo sapiens GN=ARHGAP21 PE=1 SV=1	RHG21_HUMAN	RHG21	217 kDa	0.29	0.4	[]	1	1	0	2	236	92	33	361	180.5	67	60	2	129	64.5
1025	Antigen KI-67 OS=Homo sapiens GN=MKI67 PE=1 SV=2	KI67_HUMAN	KI67	359 kDa	0.65	0.7	[]	0	0	1	1	55	143	33	231	231	129	1	26	156	156
892	Dolichyl-diphosphooligosaccharide--protein glycosyltransferase subunit 1 OS=Homo sapiens GN=RPN1 PE=1 SV=1	RPN1_HUMAN	RPN1	69 kDa	0.59	0.6	[]	1			1	164	57	40	261	261	132	24	9	165	165
65	Protein NDRG1 OS=Homo sapiens GN=NDRG1 PE=1 SV=1	NDRG1_HUMAN	NDRG1	43 kDa	0.18	0.6	[]		0	3	3	390	337	234	961	320.333	235	282	100	617	205.667
1259	Nucleoprotein TPR OS=Homo sapiens GN=TPR PE=1 SV=3	TPR_HUMAN	TPR	267 kDa	0.76	1.6	[]	1	0	0	1	317	1	4	322	322	518	0	0	518	518
1120	Tyrosine-protein kinase Lyn OS=Homo sapiens GN=LYN PE=1 SV=3	LYN_HUMAN	LYN	59 kDa	0.69	0.8	[]	0	1	0	1	160	103	60	323	323	113	127	30	270	270
1499	Ras-related protein Rab-7a OS=Homo sapiens GN=RAB7A PE=1 SV=1	RAB7A_HUMAN	RAB7A	23 kDa	0.9	0.9	[]		2		2	359	255	97	711	355.5	331	236	105	672	336
1599	Cytoplasmic dynein 1 heavy chain 1 OS=Homo sapiens GN=DYNC1H1 PE=1 SV=5	DYHC1_HUMAN	DYHC1	532 kDa	0.96	1	[]	2	0	1	3	625	248	367	1240	413.333	1086	0	99	1185	395
1600	Synaptobrevin homolog YKT6 OS=Homo sapiens GN=YKT6 PE=1 SV=1	YKT6_HUMAN	YKT6	22 kDa	0.96	1	[]		2		2	457	329	118	904	452	384	368	133	885	442.5
812	DNA-dependent protein kinase catalytic subunit OS=Homo sapiens GN=PRKDC PE=1 SV=3	PRKDC_HUMAN	PRKDC	469 kDa	0.55	0.6	[]	1	1	1	3	622	403	339	1364	454.667	753	1	121	875	291.667
42	Rho-associated protein kinase 1 OS=Homo sapiens GN=ROCK1 PE=1 SV=1	ROCK1_HUMAN	ROCK1	158 kDa	0.14	0.3	[]	1	0	0	1	176	235	59	470	470	113	1	10	124	124
698	Zinc finger CCCH-type antiviral protein 1 OS=Homo sapiens GN=ZC3HAV1 PE=1 SV=3	ZCCHV_HUMAN	ZCCHV	101 kDa	0.5	0.8	[]	0		2	2	464	315	195	974	487	293	338	109	740	370
122	Golgin subfamily B member 1 OS=Homo sapiens GN=GOLGB1 PE=1 SV=2	GOGB1_HUMAN	GOGB1	376 kDa	0.27	0.3	[]	3	0	0	3	996	307	171	1474	491.333	333	72	21	426	142
889	Band 4.1-like protein 2 OS=Homo sapiens GN=EPB41L2 PE=1 SV=1	E41L2_HUMAN	E41L2	113 kDa	0.59	0.8	[]	0	2	8	10	1753	2593	858	5204	520.4	1330	2057	700	4087	408.7
1040	Solute carrier family 12 member 2 OS=Homo sapiens GN=SLC12A2 PE=1 SV=1	S12A2_HUMAN	S12A2	131 kDa	0.66	0.8	[]	0		2	2	396	503	220	1119	559.5	310	500	109	919	459.5
1650	Lamina-associated polypeptide 2, isoforms beta/gamma OS=Homo sapiens GN=TMPO PE=1 SV=2	LAP2B_HUMAN	LAP2B	51 kDa	1	1	[]	0	5		5	1551	1390	1098	4039	807.8	1206	2011	820	4037	807.4
68	Protein AHNAK2 OS=Homo sapiens GN=AHNAK2 PE=1 SV=2	AHNK2_HUMAN	AHNK2	617 kDa	0.18	0.4	[]	1	0	0	1	574	620	87	1281	1281	171	91	176	438	438
78	Neuroblast differentiation-associated protein AHNAK OS=Homo sapiens GN=AHNAK PE=1 SV=2	AHNK_HUMAN	AHNK	629 kDa	0.2	0.7	[]	8	3	27	38	22748	22299	13470	58517	1539.92	16358	15384	9357	41099	1081.55
1154	Filamin-A OS=Homo sapiens GN=FLNA PE=1 SV=4	FLNA_HUMAN	FLNA	281 kDa	0.71	1.1	[]	2	0	3	5	2928	3614	1413	7955	1591	4333	2922	1854	9109	1821.8
285	Very long-chain specific acyl-CoA dehydrogenase, mitochondrial OS=Homo sapiens GN=ACADVL PE=1 SV=1	ACADV_HUMAN	ACADV	70 kDa	0.37	INF	[]	0	0	0	0	0		0	0	#DIV/0!	9		0	9	#DIV/0!
253	Activating signal cointegrator 1 complex subunit 3 OS=Homo sapiens GN=ASCC3 PE=1 SV=3	ASCC3_HUMAN	ASCC3	251 kDa	0.36	INF	[]	0	0	0	0	0	0	0	0	#DIV/0!	47	0	1	48	#DIV/0!
326	Cytoskeleton-associated protein 2 OS=Homo sapiens GN=CKAP2 PE=1 SV=1	CKAP2_HUMAN	CKAP2	77 kDa	0.37	INF	[]	0	0	0	0	0	0	0	0	#DIV/0!	5	0	0	5	#DIV/0!
329	HEAT repeat-containing protein 1 OS=Homo sapiens GN=HEATR1 PE=1 SV=3	HEAT1_HUMAN	HEAT1	242 kDa	0.37	INF	[]	0	0	0	0	0	0	0	0	#DIV/0!	10		0	10	#DIV/0!
318	Hypoxia up-regulated protein 1 OS=Homo sapiens GN=HYOU1 PE=1 SV=1	HYOU1_HUMAN	HYOU1	111 kDa	0.37	INF	[]	0	0	0	0	0	0	0	0	#DIV/0!	12	0	0	12	#DIV/0!
320	Galectin-3-binding protein OS=Homo sapiens GN=LGALS3BP PE=1 SV=1	LG3BP_HUMAN	LG3BP	65 kDa	0.37	INF	[]	0	0	0	0	0	0	0	0	#DIV/0!	0	59	0	59	#DIV/0!
328	MICOS complex subunit MIC60 OS=Homo sapiens GN=IMMT PE=1 SV=1	MIC60_HUMAN	MIC60	84 kDa	0.37	INF	[]	0	0	0	0	0	0	0	0	#DIV/0!	24	0	0	24	#DIV/0!
289	Phosphatidylinositol 4-phosphate 3-kinase C2 domain-containing subunit alpha OS=Homo sapiens GN=PIK3C2A PE=1 SV=2	P3C2A_HUMAN	P3C2A	191 kDa	0.37	INF	[]	0	0	0	0	0		0	0	#DIV/0!	13		0	13	#DIV/0!
335	Neuropathy target esterase OS=Homo sapiens GN=PNPLA6 PE=1 SV=2	PLPL6_HUMAN	PLPL6	150 kDa	0.37	INF	[]	0	0	0	0	0	0	0	0	#DIV/0!	14	0	0	14	#DIV/0!
321	Proteasome subunit alpha type-2 OS=Homo sapiens GN=PSMA2 PE=1 SV=2	PSA2_HUMAN	PSA2	26 kDa	0.37	INF	[]	0	0	0	0		0		0	#DIV/0!	27	0	0	27	#DIV/0!
319	DNA-directed RNA polymerase II subunit RPB1 OS=Homo sapiens GN=POLR2A PE=1 SV=2	RPB1_HUMAN	RPB1	217 kDa	0.37	INF	[]	0	0	0	0	0		0	0	#DIV/0!	12	0	0	12	#DIV/0!
317	Helicase SKI2W OS=Homo sapiens GN=SKIV2L PE=1 SV=3	SKIV2_HUMAN	SKIV2	138 kDa	0.37	INF	[]	0	0	0	0	0	0		0	#DIV/0!	23	0	0	23	#DIV/0!
183	Serine--tRNA ligase, cytoplasmic OS=Homo sapiens GN=SARS PE=1 SV=3	SYSC_HUMAN	SYSC	59 kDa	0.32	INF	[]	0	0	0	0	0	0	0	0	#DIV/0!	22	0	2	24	#DIV/0!
80	Telomere length regulation protein TEL2 homolog OS=Homo sapiens GN=TELO2 PE=1 SV=2	TELO2_HUMAN	TELO2	92 kDa	0.2	INF	[]	0	0	0	0	0	0	0	0	#DIV/0!	32	0	11	43	#DIV/0!
217	Transketolase OS=Homo sapiens GN=TKT PE=1 SV=3	TKT_HUMAN	TKT	68 kDa	0.34	INF	[]	0	0	0	0	0	0	0	0	#DIV/0!	17		1	18	#DIV/0!
279	Transportin-3 OS=Homo sapiens GN=TNPO3 PE=1 SV=3	TNPO3_HUMAN	TNPO3	104 kDa	0.37	INF	[]	0	0	0	0	0		0	0	#DIV/0!	11	0	0	11	#DIV/0!
247	Ubiquitin carboxyl-terminal hydrolase 5 OS=Homo sapiens GN=USP5 PE=1 SV=2	UBP5_HUMAN	UBP5	96 kDa	0.36	INF	[]	0	0	0	0	0	0	0	0	#DIV/0!	42	1	0	43	#DIV/0!
189	Zinc finger protein 598 OS=Homo sapiens GN=ZNF598 PE=1 SV=1	ZN598_HUMAN	ZN598	99 kDa	0.32	INF	[]	0	0	0	0	0		0	0	#DIV/0!	12		1	13	#DIV/0!
296	Cytosol aminopeptidase OS=Homo sapiens GN=LAP3 PE=1 SV=3	AMPL_HUMAN	AMPL	56 kDa	0.37	INF	[]	0	0		0	0			0	#DIV/0!	13			13	#DIV/0!
352	Ribosome biogenesis protein BOP1 OS=Homo sapiens GN=BOP1 PE=1 SV=2	BOP1_HUMAN	BOP1	84 kDa	0.37	INF	[]	0	0		0	0	0		0	#DIV/0!	12	0		12	#DIV/0!
334	Condensin complex subunit 1 OS=Homo sapiens GN=NCAPD2 PE=1 SV=3	CND1_HUMAN	CND1	157 kDa	0.37	INF	[]	0	0		0	0		0	0	#DIV/0!	92	0	0	92	#DIV/0!
295	DNA damage-binding protein 1 OS=Homo sapiens GN=DDB1 PE=1 SV=1	DDB1_HUMAN	DDB1	127 kDa	0.37	INF	[]	0	0		0	0		0	0	#DIV/0!	32			32	#DIV/0!
351	Gamma-tubulin complex component 2 OS=Homo sapiens GN=TUBGCP2 PE=1 SV=2	GCP2_HUMAN	GCP2	103 kDa	0.37	INF	[]	0	0		0	0	0	0	0	#DIV/0!	6			6	#DIV/0!
277	G-protein-signaling modulator 1 OS=Homo sapiens GN=GPSM1 PE=1 SV=2	GPSM1_HUMAN	GPSM1	75 kDa	0.37	INF	[]	0	0		0	0	0	0	0	#DIV/0!	9	0	0	9	#DIV/0!
345	Protein HGH1 homolog OS=Homo sapiens GN=HGH1 PE=1 SV=1	HGH1_HUMAN	HGH1	42 kDa	0.37	INF	[]	0	0		0	0	0		0	#DIV/0!	12			12	#DIV/0!
291	Integrin-linked kinase-associated serine/threonine phosphatase 2C OS=Homo sapiens GN=ILKAP PE=1 SV=1	ILKAP_HUMAN	ILKAP	43 kDa	0.37	INF	[]	0	0		0			0	0	#DIV/0!	17		0	17	#DIV/0!
283	Importin-8 OS=Homo sapiens GN=IPO8 PE=1 SV=2	IPO8_HUMAN	IPO8	120 kDa	0.37	INF	[]	0	0		0	0	0	0	0	#DIV/0!	13	0	0	13	#DIV/0!
100	26S proteasome non-ATPase regulatory subunit 3 OS=Homo sapiens GN=PSMD3 PE=1 SV=2	PSMD3_HUMAN	PSMD3	61 kDa	0.24	INF	[]	0	0		0	0			0	#DIV/0!	8	0	2	10	#DIV/0!
160	Ran-specific GTPase-activating protein OS=Homo sapiens GN=RANBP1 PE=1 SV=1	RANG_HUMAN	RANG	23 kDa	0.3	INF	[]	0	0		0	0	0	0	0	#DIV/0!	17	0	2	19	#DIV/0!
280	Protein argonaute-2 OS=Homo sapiens GN=AGO2 PE=1 SV=3	AGO2_HUMAN	AGO2	97 kDa	0.37	INF	[]	0		0	0	0			0	#DIV/0!	8		0	8	#DIV/0!
294	Dual specificity protein phosphatase 1 OS=Homo sapiens GN=DUSP1 PE=1 SV=3	DUS1_HUMAN	DUS1	39 kDa	0.37	INF	[]	0		0	0	0		0	0	#DIV/0!	65			65	#DIV/0!
297	Eukaryotic translation initiation factor 3 subunit M OS=Homo sapiens GN=EIF3M PE=1 SV=1	EIF3M_HUMAN	EIF3M	43 kDa	0.37	INF	[]	0		0	0	0	0		0	#DIV/0!	16			16	#DIV/0!
323	KIF1-binding protein OS=Homo sapiens GN=KIF1BP PE=1 SV=1	KBP_HUMAN	KBP	72 kDa	0.37	INF	[]	0		0	0			0	0	#DIV/0!	27		0	27	#DIV/0!
338	Methionine aminopeptidase 1 OS=Homo sapiens GN=METAP1 PE=1 SV=2	MAP11_HUMAN	MAP11	43 kDa	0.37	INF	[]	0		0	0	0		0	0	#DIV/0!	12	0		12	#DIV/0!
330	NAD kinase 2, mitochondrial OS=Homo sapiens GN=NADK2 PE=1 SV=2	NAKD2_HUMAN	NAKD2	49 kDa	0.37	INF	[]	0		0	0	0	0	0	0	#DIV/0!	10	0	0	10	#DIV/0!
162	Protein pelota homolog OS=Homo sapiens GN=PELO PE=1 SV=2	PELO_HUMAN	PELO	43 kDa	0.31	INF	[]	0		0	0	0	0	0	0	#DIV/0!	9	0	1	10	#DIV/0!
299	RNA-binding protein Raly OS=Homo sapiens GN=RALY PE=1 SV=1	RALY_HUMAN	RALY	32 kDa	0.37	INF	[]	0		0	0	0	0		0	#DIV/0!	16	0		16	#DIV/0!
32	Alpha-2-macroglobulin OS=Homo sapiens GN=A2M PE=1 SV=3	A2MG_HUMAN	A2MG	163 kDa	0.12	INF	[]	0			0	0	0		0	#DIV/0!	0	12	9	21	#DIV/0!
313	Alanyl-tRNA editing protein Aarsd1 OS=Homo sapiens GN=AARSD1 PE=1 SV=2	AASD1_HUMAN	AASD1	45 kDa	0.37	INF	[]	0			0				0	#DIV/0!	4	0		4	#DIV/0!
356	Alcohol dehydrogenase class-3 OS=Homo sapiens GN=ADH5 PE=1 SV=4	ADHX_HUMAN	ADHX	40 kDa	0.37	INF	[]	0			0	0			0	#DIV/0!	10	0		10	#DIV/0!
342	Clusterin OS=Homo sapiens GN=CLU PE=1 SV=1	CLUS_HUMAN	CLUS	52 kDa	0.37	INF	[]	0			0	0			0	#DIV/0!	12			12	#DIV/0!
331	Cleavage and polyadenylation specificity factor subunit 3 OS=Homo sapiens GN=CPSF3 PE=1 SV=1	CPSF3_HUMAN	CPSF3	77 kDa	0.37	INF	[]	0			0	0		0	0	#DIV/0!	23	0	0	23	#DIV/0!
312	DNA polymerase delta subunit 2 OS=Homo sapiens GN=POLD2 PE=1 SV=1	DPOD2_HUMAN	DPOD2	51 kDa	0.37	INF	[]	0			0	0			0	#DIV/0!	4			4	#DIV/0!
190	Translation initiation factor eIF-2B subunit gamma OS=Homo sapiens GN=EIF2B3 PE=1 SV=1	EI2BG_HUMAN	EI2BG	50 kDa	0.32	INF	[]	0			0			0	0	#DIV/0!	12		1	13	#DIV/0!
303	Echinoderm microtubule-associated protein-like 4 OS=Homo sapiens GN=EML4 PE=1 SV=3	EMAL4_HUMAN	EMAL4	109 kDa	0.37	INF	[]	0			0	0			0	#DIV/0!	13	0		13	#DIV/0!
353	Fatty acyl-CoA reductase 1 OS=Homo sapiens GN=FAR1 PE=1 SV=1	FACR1_HUMAN	FACR1	59 kDa	0.37	INF	[]	0			0	0			0	#DIV/0!	12	0		12	#DIV/0!
355	Fas apoptotic inhibitory molecule 1 OS=Homo sapiens GN=FAIM PE=1 SV=1	FAIM1_HUMAN	FAIM1	20 kDa	0.37	INF	[]	0			0	0	0		0	#DIV/0!	7			7	#DIV/0!
292	Farnesyl pyrophosphate synthase OS=Homo sapiens GN=FDPS PE=1 SV=4	FPPS_HUMAN	FPPS	48 kDa	0.37	INF	[]	0			0				0	#DIV/0!	19		0	19	#DIV/0!
288	Interleukin enhancer-binding factor 2 OS=Homo sapiens GN=ILF2 PE=1 SV=2	ILF2_HUMAN	ILF2	43 kDa	0.37	INF	[]	0			0	0			0	#DIV/0!	34		0	34	#DIV/0!
284	Importin-9 OS=Homo sapiens GN=IPO9 PE=1 SV=3	IPO9_HUMAN	IPO9	116 kDa	0.37	INF	[]	0			0	0			0	#DIV/0!	16	0	0	16	#DIV/0!
311	Transcription factor AP-1 OS=Homo sapiens GN=JUN PE=1 SV=2	JUN_HUMAN	JUN	36 kDa	0.37	INF	[]	0			0	0	0		0	#DIV/0!	8			8	#DIV/0!
358	Transcriptional regulator Kaiso OS=Homo sapiens GN=ZBTB33 PE=1 SV=2	KAISO_HUMAN	KAISO	74 kDa	0.37	INF	[]	0			0				0	#DIV/0!	0	6		6	#DIV/0!
357	Protein LTV1 homolog OS=Homo sapiens GN=LTV1 PE=1 SV=1	LTV1_HUMAN	LTV1	55 kDa	0.37	INF	[]	0			0	0	0		0	#DIV/0!	10			10	#DIV/0!
304	Protein mago nashi homolog OS=Homo sapiens GN=MAGOH PE=1 SV=1	MGN_HUMAN	MGN	17 kDa	0.37	INF	[]	0			0				0	#DIV/0!	17	0		17	#DIV/0!
349	Myosin regulatory light chain 12A OS=Homo sapiens GN=MYL12A PE=1 SV=2	ML12A_HUMAN (+1)	ML12A	20 kDa	0.37	INF	[]	0			0	0			0	#DIV/0!	28			28	#DIV/0!
346	Metastasis-associated protein MTA2 OS=Homo sapiens GN=MTA2 PE=1 SV=1	MTA2_HUMAN	MTA2	75 kDa	0.37	INF	[]	0			0	0		0	0	#DIV/0!	15	0		15	#DIV/0!
300	NADH dehydrogenase [ubiquinone] 1 beta subcomplex subunit 4 OS=Homo sapiens GN=NDUFB4 PE=1 SV=3	NDUB4_HUMAN	NDUB4	15 kDa	0.37	INF	[]	0			0	0			0	#DIV/0!	22			22	#DIV/0!
327	Polymerase delta-interacting protein 2 OS=Homo sapiens GN=POLDIP2 PE=1 SV=1	PDIP2_HUMAN	PDIP2	42 kDa	0.37	INF	[]	0			0	0		0	0	#DIV/0!	14		0	14	#DIV/0!
343	Core-binding factor subunit beta OS=Homo sapiens GN=CBFB PE=1 SV=2	PEBB_HUMAN	PEBB	22 kDa	0.37	INF	[]	0			0			0	0	#DIV/0!	28	0		28	#DIV/0!
339	Peptidyl-prolyl cis-trans isomerase F, mitochondrial OS=Homo sapiens GN=PPIF PE=1 SV=1	PPIF_HUMAN	PPIF	22 kDa	0.37	INF	[]	0			0	0		0	0	#DIV/0!	20			20	#DIV/0!
307	Profilin-2 OS=Homo sapiens GN=PFN2 PE=1 SV=3	PROF2_HUMAN	PROF2	15 kDa	0.37	INF	[]	0			0	0			0	#DIV/0!	17			17	#DIV/0!
287	Proteasome subunit beta type-3 OS=Homo sapiens GN=PSMB3 PE=1 SV=2	PSB3_HUMAN	PSB3	23 kDa	0.37	INF	[]	0			0	0		0	0	#DIV/0!	22	0	0	22	#DIV/0!
36	26S proteasome non-ATPase regulatory subunit 1 OS=Homo sapiens GN=PSMD1 PE=1 SV=2	PSMD1_HUMAN	PSMD1	106 kDa	0.13	INF	[]	0			0	0	0	0	0	#DIV/0!	15	11		26	#DIV/0!
359	39S ribosomal protein L22, mitochondrial OS=Homo sapiens GN=MRPL22 PE=1 SV=1	RM22_HUMAN	RM22	24 kDa	0.37	INF	[]	0			0	0			0	#DIV/0!	14			14	#DIV/0!
233	DNA-directed RNA polymerase II subunit RPB3 OS=Homo sapiens GN=POLR2C PE=1 SV=2	RPB3_HUMAN	RPB3	31 kDa	0.35	INF	[]	0			0	0			0	#DIV/0!	25		1	26	#DIV/0!
348	TraB domain-containing protein OS=Homo sapiens GN=TRABD PE=1 SV=1	TRABD_HUMAN	TRABD	42 kDa	0.37	INF	[]	0			0	0			0	#DIV/0!	20	0		20	#DIV/0!
325	E3 ubiquitin/ISG15 ligase TRIM25 OS=Homo sapiens GN=TRIM25 PE=1 SV=2	TRI25_HUMAN	TRI25	71 kDa	0.37	INF	[]	0			0	0		0	0	#DIV/0!	23		0	23	#DIV/0!
361	Arsenite methyltransferase OS=Homo sapiens GN=AS3MT PE=1 SV=3	AS3MT_HUMAN	AS3MT	42 kDa	0.37	INF	[]		0	0	0				0	#DIV/0!	7	0		7	#DIV/0!
301	39S ribosomal protein L19, mitochondrial OS=Homo sapiens GN=MRPL19 PE=1 SV=2	RM19_HUMAN	RM19	34 kDa	0.37	INF	[]		0	0	0	0		0	0	#DIV/0!	9	0		9	#DIV/0!
290	Protein arginine N-methyltransferase 1 OS=Homo sapiens GN=PRMT1 PE=1 SV=2	ANM1_HUMAN	ANM1	42 kDa	0.37	INF	[]		0		0	0			0	#DIV/0!	13	0	0	13	#DIV/0!
278	Mannose-1-phosphate guanyltransferase alpha OS=Homo sapiens GN=GMPPA PE=1 SV=1	GMPPA_HUMAN	GMPPA	46 kDa	0.37	INF	[]		0		0				0	#DIV/0!	29		0	29	#DIV/0!
309	Ribonuclease H2 subunit C OS=Homo sapiens GN=RNASEH2C PE=1 SV=1	RNH2C_HUMAN	RNH2C	18 kDa	0.37	INF	[]		0		0	0			0	#DIV/0!	11			11	#DIV/0!
227	Asparagine--tRNA ligase, cytoplasmic OS=Homo sapiens GN=NARS PE=1 SV=1	SYNC_HUMAN	SYNC	63 kDa	0.34	INF	[]		0		0				0	#DIV/0!	21		1	22	#DIV/0!
347	Tubulin-specific chaperone E OS=Homo sapiens GN=TBCE PE=1 SV=1	TBCE_HUMAN	TBCE	59 kDa	0.37	INF	[]			0	0	0			0	#DIV/0!	14			14	#DIV/0!
362	Complement component 1 Q subcomponent-binding protein, mitochondrial OS=Homo sapiens GN=C1QBP PE=1 SV=1	C1QBP_HUMAN	C1QBP	31 kDa	0.37	INF	[]				0	0			0	#DIV/0!	6			6	#DIV/0!
336	G2/mitotic-specific cyclin-B2 OS=Homo sapiens GN=CCNB2 PE=1 SV=1	CCNB2_HUMAN	CCNB2	45 kDa	0.37	INF	[]				0	0		0	0	#DIV/0!	0	10	0	10	#DIV/0!
152	CD83 antigen OS=Homo sapiens GN=CD83 PE=1 SV=1	CD83_HUMAN	CD83	23 kDa	0.3	INF	[]				0				0	#DIV/0!	8	1		9	#DIV/0!
9	Ras GTPase-activating protein-binding protein 1 OS=Homo sapiens GN=G3BP1 PE=1 SV=1	G3BP1_HUMAN	G3BP1	52 kDa	0.076	INF	[]				0			0	0	#DIV/0!	18	15	2	35	#DIV/0!
337	Growth arrest and DNA damage-inducible protein GADD45 beta OS=Homo sapiens GN=GADD45B PE=1 SV=1	GA45B_HUMAN	GA45B	18 kDa	0.37	INF	[]				0				0	#DIV/0!	80			80	#DIV/0!
156	Intercellular adhesion molecule 1 OS=Homo sapiens GN=ICAM1 PE=1 SV=2	ICAM1_HUMAN	ICAM1	58 kDa	0.3	INF	[]				0	0			0	#DIV/0!	3	25		28	#DIV/0!
177	Mitotic spindle assembly checkpoint protein MAD2A OS=Homo sapiens GN=MAD2L1 PE=1 SV=1	MD2L1_HUMAN	MD2L1	24 kDa	0.32	INF	[]				0	0	0		0	#DIV/0!	21		2	23	#DIV/0!
66	Malate dehydrogenase, mitochondrial OS=Homo sapiens GN=MDH2 PE=1 SV=3	MDHM_HUMAN	MDHM	36 kDa	0.18	INF	[]				0	0		0	0	#DIV/0!	10		4	14	#DIV/0!
350	Mitogen-activated protein kinase 3 OS=Homo sapiens GN=MAPK3 PE=1 SV=4	MK03_HUMAN	MK03	43 kDa	0.37	INF	[]				0	0			0	#DIV/0!	20			20	#DIV/0!
305	Phospholipase A-2-activating protein OS=Homo sapiens GN=PLAA PE=1 SV=2	PLAP_HUMAN	PLAP	87 kDa	0.37	INF	[]				0	0		0	0	#DIV/0!	8	0		8	#DIV/0!
340	Peptidyl-prolyl cis-trans isomerase D OS=Homo sapiens GN=PPID PE=1 SV=3	PPID_HUMAN	PPID	41 kDa	0.37	INF	[]				0	0	0	0	0	#DIV/0!	12	0		12	#DIV/0!
344	Protein phosphatase 1 regulatory subunit 15A OS=Homo sapiens GN=PPP1R15A PE=1 SV=1	PR15A_HUMAN	PR15A	73 kDa	0.37	INF	[]				0	0		0	0	#DIV/0!	27	0		27	#DIV/0!
354	60S ribosomal protein L30 OS=Homo sapiens GN=RPL30 PE=1 SV=2	RL30_HUMAN	RL30	13 kDa	0.37	INF	[]				0	0			0	#DIV/0!	23			23	#DIV/0!
310	39S ribosomal protein L48, mitochondrial OS=Homo sapiens GN=MRPL48 PE=1 SV=2	RM48_HUMAN	RM48	24 kDa	0.37	INF	[]				0				0	#DIV/0!	9			9	#DIV/0!
363	28S ribosomal protein S17, mitochondrial OS=Homo sapiens GN=MRPS17 PE=1 SV=1	RT17_HUMAN	RT17	15 kDa	0.37	INF	[]				0				0	#DIV/0!	5			5	#DIV/0!
360	28S ribosomal protein S23, mitochondrial OS=Homo sapiens GN=MRPS23 PE=1 SV=2	RT23_HUMAN	RT23	22 kDa	0.37	INF	[]				0	0	0	0	0	#DIV/0!	10			10	#DIV/0!
306	28S ribosomal protein S28, mitochondrial OS=Homo sapiens GN=MRPS28 PE=1 SV=1	RT28_HUMAN	RT28	21 kDa	0.37	INF	[]				0	0			0	#DIV/0!	16			16	#DIV/0!
298	Thiosulfate sulfurtransferase OS=Homo sapiens GN=TST PE=1 SV=4	THTR_HUMAN	THTR	33 kDa	0.37	INF	[]				0	0			0	#DIV/0!	21			21	#DIV/0!
308	Ubiquitin-conjugating enzyme E2 L3 OS=Homo sapiens GN=UBE2L3 PE=1 SV=1	UB2L3_HUMAN	UB2L3	18 kDa	0.37	INF	[]				0	0		0	0	#DIV/0!	17			17	#DIV/0!
324	SUMO-conjugating enzyme UBC9 OS=Homo sapiens GN=UBE2I PE=1 SV=1	UBC9_HUMAN	UBC9	18 kDa	0.37	INF	[]				0	0		0	0	#DIV/0!	15	0	0	15	#DIV/0!
151	WD repeat-containing protein 43 OS=Homo sapiens GN=WDR43 PE=1 SV=3	WDR43_HUMAN	WDR43	75 kDa	0.3	INF	[]				0	0	0	0	0	#DIV/0!	24	3	0	27	#DIV/0!
467	Centromere protein V OS=Homo sapiens GN=CENPV PE=1 SV=1	CENPV_HUMAN	CENPV	30 kDa	0.41	13	[]	0	0	0	0	1	0	0	1	#DIV/0!	13		0	13	#DIV/0!
244	Gem-associated protein 4 OS=Homo sapiens GN=GEMIN4 PE=1 SV=2	GEMI4_HUMAN	GEMI4	120 kDa	0.36	47	[]	0	0	0	0	1	0	0	1	#DIV/0!	45	0	2	47	#DIV/0!
449	Lysine-specific demethylase 2A OS=Homo sapiens GN=KDM2A PE=1 SV=3	KDM2A_HUMAN	KDM2A	133 kDa	0.4	16	[]	0	0	0	0	1	0	0	1	#DIV/0!	16	0	0	16	#DIV/0!
548	DNA helicase MCM9 OS=Homo sapiens GN=MCM9 PE=1 SV=4	MCM9_HUMAN	MCM9	127 kDa	0.43	8	[]	0	0	0	0	1	0	0	1	#DIV/0!	8	0	0	8	#DIV/0!
258	NADH-cytochrome b5 reductase 1 OS=Homo sapiens GN=CYB5R1 PE=1 SV=1	NB5R1_HUMAN	NB5R1	34 kDa	0.36	20	[]	0	0	0	0	1		0	1	#DIV/0!	19		1	20	#DIV/0!
575	Nucleoside diphosphate kinase 7 OS=Homo sapiens GN=NME7 PE=1 SV=1	NDK7_HUMAN	NDK7	42 kDa	0.44	7	[]	0	0	0	0	1			1	#DIV/0!	7		0	7	#DIV/0!
256	Nuclear pore complex protein Nup98-Nup96 OS=Homo sapiens GN=NUP98 PE=1 SV=4	NUP98_HUMAN	NUP98	198 kDa	0.36	16	[]	0	0	0	0	0	1	0	1	#DIV/0!	15	1	0	16	#DIV/0!
439	Phosphatidylinositol transfer protein beta isoform OS=Homo sapiens GN=PITPNB PE=1 SV=2	PIPNB_HUMAN	PIPNB	32 kDa	0.4	17	[]	0	0	0	0	1		0	1	#DIV/0!	17		0	17	#DIV/0!
473	Threonine--tRNA ligase, mitochondrial OS=Homo sapiens GN=TARS2 PE=1 SV=1	SYTM_HUMAN	SYTM	81 kDa	0.41	12	[]	0	0	0	0	0		1	1	#DIV/0!	12			12	#DIV/0!
505	Procollagen galactosyltransferase 1 OS=Homo sapiens GN=COLGALT1 PE=1 SV=1	GT251_HUMAN	GT251	72 kDa	0.42	10	[]	0	0		0	1		0	1	#DIV/0!	10	0		10	#DIV/0!
430	Heme-binding protein 1 OS=Homo sapiens GN=HEBP1 PE=1 SV=1	HEBP1_HUMAN	HEBP1	21 kDa	0.4	18	[]	0	0		0	1			1	#DIV/0!	18			18	#DIV/0!
508	UPF0160 protein MYG1, mitochondrial OS=Homo sapiens GN=C12orf10 PE=1 SV=2	MYG1_HUMAN	MYG1	42 kDa	0.42	10	[]	0	0		0	1			1	#DIV/0!	10	0		10	#DIV/0!
441	Proteasome subunit beta type-1 OS=Homo sapiens GN=PSMB1 PE=1 SV=2	PSB1_HUMAN	PSB1	26 kDa	0.4	17	[]	0	0		0	1		0	1	#DIV/0!	17			17	#DIV/0!
251	Alpha-globin transcription factor CP2 OS=Homo sapiens GN=TFCP2 PE=1 SV=2	TFCP2_HUMAN	TFCP2	57 kDa	0.36	15	[]	0	0		0	0	1	0	1	#DIV/0!	14	0	1	15	#DIV/0!
463	Tetratricopeptide repeat protein 37 OS=Homo sapiens GN=TTC37 PE=1 SV=1	TTC37_HUMAN	TTC37	175 kDa	0.41	14	[]	0	0		0	0	1	0	1	#DIV/0!	14	0	0	14	#DIV/0!
429	Heterogeneous nuclear ribonucleoprotein R OS=Homo sapiens GN=HNRNPR PE=1 SV=1	HNRPR_HUMAN	HNRPR	71 kDa	0.4	18	[]	0		0	0	1	0	0	1	#DIV/0!	18	0		18	#DIV/0!
252	GTPase NRas OS=Homo sapiens GN=NRAS PE=1 SV=1	RASN_HUMAN	RASN	21 kDa	0.36	15	[]	0		0	0	1	0		1	#DIV/0!	14	0	1	15	#DIV/0!
472	28S ribosomal protein S29, mitochondrial OS=Homo sapiens GN=DAP3 PE=1 SV=1	RT29_HUMAN	RT29	46 kDa	0.41	12	[]	0		0	0	1			1	#DIV/0!	12			12	#DIV/0!
417	General transcription factor 3C polypeptide 3 OS=Homo sapiens GN=GTF3C3 PE=1 SV=1	TF3C3_HUMAN	TF3C3	101 kDa	0.4	21	[]	0		0	0	0		1	1	#DIV/0!	21	0	0	21	#DIV/0!
457	5'-3' exoribonuclease 2 OS=Homo sapiens GN=XRN2 PE=1 SV=1	XRN2_HUMAN	XRN2	109 kDa	0.4	15	[]	0		0	0	1	0	0	1	#DIV/0!	15	0	0	15	#DIV/0!
129	ATP-binding cassette sub-family F member 3 OS=Homo sapiens GN=ABCF3 PE=1 SV=2	ABCF3_HUMAN	ABCF3	80 kDa	0.28	24	[]	0			0	1	0	0	1	#DIV/0!	20	0	4	24	#DIV/0!
391	Ankyrin repeat domain-containing protein 1 OS=Homo sapiens GN=ANKRD1 PE=1 SV=2	ANKR1_HUMAN	ANKR1	36 kDa	0.38	44	[]	0			0	1	0	0	1	#DIV/0!	44	0		44	#DIV/0!
113	Enhancer of mRNA-decapping protein 3 OS=Homo sapiens GN=EDC3 PE=1 SV=1	EDC3_HUMAN	EDC3	56 kDa	0.26	32	[]	0			0	0	1	0	1	#DIV/0!	26		6	32	#DIV/0!
408	S-formylglutathione hydrolase OS=Homo sapiens GN=ESD PE=1 SV=2	ESTD_HUMAN	ESTD	31 kDa	0.39	26	[]	0			0	0	1	0	1	#DIV/0!	26			26	#DIV/0!
526	Exocyst complex component 6 OS=Homo sapiens GN=EXOC6 PE=1 SV=3	EXOC6_HUMAN	EXOC6	94 kDa	0.43	9	[]	0			0	1	0		1	#DIV/0!	9	0		9	#DIV/0!
442	Inosine triphosphate pyrophosphatase OS=Homo sapiens GN=ITPA PE=1 SV=2	ITPA_HUMAN	ITPA	21 kDa	0.4	17	[]	0			0		1	0	1	#DIV/0!	17			17	#DIV/0!
616	Glycylpeptide N-tetradecanoyltransferase 1 OS=Homo sapiens GN=NMT1 PE=1 SV=2	NMT1_HUMAN	NMT1	57 kDa	0.46	6	[]	0			0	1			1	#DIV/0!	6			6	#DIV/0!
420	Nucleolar protein 58 OS=Homo sapiens GN=NOP58 PE=1 SV=1	NOP58_HUMAN	NOP58	60 kDa	0.4	20	[]	0			0	0	1	0	1	#DIV/0!	20		0	20	#DIV/0!
528	Ras-related protein Rab-24 OS=Homo sapiens GN=RAB24 PE=1 SV=1	RAB24_HUMAN	RAB24	23 kDa	0.43	9	[]	0			0	1			1	#DIV/0!	9			9	#DIV/0!
486	Small glutamine-rich tetratricopeptide repeat-containing protein alpha OS=Homo sapiens GN=SGTA PE=1 SV=1	SGTA_HUMAN	SGTA	34 kDa	0.42	11	[]	0			0	1			1	#DIV/0!	11		0	11	#DIV/0!
274	Structural maintenance of chromosomes protein 3 OS=Homo sapiens GN=SMC3 PE=1 SV=2	SMC3_HUMAN	SMC3	142 kDa	0.37	60	[]	0			0	1	0		1	#DIV/0!	59	1	0	60	#DIV/0!
458	E2 ubiquitin-conjugating enzyme OS=Homo sapiens GN=UBE2O PE=1 SV=3	sp|Q9C0C9|UBE2O_HUMAN	sp|Q9C0C9|UBE2O	141 kDa	0.4	15	[]	0			0	1		0	1	#DIV/0!	15			15	#DIV/0!
255	FACT complex subunit SPT16 OS=Homo sapiens GN=SUPT16H PE=1 SV=1	SP16H_HUMAN	SP16H	120 kDa	0.36	16	[]	0			0	1		0	1	#DIV/0!	15	0	1	16	#DIV/0!
245	Serine/threonine-protein kinase TBK1 OS=Homo sapiens GN=TBK1 PE=1 SV=1	TBK1_HUMAN	TBK1	84 kDa	0.36	11	[]	0			0	1			1	#DIV/0!	10		1	11	#DIV/0!
525	Guanine nucleotide exchange factor VAV2 OS=Homo sapiens GN=VAV2 PE=1 SV=2	VAV2_HUMAN	VAV2	101 kDa	0.43	9	[]	0			0	0	1	0	1	#DIV/0!	9			9	#DIV/0!
468	Peptidyl-prolyl cis-trans isomerase FKBP5 OS=Homo sapiens GN=FKBP5 PE=1 SV=2	FKBP5_HUMAN	FKBP5	51 kDa	0.41	13	[]		0		0	1	0	0	1	#DIV/0!	13	0		13	#DIV/0!
409	Serine/threonine-protein phosphatase 2A 56 kDa regulatory subunit delta isoform OS=Homo sapiens GN=PPP2R5D PE=1 SV=1	2A5D_HUMAN	2A5D	70 kDa	0.39	25	[]				0	1			1	#DIV/0!	25	0	0	25	#DIV/0!
431	7,8-dihydro-8-oxoguanine triphosphatase OS=Homo sapiens GN=NUDT1 PE=1 SV=3	8ODP_HUMAN	8ODP	23 kDa	0.4	18	[]				0	1			1	#DIV/0!	18			18	#DIV/0!
432	Protein arginine N-methyltransferase 5 OS=Homo sapiens GN=PRMT5 PE=1 SV=4	ANM5_HUMAN	ANM5	73 kDa	0.4	18	[]				0	1	0		1	#DIV/0!	18	0		18	#DIV/0!
462	Malate dehydrogenase, cytoplasmic OS=Homo sapiens GN=MDH1 PE=1 SV=4	MDHC_HUMAN	MDHC	36 kDa	0.41	14	[]				0	1			1	#DIV/0!	14		0	14	#DIV/0!
410	NudC domain-containing protein 2 OS=Homo sapiens GN=NUDCD2 PE=1 SV=1	NUDC2_HUMAN	NUDC2	18 kDa	0.39	23	[]				0	1			1	#DIV/0!	23			23	#DIV/0!
524	2',5'-phosphodiesterase 12 OS=Homo sapiens GN=PDE12 PE=1 SV=2	PDE12_HUMAN	PDE12	67 kDa	0.43	9	[]				0	0	0	1	1	#DIV/0!	9		0	9	#DIV/0!
450	28S ribosomal protein S27, mitochondrial OS=Homo sapiens GN=MRPS27 PE=1 SV=3	RT27_HUMAN	RT27	48 kDa	0.4	16	[]				0	0	1		1	#DIV/0!	16			16	#DIV/0!
382	Probable ATP-dependent RNA helicase DDX6 OS=Homo sapiens GN=DDX6 PE=1 SV=2	DDX6_HUMAN	DDX6	54 kDa	0.38	18	[]	0	0	0	0	2	0	0	2	#DIV/0!	34	0	1	35	#DIV/0!
581	Nuclear receptor coactivator 4 OS=Homo sapiens GN=NCOA4 PE=1 SV=1	NCOA4_HUMAN	NCOA4	70 kDa	0.45	3.5	[]	0	0	0	0	0	2	0	2	#DIV/0!	6	0	1	7	#DIV/0!
392	Opioid growth factor receptor OS=Homo sapiens GN=OGFR PE=1 SV=3	OGFR_HUMAN	OGFR	73 kDa	0.38	11	[]	0	0	0	0	0	1	1	2	#DIV/0!	22	1	0	23	#DIV/0!
550	39S ribosomal protein L3, mitochondrial OS=Homo sapiens GN=MRPL3 PE=1 SV=1	RM03_HUMAN	RM03	39 kDa	0.43	8	[]	0	0	0	0	2			2	#DIV/0!	16			16	#DIV/0!
416	E3 ubiquitin-protein ligase RNF213 OS=Homo sapiens GN=RNF213 PE=1 SV=3	RN213_HUMAN	RN213	591 kDa	0.4	21	[]	0	0	0	0	2	0	0	2	#DIV/0!	42	0	0	42	#DIV/0!
204	Elongator complex protein 1 OS=Homo sapiens GN=IKBKAP PE=1 SV=3	ELP1_HUMAN	ELP1	150 kDa	0.33	29	[]	0	0		0	0	0	2	2	#DIV/0!	54	0	5	59	#DIV/0!
402	Methyltransferase-like protein 13 OS=Homo sapiens GN=METTL13 PE=1 SV=1	MET13_HUMAN	MET13	79 kDa	0.39	8.5	[]	0	0		0	1	1	0	2	#DIV/0!	16	0	1	17	#DIV/0!
534	Atypical kinase ADCK3, mitochondrial OS=Homo sapiens GN=ADCK3 PE=1 SV=1	ADCK3_HUMAN	ADCK3	72 kDa	0.43	8.5	[]	0		0	0	0		2	2	#DIV/0!	17			17	#DIV/0!
395	Gamma-glutamyltransferase 7 OS=Homo sapiens GN=GGT7 PE=1 SV=2	GGT7_HUMAN	GGT7	70 kDa	0.39	11	[]	0		0	0	1	1		2	#DIV/0!	1	20		21	#DIV/0!
564	Adenylosuccinate synthetase isozyme 2 OS=Homo sapiens GN=ADSS PE=1 SV=3	PURA2_HUMAN	PURA2	50 kDa	0.44	7.5	[]	0		0	0	0	2	0	2	#DIV/0!	15	0		15	#DIV/0!
677	Rab-like protein 3 OS=Homo sapiens GN=RABL3 PE=1 SV=1	RABL3_HUMAN	RABL3	26 kDa	0.49	4.5	[]	0		0	0	0	2	0	2	#DIV/0!	0	9	0	9	#DIV/0!
426	Mitochondrial import inner membrane translocase subunit TIM44 OS=Homo sapiens GN=TIMM44 PE=1 SV=2	TIM44_HUMAN	TIM44	51 kDa	0.4	18	[]	0		0	0	1	1	0	2	#DIV/0!	37	0	0	37	#DIV/0!
837	UPF0488 protein C8orf33 OS=Homo sapiens GN=C8orf33 PE=1 SV=1	CH033_HUMAN	CH033	25 kDa	0.56	3	[]	0			0	2	0		2	#DIV/0!	6			6	#DIV/0!
27	Hemoglobin subunit alpha OS=Homo sapiens GN=HBA1 PE=1 SV=2	HBA_HUMAN	HBA	15 kDa	0.11	18	[]	0			0	2		0	2	#DIV/0!	18	1	17	36	#DIV/0!
401	RNA-binding protein 4 OS=Homo sapiens GN=RBM4 PE=1 SV=1	RBM4_HUMAN	RBM4	40 kDa	0.39	29	[]	0			0	2			2	#DIV/0!	57	0	0	57	#DIV/0!
387	DNA-directed RNA polymerases I and III subunit RPAC1 OS=Homo sapiens GN=POLR1C PE=1 SV=1	RPAC1_HUMAN	RPAC1	39 kDa	0.38	15	[]	0			0	2	0	0	2	#DIV/0!	29	0	1	30	#DIV/0!
155	28S ribosomal protein S2, mitochondrial OS=Homo sapiens GN=MRPS2 PE=1 SV=1	RT02_HUMAN	RT02	33 kDa	0.3	22	[]	0			0	1	0	1	2	#DIV/0!	38	0	6	44	#DIV/0!
594	28S ribosomal protein S11, mitochondrial OS=Homo sapiens GN=MRPS11 PE=1 SV=2	RT11_HUMAN	RT11	21 kDa	0.45	6.5	[]	0			0	2		0	2	#DIV/0!	13			13	#DIV/0!
506	THO complex subunit 3 OS=Homo sapiens GN=THOC3 PE=1 SV=1	THOC3_HUMAN	THOC3	39 kDa	0.42	10	[]	0			0	2	0	0	2	#DIV/0!	20			20	#DIV/0!
181	WD repeat-containing protein 18 OS=Homo sapiens GN=WDR18 PE=1 SV=2	WDR18_HUMAN	WDR18	47 kDa	0.32	16	[]	0			0	1	0	1	2	#DIV/0!	14	0	2	16	#DIV/0!
592	Replication factor C subunit 5 OS=Homo sapiens GN=RFC5 PE=1 SV=1	RFC5_HUMAN	RFC5	38 kDa	0.45	6.5	[]		0	0	0	2	0		2	#DIV/0!	13		0	13	#DIV/0!
407	TBC1 domain family member 15 OS=Homo sapiens GN=TBC1D15 PE=1 SV=2	TBC15_HUMAN	TBC15	79 kDa	0.39	26	[]		0		0	2	0	0	2	#DIV/0!	52	0	0	52	#DIV/0!
726	Soluble calcium-activated nucleotidase 1 OS=Homo sapiens GN=CANT1 PE=1 SV=1	CANT1_HUMAN	CANT1	45 kDa	0.51	4	[]				0	0	2	0	2	#DIV/0!	0	8		8	#DIV/0!
576	Mitogen-activated protein kinase 1 OS=Homo sapiens GN=MAPK1 PE=1 SV=3	MK01_HUMAN	MK01	41 kDa	0.44	7	[]				0		2		2	#DIV/0!	7			7	#DIV/0!
552	Parkinson disease 7 domain-containing protein 1 OS=Homo sapiens GN=PDDC1 PE=1 SV=1	PDDC1_HUMAN	PDDC1	23 kDa	0.43	8	[]				0	2	0		2	#DIV/0!	16			16	#DIV/0!
464	Peptidyl-prolyl cis-trans isomerase H OS=Homo sapiens GN=PPIH PE=1 SV=1	PPIH_HUMAN	PPIH	19 kDa	0.41	14	[]				0	2			2	#DIV/0!	28			28	#DIV/0!
551	Ras-related protein Ral-A OS=Homo sapiens GN=RALA PE=1 SV=1	RALA_HUMAN	RALA	24 kDa	0.43	8	[]				0	2			2	#DIV/0!	0	16		16	#DIV/0!
507	Ribonuclease H2 subunit A OS=Homo sapiens GN=RNASEH2A PE=1 SV=2	RNH2A_HUMAN	RNH2A	33 kDa	0.42	10	[]				0	2	0		2	#DIV/0!	20			20	#DIV/0!
1378	Protein bicaudal D homolog 2 OS=Homo sapiens GN=BICD2 PE=1 SV=1	BICD2_HUMAN	BICD2	94 kDa	0.83	1.3	[]	0	0	0	0	1	2	0	3	#DIV/0!	4	0		4	#DIV/0!
148	Dynein assembly factor 5, axonemal OS=Homo sapiens GN=DNAAF5 PE=1 SV=4	DAAF5_HUMAN	DAAF5	94 kDa	0.3	20	[]	0	0	0	0	3	0	0	3	#DIV/0!	52	0	9	61	#DIV/0!
753	DNA (cytosine-5)-methyltransferase 1 OS=Homo sapiens GN=DNMT1 PE=1 SV=2	DNMT1_HUMAN	DNMT1	183 kDa	0.52	3.7	[]	0	0	0	0	3	0	0	3	#DIV/0!	11	0	0	11	#DIV/0!
691	Enhancer of mRNA-decapping protein 4 OS=Homo sapiens GN=EDC4 PE=1 SV=1	EDC4_HUMAN	EDC4	152 kDa	0.5	4.3	[]	0	0	0	0	0	3	0	3	#DIV/0!	13		0	13	#DIV/0!
545	Unconventional myosin-Ic OS=Homo sapiens GN=MYO1C PE=1 SV=4	MYO1C_HUMAN	MYO1C	122 kDa	0.43	4.7	[]	0	0	0	0	1	2	0	3	#DIV/0!	13		1	14	#DIV/0!
813	Protein O-GlcNAcase OS=Homo sapiens GN=MGEA5 PE=1 SV=2	OGA_HUMAN	OGA	103 kDa	0.55	3	[]	0	0	0	0	0	1	2	3	#DIV/0!	9	0	0	9	#DIV/0!
556	Squamous cell carcinoma antigen recognized by T-cells 3 OS=Homo sapiens GN=SART3 PE=1 SV=1	SART3_HUMAN	SART3	110 kDa	0.43	8	[]	0	0	0	0	0	3	0	3	#DIV/0!	24	0	0	24	#DIV/0!
470	Transducin beta-like protein 3 OS=Homo sapiens GN=TBL3 PE=1 SV=2	TBL3_HUMAN	TBL3	89 kDa	0.41	3.3	[]	0	0	0	0	0	3	0	3	#DIV/0!	8	1	1	10	#DIV/0!
167	Uridine-cytidine kinase 2 OS=Homo sapiens GN=UCK2 PE=1 SV=1	UCK2_HUMAN	UCK2	29 kDa	0.31	7	[]	0	0	0	0	1	2	0	3	#DIV/0!	17		4	21	#DIV/0!
207	Dynamin-1 OS=Homo sapiens GN=DNM1 PE=1 SV=2	DYN1_HUMAN	DYN1	97 kDa	0.33	5	[]	0	0		0	0	2	1	3	#DIV/0!	12	0	3	15	#DIV/0!
569	Ferritin heavy chain OS=Homo sapiens GN=FTH1 PE=1 SV=2	FRIH_HUMAN	FRIH	21 kDa	0.44	7.3	[]	0	0		0	3			3	#DIV/0!	22		0	22	#DIV/0!
12	Interleukin-1 receptor-associated kinase 1 OS=Homo sapiens GN=IRAK1 PE=1 SV=2	IRAK1_HUMAN	IRAK1	77 kDa	0.084	INF	[]	0	0		0	2	1	0	3	#DIV/0!	10	1	6	17	#DIV/0!
838	Microtubule-associated protein 1S OS=Homo sapiens GN=MAP1S PE=1 SV=2	MAP1S_HUMAN	MAP1S	112 kDa	0.56	3	[]	0	0		0	0	3	0	3	#DIV/0!	9	0	0	9	#DIV/0!
600	Signal recognition particle 14 kDa protein OS=Homo sapiens GN=SRP14 PE=1 SV=2	SRP14_HUMAN	SRP14	15 kDa	0.45	6.3	[]	0	0		0	3		0	3	#DIV/0!	19		0	19	#DIV/0!
423	Eukaryotic translation initiation factor 5B OS=Homo sapiens GN=EIF5B PE=1 SV=4	IF2P_HUMAN	IF2P	139 kDa	0.4	20	[]	0		0	0	3	0	0	3	#DIV/0!	59	0	0	59	#DIV/0!
237	Importin subunit alpha-7 OS=Homo sapiens GN=KPNA6 PE=1 SV=1	IMA7_HUMAN	IMA7	60 kDa	0.35	9.3	[]	0		0	0	2	1	0	3	#DIV/0!	25	0	3	28	#DIV/0!
501	Protein RCC2 OS=Homo sapiens GN=RCC2 PE=1 SV=2	RCC2_HUMAN	RCC2	56 kDa	0.42	10	[]	0		0	0	1	2	0	3	#DIV/0!	30			30	#DIV/0!
425	Leucine-rich repeat-containing protein 47 OS=Homo sapiens GN=LRRC47 PE=1 SV=1	LRC47_HUMAN	LRC47	63 kDa	0.4	19	[]	0			0	3	0		3	#DIV/0!	58			58	#DIV/0!
588	NADH dehydrogenase [ubiquinone] 1 alpha subcomplex assembly factor 4 OS=Homo sapiens GN=NDUFAF4 PE=1 SV=1	NDUF4_HUMAN	NDUF4	20 kDa	0.45	6.7	[]	0			0	3	0		3	#DIV/0!	20	0	0	20	#DIV/0!
755	NADH dehydrogenase [ubiquinone] iron-sulfur protein 7, mitochondrial OS=Homo sapiens GN=NDUFS7 PE=1 SV=3	NDUS7_HUMAN	NDUS7	24 kDa	0.52	3.7	[]	0			0	3			3	#DIV/0!	11			11	#DIV/0!
478	40S ribosomal protein S27 OS=Homo sapiens GN=RPS27 PE=1 SV=3	RS27_HUMAN	RS27	9 kDa	0.41	12	[]	0			0	3			3	#DIV/0!	35			35	#DIV/0!
815	28S ribosomal protein S30, mitochondrial OS=Homo sapiens GN=MRPS30 PE=1 SV=2	RT30_HUMAN	RT30	50 kDa	0.55	3	[]	0			0		1	2	3	#DIV/0!	9			9	#DIV/0!
604	E3 UFM1-protein ligase 1 OS=Homo sapiens GN=UFL1 PE=1 SV=2	UFL1_HUMAN	UFL1	90 kDa	0.45	6	[]	0			0	2	1	0	3	#DIV/0!	18			18	#DIV/0!
1273	Glucose-6-phosphate isomerase OS=Homo sapiens GN=GPI PE=1 SV=4	G6PI_HUMAN	G6PI	63 kDa	0.77	0.7	[]		0	0	0	3	0		3	#DIV/0!	0	1	1	2	#DIV/0!
601	ATPase family AAA domain-containing protein 1 OS=Homo sapiens GN=ATAD1 PE=1 SV=1	ATAD1_HUMAN	ATAD1	41 kDa	0.45	6.3	[]			0	0	3	0	0	3	#DIV/0!	19	0		19	#DIV/0!
436	Peptidyl-prolyl cis-trans isomerase-like 1 OS=Homo sapiens GN=PPIL1 PE=1 SV=1	PPIL1_HUMAN	PPIL1	18 kDa	0.4	18	[]			0	0	3	0		3	#DIV/0!	53			53	#DIV/0!
482	Aminoacyl tRNA synthase complex-interacting multifunctional protein 1 OS=Homo sapiens GN=AIMP1 PE=1 SV=2	AIMP1_HUMAN	AIMP1	34 kDa	0.42	11	[]				0	3			3	#DIV/0!	34		0	34	#DIV/0!
527	Transcription elongation factor B polypeptide 2 OS=Homo sapiens GN=TCEB2 PE=1 SV=1	ELOB_HUMAN	ELOB	13 kDa	0.43	9	[]				0	3	0		3	#DIV/0!	27			27	#DIV/0!
522	Exosome complex component CSL4 OS=Homo sapiens GN=EXOSC1 PE=1 SV=1	EXOS1_HUMAN	EXOS1	21 kDa	0.42	9.3	[]				0	3			3	#DIV/0!	28			28	#DIV/0!
692	RNA-binding protein NOB1 OS=Homo sapiens GN=NOB1 PE=1 SV=1	NOB1_HUMAN	NOB1	47 kDa	0.5	4.3	[]				0	3			3	#DIV/0!	13		0	13	#DIV/0!
814	Nitric oxide synthase-interacting protein OS=Homo sapiens GN=NOSIP PE=1 SV=1	NOSIP_HUMAN	NOSIP	33 kDa	0.55	3	[]				0	2		1	3	#DIV/0!	9	0		9	#DIV/0!
754	Phostensin OS=Homo sapiens GN=PPP1R18 PE=1 SV=1	PPR18_HUMAN	PPR18	68 kDa	0.52	3.7	[]				0	0	3	0	3	#DIV/0!	11	0	0	11	#DIV/0!
645	Histone-binding protein RBBP7 OS=Homo sapiens GN=RBBP7 PE=1 SV=1	RBBP7_HUMAN	RBBP7	48 kDa	0.48	5	[]				0	3	0		3	#DIV/0!	15			15	#DIV/0!
602	S-phase kinase-associated protein 1 OS=Homo sapiens GN=SKP1 PE=1 SV=2	SKP1_HUMAN	SKP1	19 kDa	0.45	6.3	[]				0	3			3	#DIV/0!	19			19	#DIV/0!
724	Small acidic protein OS=Homo sapiens GN=SMAP PE=1 SV=1	SMAP_HUMAN	SMAP	20 kDa	0.51	4	[]				0	3	0	0	3	#DIV/0!	12	0	0	12	#DIV/0!
970	ATPase WRNIP1 OS=Homo sapiens GN=WRNIP1 PE=1 SV=2	WRIP1_HUMAN	WRIP1	72 kDa	0.63	2.3	[]				0	3	0		3	#DIV/0!	7		0	7	#DIV/0!
543	Eukaryotic translation initiation factor 3 subunit G OS=Homo sapiens GN=EIF3G PE=1 SV=2	EIF3G_HUMAN	EIF3G	36 kDa	0.43	8.2	[]	0	0	0	0	4		0	4	#DIV/0!	33		0	33	#DIV/0!
398	Signal recognition particle 54 kDa protein OS=Homo sapiens GN=SRP54 PE=1 SV=1	SRP54_HUMAN	SRP54	56 kDa	0.39	3.2	[]	0	0	0	0	3	1	0	4	#DIV/0!	10	3	0	13	#DIV/0!
855	Pre-mRNA-splicing factor SYF1 OS=Homo sapiens GN=XAB2 PE=1 SV=2	SYF1_HUMAN	SYF1	100 kDa	0.57	2.8	[]	0	0	0	0	1	3	0	4	#DIV/0!	11	0	0	11	#DIV/0!
461	Thymidylate synthase OS=Homo sapiens GN=TYMS PE=1 SV=3	TYSY_HUMAN	TYSY	36 kDa	0.41	14	[]	0	0	0	0	2	2	0	4	#DIV/0!	55	0	0	55	#DIV/0!
225	Bifunctional purine biosynthesis protein PURH OS=Homo sapiens GN=ATIC PE=1 SV=3	PUR9_HUMAN	PUR9	65 kDa	0.34	22	[]	0	0		0	4		0	4	#DIV/0!	80		7	87	#DIV/0!
650	Schlafen family member 11 OS=Homo sapiens GN=SLFN11 PE=1 SV=2	SLN11_HUMAN	SLN11	103 kDa	0.48	3.5	[]	0	0		0	3	0	1	4	#DIV/0!	13	0	1	14	#DIV/0!
579	Cat eye syndrome critical region protein 5 OS=Homo sapiens GN=CECR5 PE=1 SV=1	CECR5_HUMAN	CECR5	46 kDa	0.44	4.8	[]	0		0	0	3	1	0	4	#DIV/0!	18		1	19	#DIV/0!
585	Isovaleryl-CoA dehydrogenase, mitochondrial OS=Homo sapiens GN=IVD PE=1 SV=1	IVD_HUMAN	IVD	46 kDa	0.45	6.5	[]	0		0	0	2	0	2	4	#DIV/0!	26		0	26	#DIV/0!
571	Nuclear pore complex protein Nup160 OS=Homo sapiens GN=NUP160 PE=1 SV=3	NU160_HUMAN	NU160	162 kDa	0.44	5	[]	0		0	0	3	0	1	4	#DIV/0!	19	0	1	20	#DIV/0!
214	Eukaryotic translation initiation factor 3 subunit I OS=Homo sapiens GN=EIF3I PE=1 SV=1	EIF3I_HUMAN	EIF3I	37 kDa	0.34	11	[]	0			0	4		0	4	#DIV/0!	38	2	3	43	#DIV/0!
679	Adenylate kinase isoenzyme 1 OS=Homo sapiens GN=AK1 PE=1 SV=3	KAD1_HUMAN	KAD1	22 kDa	0.49	4.5	[]	0			0	4			4	#DIV/0!	18			18	#DIV/0!
712	N-alpha-acetyltransferase 10 OS=Homo sapiens GN=NAA10 PE=1 SV=1	NAA10_HUMAN	NAA10	26 kDa	0.5	3.2	[]	0			0	0	4	0	4	#DIV/0!	12	0	1	13	#DIV/0!
606	39S ribosomal protein L11, mitochondrial OS=Homo sapiens GN=MRPL11 PE=1 SV=1	RM11_HUMAN	RM11	21 kDa	0.45	6	[]	0			0	3		1	4	#DIV/0!	24			24	#DIV/0!
497	Trafficking protein particle complex subunit 3 OS=Homo sapiens GN=TRAPPC3 PE=1 SV=1	TPPC3_HUMAN	TPPC3	20 kDa	0.42	11	[]	0			0	4		0	4	#DIV/0!	42			42	#DIV/0!
646	Thioredoxin-like protein 1 OS=Homo sapiens GN=TXNL1 PE=1 SV=3	TXNL1_HUMAN	TXNL1	32 kDa	0.48	5	[]	0			0	4	0		4	#DIV/0!	20	0	0	20	#DIV/0!
674	Exportin-T OS=Homo sapiens GN=XPOT PE=1 SV=2	XPOT_HUMAN	XPOT	110 kDa	0.49	4.2	[]	0			0	2	2	0	4	#DIV/0!	17		0	17	#DIV/0!
1083	Glycogen synthase kinase-3 alpha OS=Homo sapiens GN=GSK3A PE=1 SV=2	GSK3A_HUMAN	GSK3A	51 kDa	0.68	2	[]		0	0	0	4	0	0	4	#DIV/0!	8		0	8	#DIV/0!
676	Actin-related protein 2/3 complex subunit 3 OS=Homo sapiens GN=ARPC3 PE=1 SV=3	ARPC3_HUMAN	ARPC3	21 kDa	0.49	4.5	[]		0		0	4			4	#DIV/0!	18		0	18	#DIV/0!
615	Asparagine synthetase [glutamine-hydrolyzing] OS=Homo sapiens GN=ASNS PE=1 SV=4	ASNS_HUMAN	ASNS	64 kDa	0.46	6	[]			0	0	4		0	4	#DIV/0!	24		0	24	#DIV/0!
836	Dephospho-CoA kinase domain-containing protein OS=Homo sapiens GN=DCAKD PE=1 SV=1	DCAKD_HUMAN	DCAKD	27 kDa	0.56	3	[]			0	0	4	0	0	4	#DIV/0!	12			12	#DIV/0!
1327	Large proline-rich protein BAG6 OS=Homo sapiens GN=BAG6 PE=1 SV=2	BAG6_HUMAN	BAG6	119 kDa	0.8	1.5	[]				0	0	4		4	#DIV/0!	6			6	#DIV/0!
749	RNA-binding protein PNO1 OS=Homo sapiens GN=PNO1 PE=1 SV=1	PNO1_HUMAN	PNO1	28 kDa	0.52	3.8	[]				0	4	0		4	#DIV/0!	15			15	#DIV/0!
699	39S ribosomal protein L37, mitochondrial OS=Homo sapiens GN=MRPL37 PE=1 SV=2	RM37_HUMAN	RM37	48 kDa	0.5	4.2	[]				0	4	0		4	#DIV/0!	17		0	17	#DIV/0!
596	3-ketoacyl-CoA thiolase, mitochondrial OS=Homo sapiens GN=ACAA2 PE=1 SV=2	THIM_HUMAN	THIM	42 kDa	0.45	6.2	[]				0	1		3	4	#DIV/0!	25	0	0	25	#DIV/0!
166	Protein unc-45 homolog A OS=Homo sapiens GN=UNC45A PE=1 SV=1	UN45A_HUMAN	UN45A	103 kDa	0.31	25	[]				0	4			4	#DIV/0!	87		12	99	#DIV/0!
773	Uridine phosphorylase 1 OS=Homo sapiens GN=UPP1 PE=1 SV=1	UPP1_HUMAN	UPP1	34 kDa	0.53	3.5	[]				0	4			4	#DIV/0!	14		0	14	#DIV/0!
625	Baculoviral IAP repeat-containing protein 6 OS=Homo sapiens GN=BIRC6 PE=1 SV=2	BIRC6_HUMAN	BIRC6	530 kDa	0.46	5.4	[]	0	0	0	0	3	2	0	5	#DIV/0!	27	0	0	27	#DIV/0!
672	General transcription factor II-I OS=Homo sapiens GN=GTF2I PE=1 SV=2	GTF2I_HUMAN	GTF2I	112 kDa	0.49	4.2	[]	0	0	0	0	2	2	1	5	#DIV/0!	21	0	0	21	#DIV/0!
542	Melanoma-associated antigen D2 OS=Homo sapiens GN=MAGED2 PE=1 SV=2	MAGD2_HUMAN	MAGD2	65 kDa	0.43	6	[]	0	0	0	0	2	0	3	5	#DIV/0!	29	1	0	30	#DIV/0!
1661	Oxysterol-binding protein 1 OS=Homo sapiens GN=OSBP PE=1 SV=1	OSBP1_HUMAN	OSBP1	89 kDa	1	1	[]	0	0	0	0	5	0	0	5	#DIV/0!	2	3	0	5	#DIV/0!
455	Presequence protease, mitochondrial OS=Homo sapiens GN=PITRM1 PE=1 SV=3	PREP_HUMAN	PREP	117 kDa	0.4	7.2	[]	0	0	0	0	1	0	4	5	#DIV/0!	34		2	36	#DIV/0!
801	Tyrosine--tRNA ligase, mitochondrial OS=Homo sapiens GN=YARS2 PE=1 SV=2	SYYM_HUMAN	SYYM	53 kDa	0.54	3	[]	0	0	0	0	2	2	1	5	#DIV/0!	15	0	0	15	#DIV/0!
882	Gephyrin OS=Homo sapiens GN=GPHN PE=1 SV=1	GEPH_HUMAN	GEPH	80 kDa	0.59	2.6	[]	0	0		0	4		1	5	#DIV/0!	13	0		13	#DIV/0!
966	Exportin-5 OS=Homo sapiens GN=XPO5 PE=1 SV=1	XPO5_HUMAN	XPO5	136 kDa	0.62	2.2	[]	0	0		0	2	3	0	5	#DIV/0!	11		0	11	#DIV/0!
379	Eukaryotic translation initiation factor 3 subunit B OS=Homo sapiens GN=EIF3B PE=1 SV=3	EIF3B_HUMAN	EIF3B	92 kDa	0.38	11	[]	0		0	0	1	3	1	5	#DIV/0!	54	0	3	57	#DIV/0!
1034	1-phosphatidylinositol 4,5-bisphosphate phosphodiesterase beta-4 OS=Homo sapiens GN=PLCB4 PE=1 SV=3	PLCB4_HUMAN	PLCB4	134 kDa	0.66	1.8	[]	0		0	0	4	0	1	5	#DIV/0!	1	8	0	9	#DIV/0!
705	Serine/threonine-protein phosphatase 2A catalytic subunit alpha isoform OS=Homo sapiens GN=PPP2CA PE=1 SV=1	PP2AA_HUMAN	PP2AA	36 kDa	0.5	4.2	[]	0			0	5		0	5	#DIV/0!	21			21	#DIV/0!
703	Tumor suppressor p53-binding protein 1 OS=Homo sapiens GN=TP53BP1 PE=1 SV=2	TP53B_HUMAN	TP53B	214 kDa	0.5	4.2	[]	0			0	5	0		5	#DIV/0!	21	0	0	21	#DIV/0!
716	Zinc finger protein 622 OS=Homo sapiens GN=ZNF622 PE=1 SV=1	ZN622_HUMAN	ZN622	54 kDa	0.5	2.4	[]	0			0	2	3	0	5	#DIV/0!	10	0	2	12	#DIV/0!
783	39S ribosomal protein L13, mitochondrial OS=Homo sapiens GN=MRPL13 PE=1 SV=1	RM13_HUMAN	RM13	21 kDa	0.54	3.4	[]				0	5	0	0	5	#DIV/0!	17			17	#DIV/0!
261	Ankyrin repeat and LEM domain-containing protein 2 OS=Homo sapiens GN=ANKLE2 PE=1 SV=4	ANKL2_HUMAN	ANKL2	104 kDa	0.36	4.2	[]	0	0	0	0	5	1	0	6	#DIV/0!	20	5	0	25	#DIV/0!
617	Basic leucine zipper and W2 domain-containing protein 1 OS=Homo sapiens GN=BZW1 PE=1 SV=1	BZW1_HUMAN	BZW1	48 kDa	0.46	4	[]	0	0	0	0	6			6	#DIV/0!	22		2	24	#DIV/0!
515	ATP-dependent RNA helicase DDX1 OS=Homo sapiens GN=DDX1 PE=1 SV=2	DDX1_HUMAN	DDX1	82 kDa	0.42	9.7	[]	0	0	0	0	6	0	0	6	#DIV/0!	58	0	0	58	#DIV/0!
422	E3 ubiquitin-protein ligase HECTD1 OS=Homo sapiens GN=HECTD1 PE=1 SV=3	HECD1_HUMAN	HECD1	289 kDa	0.4	6.2	[]	0	0	0	0	4	2	0	6	#DIV/0!	34	2	1	37	#DIV/0!
394	Leucine zipper protein 1 OS=Homo sapiens GN=LUZP1 PE=1 SV=2	LUZP1_HUMAN	LUZP1	120 kDa	0.39	4.5	[]	0	0	0	0	0	2	4	6	#DIV/0!	23	0	4	27	#DIV/0!
195	Nuclear pore complex protein Nup93 OS=Homo sapiens GN=NUP93 PE=1 SV=2	NUP93_HUMAN	NUP93	93 kDa	0.32	6.7	[]	0	0	0	0	4	2	0	6	#DIV/0!	33	0	7	40	#DIV/0!
619	tRNA-splicing ligase RtcB homolog OS=Homo sapiens GN=RTCB PE=1 SV=1	RTCB_HUMAN	RTCB	55 kDa	0.46	5.7	[]	0	0	0	0	2	4	0	6	#DIV/0!	34		0	34	#DIV/0!
383	Ribonucleoside-diphosphate reductase large subunit OS=Homo sapiens GN=RRM1 PE=1 SV=1	RIR1_HUMAN	RIR1	90 kDa	0.38	17	[]	0	0		0	6	0	0	6	#DIV/0!	96		3	99	#DIV/0!
1663	Annexin A6 OS=Homo sapiens GN=ANXA6 PE=1 SV=3	ANXA6_HUMAN	ANXA6	76 kDa	1	1	[]	0		0	0	5	1	0	6	#DIV/0!	6	0	0	6	#DIV/0!
648	Tether containing UBX domain for GLUT4 OS=Homo sapiens GN=ASPSCR1 PE=1 SV=1	ASPC1_HUMAN	ASPC1	60 kDa	0.48	4.2	[]	0		0	0	6	0		6	#DIV/0!	24		1	25	#DIV/0!
789	Protein FAM135A OS=Homo sapiens GN=FAM135A PE=1 SV=2	F135A_HUMAN	F135A	170 kDa	0.54	3.2	[]	0			0	4	2	0	6	#DIV/0!	0	19	0	19	#DIV/0!
905	Glutathione S-transferase kappa 1 OS=Homo sapiens GN=GSTK1 PE=1 SV=3	GSTK1_HUMAN	GSTK1	25 kDa	0.6	2.5	[]	0			0	5	1	0	6	#DIV/0!	15			15	#DIV/0!
948	Protein KTI12 homolog OS=Homo sapiens GN=KTI12 PE=1 SV=1	KTI12_HUMAN	KTI12	39 kDa	0.62	2.3	[]	0			0	5	1		6	#DIV/0!	14	0		14	#DIV/0!
532	La-related protein 4 OS=Homo sapiens GN=LARP4 PE=1 SV=3	LARP4_HUMAN	LARP4	81 kDa	0.43	4.8	[]	0			0	4	1	1	6	#DIV/0!	27	0	2	29	#DIV/0!
1090	PDZ and LIM domain protein 7 OS=Homo sapiens GN=PDLIM7 PE=1 SV=1	PDLI7_HUMAN	PDLI7	50 kDa	0.68	0.5	[]	0			0	6			6	#DIV/0!	3			3	#DIV/0!
934	Pescadillo homolog OS=Homo sapiens GN=PES1 PE=1 SV=1	PESC_HUMAN	PESC	68 kDa	0.61	2.3	[]	0			0	2	4		6	#DIV/0!	14	0		14	#DIV/0!
790	Prolyl endopeptidase OS=Homo sapiens GN=PREP PE=1 SV=2	PPCE_HUMAN	PPCE	81 kDa	0.54	3.2	[]	0			0	4	2	0	6	#DIV/0!	19			19	#DIV/0!
570	Profilin-1 OS=Homo sapiens GN=PFN1 PE=1 SV=2	PROF1_HUMAN	PROF1	15 kDa	0.44	7.3	[]	0			0	6			6	#DIV/0!	44			44	#DIV/0!
370	Ras association domain-containing protein 8 OS=Homo sapiens GN=RASSF8 PE=1 SV=2	RASF8_HUMAN	RASF8	48 kDa	0.37	0	[]	0			0	6			6	#DIV/0!	0			0	#DIV/0!
756	Metalloproteinase inhibitor 1 OS=Homo sapiens GN=TIMP1 PE=1 SV=1	TIMP1_HUMAN	TIMP1	23 kDa	0.52	3.7	[]	0			0	6			6	#DIV/0!	22			22	#DIV/0!
725	Glutathione peroxidase 1 OS=Homo sapiens GN=GPX1 PE=1 SV=4	GPX1_HUMAN	GPX1	22 kDa	0.51	4	[]				0	6			6	#DIV/0!	24			24	#DIV/0!
971	N-alpha-acetyltransferase 50 OS=Homo sapiens GN=NAA50 PE=1 SV=1	NAA50_HUMAN	NAA50	19 kDa	0.63	2.3	[]				0	6			6	#DIV/0!	14			14	#DIV/0!
1405	Anoctamin-10 OS=Homo sapiens GN=ANO10 PE=1 SV=2	ANO10_HUMAN	ANO10	76 kDa	0.85	1.3	[]	0	0	0	0	4	3	0	7	#DIV/0!	0	9	0	9	#DIV/0!
1440	Beta-adrenergic receptor kinase 1 OS=Homo sapiens GN=ADRBK1 PE=1 SV=2	ARBK1_HUMAN	ARBK1	80 kDa	0.87	1.1	[]	0	0	0	0	4	3	0	7	#DIV/0!	5	3	0	8	#DIV/0!
658	Armadillo repeat-containing protein 6 OS=Homo sapiens GN=ARMC6 PE=1 SV=2	ARMC6_HUMAN	ARMC6	54 kDa	0.48	4.1	[]	0	0	0	0	7	0	0	7	#DIV/0!	28	0	1	29	#DIV/0!
521	Ubiquitin carboxyl-terminal hydrolase isozyme L5 OS=Homo sapiens GN=UCHL5 PE=1 SV=3	UCHL5_HUMAN	UCHL5	38 kDa	0.42	4.3	[]	0	0	0	0	3	4	0	7	#DIV/0!	27	0	3	30	#DIV/0!
1368	Serine/threonine-protein kinase WNK1 OS=Homo sapiens GN=WNK1 PE=1 SV=2	WNK1_HUMAN	WNK1	251 kDa	0.82	1.1	[]	0	0	0	0	3	2	2	7	#DIV/0!	4		4	8	#DIV/0!
807	Constitutive coactivator of PPAR-gamma-like protein 1 OS=Homo sapiens GN=FAM120A PE=1 SV=2	F120A_HUMAN	F120A	122 kDa	0.55	2.4	[]	0	0		0	1	6	0	7	#DIV/0!	15	0	2	17	#DIV/0!
1233	Kinesin-like protein KIF2A OS=Homo sapiens GN=KIF2A PE=1 SV=3	KIF2A_HUMAN	KIF2A	80 kDa	0.75	1.6	[]	0	0		0	0	7	0	7	#DIV/0!	10		1	11	#DIV/0!
639	Pre-mRNA-processing factor 19 OS=Homo sapiens GN=PRPF19 PE=1 SV=1	PRP19_HUMAN	PRP19	55 kDa	0.47	5	[]	0	0		0	0	1	6	7	#DIV/0!	35		0	35	#DIV/0!
862	Bifunctional methylenetetrahydrofolate dehydrogenase/cyclohydrolase, mitochondrial OS=Homo sapiens GN=MTHFD2 PE=1 SV=2	MTDC_HUMAN	MTDC	38 kDa	0.58	2.6	[]	0		0	0	4	1	2	7	#DIV/0!	18		0	18	#DIV/0!
665	Splicing factor U2AF 35 kDa subunit OS=Homo sapiens GN=U2AF1 PE=1 SV=3	U2AF1_HUMAN	U2AF1	28 kDa	0.49	3.3	[]	0		0	0	1	6		7	#DIV/0!	21	0	2	23	#DIV/0!
1515	Anthrax toxin receptor 1 OS=Homo sapiens GN=ANTXR1 PE=1 SV=2	ANTR1_HUMAN	ANTR1	63 kDa	0.91	1.1	[]	0			0	4	2	1	7	#DIV/0!		8		8	#DIV/0!
870	Protein Red OS=Homo sapiens GN=IK PE=1 SV=3	RED_HUMAN	RED	66 kDa	0.58	2	[]	0			0	3	4	0	7	#DIV/0!	12	2		14	#DIV/0!
1213	Thyroid receptor-interacting protein 6 OS=Homo sapiens GN=TRIP6 PE=1 SV=3	TRIP6_HUMAN	TRIP6	50 kDa	0.74	1.6	[]	0			0	4	2	1	7	#DIV/0!	11			11	#DIV/0!
411	Fructose-bisphosphate aldolase A OS=Homo sapiens GN=ALDOA PE=1 SV=2	ALDOA_HUMAN	ALDOA	39 kDa	0.39	9.9	[]		0	0	0	7	0	0	7	#DIV/0!	66	1	2	69	#DIV/0!
67	Serine/threonine-protein kinase OSR1 OS=Homo sapiens GN=OXSR1 PE=1 SV=1	OXSR1_HUMAN	OXSR1	58 kDa	0.18	0	[]			0	0	5	2	0	7	#DIV/0!	0		0	0	#DIV/0!
869	Protein LSM12 homolog OS=Homo sapiens GN=LSM12 PE=1 SV=2	LSM12_HUMAN	LSM12	22 kDa	0.58	2.6	[]				0	4	3	0	7	#DIV/0!	18	0	0	18	#DIV/0!
733	Nucleolar protein 56 OS=Homo sapiens GN=NOP56 PE=1 SV=4	NOP56_HUMAN	NOP56	66 kDa	0.51	3.3	[]				0		6	1	7	#DIV/0!	22		1	23	#DIV/0!
567	Ankyrin repeat and KH domain-containing protein 1 OS=Homo sapiens GN=ANKHD1 PE=1 SV=1	ANKH1_HUMAN	ANKH1	269 kDa	0.44	3.2	[]	0	0	0	0	2	6	0	8	#DIV/0!	22		4	26	#DIV/0!
627	Rho guanine nucleotide exchange factor 2 OS=Homo sapiens GN=ARHGEF2 PE=1 SV=4	ARHG2_HUMAN	ARHG2	112 kDa	0.47	3.8	[]	0	0	0	0	1	5	2	8	#DIV/0!	28	0	2	30	#DIV/0!
171	Coatomer subunit beta' OS=Homo sapiens GN=COPB2 PE=1 SV=2	COPB2_HUMAN	COPB2	102 kDa	0.31	12	[]	0	0	0	0	8		0	8	#DIV/0!	82	12	2	96	#DIV/0!
1084	Serine/threonine-protein kinase mTOR OS=Homo sapiens GN=MTOR PE=1 SV=1	MTOR_HUMAN	MTOR	289 kDa	0.68	2	[]	0	0	0	0	8	0	0	8	#DIV/0!	16	0		16	#DIV/0!
1132	Protein disulfide-isomerase OS=Homo sapiens GN=P4HB PE=1 SV=3	PDIA1_HUMAN	PDIA1	57 kDa	0.7	0.6	[]	0	0	0	0	6	2		8	#DIV/0!	5			5	#DIV/0!
553	Phosphatidylcholine transfer protein OS=Homo sapiens GN=PCTP PE=1 SV=1	PPCT_HUMAN	PPCT	25 kDa	0.43	0.1	[]	0	0	0	0	8		0	8	#DIV/0!	1	0		1	#DIV/0!
1303	Replication factor C subunit 4 OS=Homo sapiens GN=RFC4 PE=1 SV=2	RFC4_HUMAN	RFC4	40 kDa	0.78	1.5	[]	0	0	0	0	7	1	0	8	#DIV/0!	12	0		12	#DIV/0!
1224	Ras-related GTP-binding protein B OS=Homo sapiens GN=RRAGB PE=1 SV=1	RRAGB_HUMAN	RRAGB	43 kDa	0.75	1.6	[]	0	0	0	0	7	1	0	8	#DIV/0!	13	0	0	13	#DIV/0!
493	Splicing factor 3B subunit 3 OS=Homo sapiens GN=SF3B3 PE=1 SV=4	SF3B3_HUMAN	SF3B3	136 kDa	0.42	3.4	[]	0	0	0	0	0	7	1	8	#DIV/0!	22	0	5	27	#DIV/0!
713	Tetratricopeptide repeat protein 28 OS=Homo sapiens GN=TTC28 PE=1 SV=4	TTC28_HUMAN	TTC28	271 kDa	0.5	0.4	[]	0	0	0	0	7	1	0	8	#DIV/0!	2	0	1	3	#DIV/0!
1390	Golgi SNAP receptor complex member 2 OS=Homo sapiens GN=GOSR2 PE=1 SV=2	GOSR2_HUMAN	GOSR2	25 kDa	0.84	1.4	[]	0	0		0	8			8	#DIV/0!		11		11	#DIV/0!
898	Hydroxyacyl-coenzyme A dehydrogenase, mitochondrial OS=Homo sapiens GN=HADH PE=1 SV=3	HCDH_HUMAN	HCDH	34 kDa	0.59	2.1	[]	0	0		0	1	7	0	8	#DIV/0!	15		2	17	#DIV/0!
537	Calpain-2 catalytic subunit OS=Homo sapiens GN=CAPN2 PE=1 SV=6	CAN2_HUMAN	CAN2	80 kDa	0.43	2.4	[]	0		0	0	1	4	3	8	#DIV/0!	14	0	5	19	#DIV/0!
1032	Phospholipid hydroperoxide glutathione peroxidase, mitochondrial OS=Homo sapiens GN=GPX4 PE=1 SV=3	GPX4_HUMAN	GPX4	22 kDa	0.66	2.1	[]	0		0	0	8		0	8	#DIV/0!	17			17	#DIV/0!
618	Nuclear pore complex protein Nup133 OS=Homo sapiens GN=NUP133 PE=1 SV=2	NU133_HUMAN	NU133	129 kDa	0.46	5.6	[]	0		0	0	5	1	2	8	#DIV/0!	45	0	0	45	#DIV/0!
1008	Rab3 GTPase-activating protein catalytic subunit OS=Homo sapiens GN=RAB3GAP1 PE=1 SV=3	RB3GP_HUMAN	RB3GP	111 kDa	0.64	1.6	[]	0		0	0	6	2	0	8	#DIV/0!	10	2	1	13	#DIV/0!
900	Cyclin-dependent kinase inhibitor 2A OS=Homo sapiens GN=CDKN2A PE=1 SV=2	CDN2A_HUMAN	CDN2A	17 kDa	0.59	2.6	[]	0			0	8			8	#DIV/0!	21			21	#DIV/0!
17	Protein diaphanous homolog 3 OS=Homo sapiens GN=DIAPH3 PE=1 SV=4	DIAP3_HUMAN	DIAP3	137 kDa	0.091	0	[]	0			0	5	2	1	8	#DIV/0!	0	0		0	#DIV/0!
76	Eukaryotic translation initiation factor 2A OS=Homo sapiens GN=EIF2A PE=1 SV=3	EIF2A_HUMAN	EIF2A	65 kDa	0.2	6.4	[]	0			0	7	1	0	8	#DIV/0!	33	16	2	51	#DIV/0!
1670	Probable glutathione peroxidase 8 OS=Homo sapiens GN=GPX8 PE=1 SV=2	GPX8_HUMAN	GPX8	24 kDa	1	1	[]	0			0	8	0		8	#DIV/0!	8			8	#DIV/0!
1345	Interleukin-1 receptor accessory protein OS=Homo sapiens GN=IL1RAP PE=1 SV=2	IL1AP_HUMAN	IL1AP	65 kDa	0.81	1.4	[]	0			0	8	0	0	8	#DIV/0!	2	9	0	11	#DIV/0!
764	26S protease regulatory subunit 6A OS=Homo sapiens GN=PSMC3 PE=1 SV=3	PRS6A_HUMAN	PRS6A	49 kDa	0.53	3.4	[]	0			0	5	0	3	8	#DIV/0!	27			27	#DIV/0!
850	Replication factor C subunit 2 OS=Homo sapiens GN=RFC2 PE=1 SV=3	RFC2_HUMAN	RFC2	39 kDa	0.57	2.8	[]	0			0	5	3	0	8	#DIV/0!	22	0	0	22	#DIV/0!
1016	WD repeat-containing protein 20 OS=Homo sapiens GN=WDR20 PE=1 SV=2	WDR20_HUMAN	WDR20	63 kDa	0.65	1.9	[]	0			0	3	5	0	8	#DIV/0!	1	14		15	#DIV/0!
276	Zinc finger RNA-binding protein OS=Homo sapiens GN=ZFR PE=1 SV=2	ZFR_HUMAN	ZFR	117 kDa	0.37	0	[]	0			0	0	8	0	8	#DIV/0!	0	0	0	0	#DIV/0!
549	Krev interaction trapped protein 1 OS=Homo sapiens GN=KRIT1 PE=1 SV=2	KRIT1_HUMAN	KRIT1	84 kDa	0.43	0.1	[]		0	0	0	8	0	0	8	#DIV/0!	0	1	0	1	#DIV/0!
858	Transcriptional activator protein Pur-alpha OS=Homo sapiens GN=PURA PE=1 SV=2	PURA_HUMAN	PURA	35 kDa	0.57	0.4	[]				0		8	0	8	#DIV/0!	1		2	3	#DIV/0!
894	RNA 3'-terminal phosphate cyclase-like protein OS=Homo sapiens GN=RCL1 PE=1 SV=3	RCL1_HUMAN	RCL1	41 kDa	0.59	2.5	[]				0	2	6	0	8	#DIV/0!	20			20	#DIV/0!
1662	28S ribosomal protein S9, mitochondrial OS=Homo sapiens GN=MRPS9 PE=1 SV=2	RT09_HUMAN	RT09	46 kDa	1	1	[]				0	3	4	1	8	#DIV/0!	8		0	8	#DIV/0!
1085	Solute carrier organic anion transporter family member 4A1 OS=Homo sapiens GN=SLCO4A1 PE=1 SV=2	SO4A1_HUMAN	SO4A1	77 kDa	0.68	0.5	[]				0	8			8	#DIV/0!	4			4	#DIV/0!
820	Twinfilin-1 OS=Homo sapiens GN=TWF1 PE=1 SV=3	TWF1_HUMAN	TWF1	40 kDa	0.55	1.6	[]				0	4	4		8	#DIV/0!	6	7		13	#DIV/0!
1281	Clustered mitochondria protein homolog OS=Homo sapiens GN=CLUH PE=1 SV=2	CLU_HUMAN	CLU	147 kDa	0.77	0.7	[]	0	0	0	0	0	8	1	9	#DIV/0!	6	0		6	#DIV/0!
1013	Eukaryotic translation initiation factor 2-alpha kinase 3 OS=Homo sapiens GN=EIF2AK3 PE=1 SV=3	E2AK3_HUMAN	E2AK3	125 kDa	0.65	1.9	[]	0	0	0	0	4	5	0	9	#DIV/0!	1	16	0	17	#DIV/0!
1665	Heme oxygenase 1 OS=Homo sapiens GN=HMOX1 PE=1 SV=1	HMOX1_HUMAN	HMOX1	33 kDa	1	1	[]	0	0	0	0	7	2		9	#DIV/0!	0	9	0	9	#DIV/0!
49	Mitochondrial Rho GTPase 2 OS=Homo sapiens GN=RHOT2 PE=1 SV=2	MIRO2_HUMAN	MIRO2	68 kDa	0.16	5.2	[]	0	0	0	0	4	2	3	9	#DIV/0!	30	7	10	47	#DIV/0!
539	Glycine--tRNA ligase OS=Homo sapiens GN=GARS PE=1 SV=3	SYG_HUMAN	SYG	83 kDa	0.43	4.7	[]	0	0	0	0	5	1	3	9	#DIV/0!	39	3	0	42	#DIV/0!
1099	Nuclear pore glycoprotein p62 OS=Homo sapiens GN=NUP62 PE=1 SV=3	NUP62_HUMAN	NUP62	53 kDa	0.68	1.8	[]	0	0		0	9			9	#DIV/0!	14		2	16	#DIV/0!
1550	Protein diaphanous homolog 2 OS=Homo sapiens GN=DIAPH2 PE=1 SV=1	DIAP2_HUMAN	DIAP2	126 kDa	0.93	0.9	[]	0		0	0	9	0	0	9	#DIV/0!	7	0	1	8	#DIV/0!
58	Sex comb on midleg-like protein 2 OS=Homo sapiens GN=SCML2 PE=1 SV=1	SCML2_HUMAN	SCML2	77 kDa	0.16	3.8	[]	0		0	0	2	7	0	9	#DIV/0!	18	13	3	34	#DIV/0!
1295	GTPase Era, mitochondrial OS=Homo sapiens GN=ERAL1 PE=1 SV=2	ERAL1_HUMAN	ERAL1	48 kDa	0.78	1.4	[]	0			0	4	1	4	9	#DIV/0!	13		0	13	#DIV/0!
427	FAST kinase domain-containing protein 5 OS=Homo sapiens GN=FASTKD5 PE=1 SV=1	FAKD5_HUMAN	FAKD5	87 kDa	0.4	2.2	[]	0			0	7	1	1	9	#DIV/0!	10	10	0	20	#DIV/0!
211	Importin-4 OS=Homo sapiens GN=IPO4 PE=1 SV=2	IPO4_HUMAN	IPO4	119 kDa	0.34	12	[]	0			0	8		1	9	#DIV/0!	93	0	12	105	#DIV/0!
680	Protein kinase C iota type OS=Homo sapiens GN=PRKCI PE=1 SV=2	KPCI_HUMAN	KPCI	68 kDa	0.49	0.2	[]	0			0	9		0	9	#DIV/0!	2			2	#DIV/0!
682	Myeloid leukemia factor 2 OS=Homo sapiens GN=MLF2 PE=1 SV=1	MLF2_HUMAN	MLF2	28 kDa	0.49	0.2	[]	0			0	9			9	#DIV/0!	2			2	#DIV/0!
1443	Reticulon-3 OS=Homo sapiens GN=RTN3 PE=1 SV=2	RTN3_HUMAN	RTN3	113 kDa	0.87	0.8	[]	0			0	9			9	#DIV/0!	7			7	#DIV/0!
1183	Vacuolar protein sorting-associated protein 33B OS=Homo sapiens GN=VPS33B PE=1 SV=2	VP33B_HUMAN	VP33B	71 kDa	0.72	0.7	[]	0			0	6	3	0	9	#DIV/0!	6		0	6	#DIV/0!
1453	AP-1 complex subunit beta-1 OS=Homo sapiens GN=AP1B1 PE=1 SV=2	AP1B1_HUMAN	AP1B1	105 kDa	0.87	1.2	[]		0		0	5	4	0	9	#DIV/0!	11		0	11	#DIV/0!
1229	Eukaryotic translation initiation factor 3 subunit L OS=Homo sapiens GN=EIF3L PE=1 SV=1	EIF3L_HUMAN	EIF3L	67 kDa	0.75	0.7	[]		0		0	0	8	1	9	#DIV/0!	1		5	6	#DIV/0!
241	Trans-Golgi network integral membrane protein 2 OS=Homo sapiens GN=TGOLN2 PE=1 SV=2	TGON2_HUMAN	TGON2	51 kDa	0.35	0.1	[]		0		0	1	8	0	9	#DIV/0!	0	1		1	#DIV/0!
1416	5'-AMP-activated protein kinase subunit beta-1 OS=Homo sapiens GN=PRKAB1 PE=1 SV=4	AAKB1_HUMAN	AAKB1	30 kDa	0.85	1.3	[]				0	9	0	0	9	#DIV/0!	12			12	#DIV/0!
831	Chromobox protein homolog 3 OS=Homo sapiens GN=CBX3 PE=1 SV=4	CBX3_HUMAN	CBX3	21 kDa	0.56	2.6	[]				0	9			9	#DIV/0!	21		2	23	#DIV/0!
118	Copine-1 OS=Homo sapiens GN=CPNE1 PE=1 SV=1	CPNE1_HUMAN	CPNE1	59 kDa	0.27	3.9	[]				0	7	2	0	9	#DIV/0!	22		13	35	#DIV/0!
1087	Mitochondrial carrier homolog 2 OS=Homo sapiens GN=MTCH2 PE=1 SV=1	MTCH2_HUMAN	MTCH2	33 kDa	0.68	2	[]				0	9	0	0	9	#DIV/0!	18		0	18	#DIV/0!
681	Transmembrane protein 230 OS=Homo sapiens GN=TMEM230 PE=1 SV=1	TM230_HUMAN	TM230	13 kDa	0.49	0.2	[]				0	9			9	#DIV/0!	2			2	#DIV/0!
243	Bone morphogenetic protein receptor type-2 OS=Homo sapiens GN=BMPR2 PE=1 SV=2	BMPR2_HUMAN	BMPR2	115 kDa	0.35	0.1	[]	0	0	0	0	9		1	10	#DIV/0!	1	0	0	1	#DIV/0!
686	CCR4-NOT transcription complex subunit 1 OS=Homo sapiens GN=CNOT1 PE=1 SV=2	CNOT1_HUMAN	CNOT1	267 kDa	0.49	3.9	[]	0	0	0	0	9	1		10	#DIV/0!	38	0	1	39	#DIV/0!
384	Probable ATP-dependent RNA helicase DDX20 OS=Homo sapiens GN=DDX20 PE=1 SV=2	DDX20_HUMAN	DDX20	92 kDa	0.38	10	[]	0	0	0	0	10	0	0	10	#DIV/0!	94		6	100	#DIV/0!
939	Transitional endoplasmic reticulum ATPase OS=Homo sapiens GN=VCP PE=1 SV=4	TERA_HUMAN	TERA	89 kDa	0.61	2.3	[]	0	0	0	0	4	6	0	10	#DIV/0!	23	0	0	23	#DIV/0!
1568	V-type proton ATPase subunit C 1 OS=Homo sapiens GN=ATP6V1C1 PE=1 SV=4	VATC1_HUMAN	VATC1	44 kDa	0.94	0.9	[]	0	0	0	0	0	10	0	10	#DIV/0!	9	0	0	9	#DIV/0!
832	Immunoglobulin-binding protein 1 OS=Homo sapiens GN=IGBP1 PE=1 SV=1	IGBP1_HUMAN	IGBP1	39 kDa	0.56	0.4	[]	0	0		0	9	1	0	10	#DIV/0!	4	0		4	#DIV/0!
930	MOB kinase activator 3A OS=Homo sapiens GN=MOB3A PE=1 SV=1	MOB3A_HUMAN	MOB3A	25 kDa	0.61	0.4	[]	0	0		0	10			10	#DIV/0!	0	4		4	#DIV/0!
1089	Nucleolar GTP-binding protein 1 OS=Homo sapiens GN=GTPBP4 PE=1 SV=3	NOG1_HUMAN	NOG1	74 kDa	0.68	0.5	[]	0	0		0		10	0	10	#DIV/0!	5	0		5	#DIV/0!
1548	Peroxisomal multifunctional enzyme type 2 OS=Homo sapiens GN=HSD17B4 PE=1 SV=3	DHB4_HUMAN	DHB4	80 kDa	0.93	1.1	[]	0		0	0	0	9	1	10	#DIV/0!	3		8	11	#DIV/0!
367	Glucose-fructose oxidoreductase domain-containing protein 1 OS=Homo sapiens GN=GFOD1 PE=1 SV=1	GFOD1_HUMAN	GFOD1	43 kDa	0.37	0	[]	0		0	0	10			10	#DIV/0!				0	#DIV/0!
1373	Casein kinase I isoform alpha OS=Homo sapiens GN=CSNK1A1 PE=1 SV=2	KC1A_HUMAN	KC1A	39 kDa	0.83	1.4	[]	0		0	0	10		0	10	#DIV/0!	14		0	14	#DIV/0!
693	Leucine-rich repeat-containing protein 40 OS=Homo sapiens GN=LRRC40 PE=1 SV=1	LRC40_HUMAN	LRC40	68 kDa	0.5	2.9	[]	0		0	0	0	3	7	10	#DIV/0!	26		3	29	#DIV/0!
572	Dual specificity mitogen-activated protein kinase kinase 1 OS=Homo sapiens GN=MAP2K1 PE=1 SV=2	MP2K1_HUMAN	MP2K1	43 kDa	0.44	3.6	[]	0		0	0	1	5	4	10	#DIV/0!	32		4	36	#DIV/0!
509	Ankyrin repeat and SAM domain-containing protein 6 OS=Homo sapiens GN=ANKS6 PE=1 SV=2	ANKS6_HUMAN	ANKS6	92 kDa	0.42	0.1	[]	0			0	10	0	0	10	#DIV/0!	1	0		1	#DIV/0!
1250	Protein ELYS OS=Homo sapiens GN=AHCTF1 PE=1 SV=3	ELYS_HUMAN	ELYS	253 kDa	0.76	1.4	[]	0			0	8	2	0	10	#DIV/0!	11	3	0	14	#DIV/0!
373	PCNA-associated factor OS=Homo sapiens GN=KIAA0101 PE=1 SV=1	PAF15_HUMAN	PAF15	12 kDa	0.37	0	[]	0			0	10		0	10	#DIV/0!				0	#DIV/0!
924	Protein phosphatase 1G OS=Homo sapiens GN=PPM1G PE=1 SV=1	PPM1G_HUMAN	PPM1G	59 kDa	0.61	2.4	[]	0			0	1	8	1	10	#DIV/0!	24		0	24	#DIV/0!
1402	Replication factor C subunit 3 OS=Homo sapiens GN=RFC3 PE=1 SV=2	RFC3_HUMAN	RFC3	41 kDa	0.84	1.3	[]	0			0	7	3		10	#DIV/0!	13			13	#DIV/0!
926	Superkiller viralicidic activity 2-like 2 OS=Homo sapiens GN=SKIV2L2 PE=1 SV=3	SK2L2_HUMAN	SK2L2	118 kDa	0.61	0.5	[]	0			0	1	9	0	10	#DIV/0!	3		2	5	#DIV/0!
1502	Thioredoxin-related transmembrane protein 2 OS=Homo sapiens GN=TMX2 PE=1 SV=1	TMX2_HUMAN	TMX2	34 kDa	0.9	1.2	[]	0			0	10			10	#DIV/0!	12	0	0	12	#DIV/0!
1227	Protein disulfide-isomerase TMX3 OS=Homo sapiens GN=TMX3 PE=1 SV=2	TMX3_HUMAN	TMX3	52 kDa	0.75	1.5	[]	0			0	7	2	1	10	#DIV/0!	1	14	0	15	#DIV/0!
397	PIH1 domain-containing protein 1 OS=Homo sapiens GN=PIH1D1 PE=1 SV=1	PIHD1_HUMAN	PIHD1	32 kDa	0.39	1.9	[]		0	0	0	3	7		10	#DIV/0!	10	2	7	19	#DIV/0!
372	Tumor necrosis factor receptor superfamily member 3 OS=Homo sapiens GN=LTBR PE=1 SV=1	TNR3_HUMAN	TNR3	47 kDa	0.37	0	[]		0	0	0	10			10	#DIV/0!	0			0	#DIV/0!
796	Tetratricopeptide repeat protein 1 OS=Homo sapiens GN=TTC1 PE=1 SV=1	TTC1_HUMAN	TTC1	34 kDa	0.54	1.7	[]		0		0	7	3		10	#DIV/0!	8	9		17	#DIV/0!
1047	General vesicular transport factor p115 OS=Homo sapiens GN=USO1 PE=1 SV=2	USO1_HUMAN	USO1	108 kDa	0.66	2.1	[]		0		0	10		0	10	#DIV/0!	21	0		21	#DIV/0!
651	Dihydrofolate reductase OS=Homo sapiens GN=DHFR PE=1 SV=2	DYR_HUMAN	DYR	21 kDa	0.48	2.4	[]				0	7	2	1	10	#DIV/0!	19	0	5	24	#DIV/0!
546	Phosphomevalonate kinase OS=Homo sapiens GN=PMVK PE=1 SV=3	PMVK_HUMAN	PMVK	22 kDa	0.43	6.2	[]				0	10	0		10	#DIV/0!	60		2	62	#DIV/0!
322	Ras-related protein Rab-34 OS=Homo sapiens GN=RAB34 PE=1 SV=1	RAB34_HUMAN	RAB34	29 kDa	0.37	0	[]				0	10	0		10	#DIV/0!			0	0	#DIV/0!
798	Translocon-associated protein subunit delta OS=Homo sapiens GN=SSR4 PE=1 SV=1	SSRD_HUMAN	SSRD	19 kDa	0.54	3.3	[]				0	10			10	#DIV/0!	33			33	#DIV/0!
1284	Tyrosine-protein kinase CSK OS=Homo sapiens GN=CSK PE=1 SV=1	CSK_HUMAN	CSK	51 kDa	0.77	1.5	[]	0	0	0	0	8	3	0	11	#DIV/0!	15		1	16	#DIV/0!
1143	Interleukin enhancer-binding factor 3 OS=Homo sapiens GN=ILF3 PE=1 SV=3	ILF3_HUMAN	ILF3	95 kDa	0.71	0.6	[]	0	0	0	0	2	9	0	11	#DIV/0!	6	0	1	7	#DIV/0!
404	DNA-directed RNA polymerase II subunit RPB2 OS=Homo sapiens GN=POLR2B PE=1 SV=1	RPB2_HUMAN	RPB2	134 kDa	0.39	7.1	[]	0	0	0	0	0	3	8	11	#DIV/0!	72	0	6	78	#DIV/0!
1664	tRNA pseudouridine synthase A, mitochondrial OS=Homo sapiens GN=PUS1 PE=1 SV=3	TRUA_HUMAN	TRUA	47 kDa	1	1	[]	0	0	0	0	10	1	0	11	#DIV/0!	11	0	0	11	#DIV/0!
1325	Tight junction protein ZO-2 OS=Homo sapiens GN=TJP2 PE=1 SV=2	ZO2_HUMAN	ZO2	134 kDa	0.79	1.5	[]	0	0	0	0	9	2	0	11	#DIV/0!	16	0	0	16	#DIV/0!
785	Actin-related protein 2 OS=Homo sapiens GN=ACTR2 PE=1 SV=1	ARP2_HUMAN	ARP2	45 kDa	0.54	3	[]	0	0		0	9	2	0	11	#DIV/0!	32	0	1	33	#DIV/0!
1139	N-alpha-acetyltransferase 15, NatA auxiliary subunit OS=Homo sapiens GN=NAA15 PE=1 SV=1	NAA15_HUMAN	NAA15	101 kDa	0.71	1.8	[]	0	0		0	1	10	0	11	#DIV/0!	20	0	0	20	#DIV/0!
1161	Peptidyl-prolyl cis-trans isomerase NIMA-interacting 1 OS=Homo sapiens GN=PIN1 PE=1 SV=1	PIN1_HUMAN	PIN1	18 kDa	0.71	1.8	[]	0	0		0	11			11	#DIV/0!	20	0		20	#DIV/0!
1245	Peptidyl-tRNA hydrolase 2, mitochondrial OS=Homo sapiens GN=PTRH2 PE=1 SV=1	PTH2_HUMAN	PTH2	19 kDa	0.76	1.6	[]	0	0		0	11			11	#DIV/0!	18			18	#DIV/0!
608	Uridine 5'-monophosphate synthase OS=Homo sapiens GN=UMPS PE=1 SV=1	UMPS_HUMAN	UMPS	52 kDa	0.45	4.7	[]	0	0		0	8		3	11	#DIV/0!	50		2	52	#DIV/0!
562	Coronin-7 OS=Homo sapiens GN=CORO7 PE=1 SV=2	CORO7_HUMAN	CORO7	101 kDa	0.44	4.1	[]	0		0	0	5	6	0	11	#DIV/0!	41		4	45	#DIV/0!
110	Four and a half LIM domains protein 1 OS=Homo sapiens GN=FHL1 PE=1 SV=4	FHL1_HUMAN	FHL1	36 kDa	0.25	2.3	[]	0		0	0	6	5	0	11	#DIV/0!	14	7	4	25	#DIV/0!
1244	Oxysterol-binding protein-related protein 3 OS=Homo sapiens GN=OSBPL3 PE=1 SV=1	OSBL3_HUMAN	OSBL3	101 kDa	0.76	1.6	[]	0		0	0	11	0	0	11	#DIV/0!	18	0	0	18	#DIV/0!
1186	6-phosphogluconate dehydrogenase, decarboxylating OS=Homo sapiens GN=PGD PE=1 SV=3	6PGD_HUMAN	6PGD	53 kDa	0.73	1.7	[]	0			0	0	10	1	11	#DIV/0!	19			19	#DIV/0!
1422	Leucine-rich repeat transmembrane protein FLRT3 OS=Homo sapiens GN=FLRT3 PE=1 SV=1	FLRT3_HUMAN	FLRT3	73 kDa	0.86	0.8	[]	0			0	3	8	0	11	#DIV/0!	0	8	1	9	#DIV/0!
236	Proteasome subunit alpha type-1 OS=Homo sapiens GN=PSMA1 PE=1 SV=1	PSA1_HUMAN	PSA1	30 kDa	0.35	8.5	[]	0			0	10	1	0	11	#DIV/0!	83	0	11	94	#DIV/0!
538	Interferon-induced, double-stranded RNA-activated protein kinase OS=Homo sapiens GN=EIF2AK2 PE=1 SV=2	E2AK2_HUMAN	E2AK2	62 kDa	0.43	5.3	[]			0	0	1	4	6	11	#DIV/0!	55	0	3	58	#DIV/0!
964	Heat shock protein beta-8 OS=Homo sapiens GN=HSPB8 PE=1 SV=1	HSPB8_HUMAN	HSPB8	22 kDa	0.62	2.4	[]			0	0	11	0		11	#DIV/0!	26			26	#DIV/0!
1009	Sodium-dependent multivitamin transporter OS=Homo sapiens GN=SLC5A6 PE=2 SV=2	SC5A6_HUMAN	SC5A6	69 kDa	0.65	0.5	[]			0	0	11	0		11	#DIV/0!	5		0	5	#DIV/0!
791	Ubiquitin carboxyl-terminal hydrolase 10 OS=Homo sapiens GN=USP10 PE=1 SV=2	UBP10_HUMAN	UBP10	87 kDa	0.54	1.8	[]			0	0	0	6	5	11	#DIV/0!	14		6	20	#DIV/0!
487	Perilipin-3 OS=Homo sapiens GN=PLIN3 PE=1 SV=3	PLIN3_HUMAN	PLIN3	47 kDa	0.42	0.09	[]				0	11	0	0	11	#DIV/0!	1			1	#DIV/0!
282	Protein tyrosine phosphatase type IVA 1 OS=Homo sapiens GN=PTP4A1 PE=1 SV=2	TP4A1_HUMAN	TP4A1	20 kDa	0.37	0	[]				0	11	0		11	#DIV/0!	0		0	0	#DIV/0!
1541	DBIRD complex subunit ZNF326 OS=Homo sapiens GN=ZNF326 PE=1 SV=2	ZN326_HUMAN	ZN326	66 kDa	0.93	0.9	[]	0	0	0	0	0	8	4	12	#DIV/0!	9		2	11	#DIV/0!
765	ATP-dependent 6-phosphofructokinase, liver type OS=Homo sapiens GN=PFKL PE=1 SV=6	PFKAL_HUMAN	PFKAL	85 kDa	0.53	3.6	[]	0	0		0			12	12	#DIV/0!	44	0		44	#DIV/0!
1659	SUMO-activating enzyme subunit 1 OS=Homo sapiens GN=SAE1 PE=1 SV=1	SAE1_HUMAN	SAE1	38 kDa	1	1	[]	0	0		0	0	10	2	12	#DIV/0!	10		2	12	#DIV/0!
835	Kinesin-like protein KIF23 OS=Homo sapiens GN=KIF23 PE=1 SV=3	KIF23_HUMAN	KIF23	110 kDa	0.56	2.2	[]	0		0	0	4	8	0	12	#DIV/0!	24		3	27	#DIV/0!
942	Succinyl-CoA ligase [GDP-forming] subunit beta, mitochondrial OS=Homo sapiens GN=SUCLG2 PE=1 SV=2	SUCB2_HUMAN	SUCB2	47 kDa	0.61	2.3	[]	0		0	0	3	0	9	12	#DIV/0!	28	0	0	28	#DIV/0!
985	Mitochondrial import receptor subunit TOM34 OS=Homo sapiens GN=TOMM34 PE=1 SV=2	TOM34_HUMAN	TOM34	35 kDa	0.64	2.2	[]	0		0	0	12		0	12	#DIV/0!	25	1		26	#DIV/0!
474	Dedicator of cytokinesis protein 9 OS=Homo sapiens GN=DOCK9 PE=1 SV=2	DOCK9_HUMAN	DOCK9	236 kDa	0.41	0.08	[]	0			0	12	0	0	12	#DIV/0!	1	0		1	#DIV/0!
1088	Eukaryotic translation initiation factor 1A, Y-chromosomal OS=Homo sapiens GN=EIF1AY PE=1 SV=4	IF1AY_HUMAN	IF1AY	16 kDa	0.68	2	[]	0			0	12	0		12	#DIV/0!	24			24	#DIV/0!
1332	Importin-5 OS=Homo sapiens GN=IPO5 PE=1 SV=4	IPO5_HUMAN	IPO5	124 kDa	0.8	1.4	[]	0			0	8	1	3	12	#DIV/0!	17		0	17	#DIV/0!
94	Nucleolin OS=Homo sapiens GN=NCL PE=1 SV=3	NUCL_HUMAN	NUCL	77 kDa	0.23	8.3	[]	0			0	12			12	#DIV/0!	70	30		100	#DIV/0!
1029	Sulfotransferase 1A2 OS=Homo sapiens GN=SULT1A2 PE=1 SV=2	ST1A2_HUMAN	ST1A2	34 kDa	0.65	1.8	[]	0			0	5	6	1	12	#DIV/0!	19		2	21	#DIV/0!
371	Type 1 phosphatidylinositol 4,5-bisphosphate 4-phosphatase OS=Homo sapiens GN=TMEM55B PE=1 SV=1	TM55B_HUMAN	TM55B	29 kDa	0.37	0	[]	0			0	12			12	#DIV/0!	0			0	#DIV/0!
368	Tumor necrosis factor receptor superfamily member 21 OS=Homo sapiens GN=TNFRSF21 PE=1 SV=1	TNR21_HUMAN	TNR21	72 kDa	0.37	0	[]	0			0	12	0		12	#DIV/0!	0			0	#DIV/0!
621	Nuclear pore complex protein Nup107 OS=Homo sapiens GN=NUP107 PE=1 SV=1	NU107_HUMAN	NU107	106 kDa	0.46	3.4	[]		0		0	6	1	5	12	#DIV/0!	37	0	4	41	#DIV/0!
1052	Eukaryotic translation initiation factor 3 subunit K OS=Homo sapiens GN=EIF3K PE=1 SV=1	EIF3K_HUMAN	EIF3K	25 kDa	0.66	2.1	[]			0	0	12	0		12	#DIV/0!	25	0	0	25	#DIV/0!
928	Flavin reductase (NADPH) OS=Homo sapiens GN=BLVRB PE=1 SV=3	BLVRB_HUMAN	BLVRB	22 kDa	0.61	2.5	[]				0	12		0	12	#DIV/0!	30			30	#DIV/0!
1487	Ceramide synthase 6 OS=Homo sapiens GN=CERS6 PE=1 SV=1	CERS6_HUMAN	CERS6	45 kDa	0.9	1.2	[]				0	12			12	#DIV/0!	9	5		14	#DIV/0!
1415	Cytochrome b5 type B OS=Homo sapiens GN=CYB5B PE=1 SV=2	CYB5B_HUMAN	CYB5B	16 kDa	0.85	1.3	[]				0	12	0	0	12	#DIV/0!	16			16	#DIV/0!
1417	Protein lin-7 homolog C OS=Homo sapiens GN=LIN7C PE=1 SV=1	LIN7C_HUMAN	LIN7C	22 kDa	0.85	0.8	[]				0	12			12	#DIV/0!	9	0		9	#DIV/0!
961	Nucleosome assembly protein 1-like 4 OS=Homo sapiens GN=NAP1L4 PE=1 SV=1	NP1L4_HUMAN	NP1L4	43 kDa	0.62	1.7	[]				0	11	1		12	#DIV/0!	12	8	0	20	#DIV/0!
72	Palmitoyltransferase ZDHHC13 OS=Homo sapiens GN=ZDHHC13 PE=1 SV=3	ZDH13_HUMAN	ZDH13	71 kDa	0.19	0.08	[]				0	8	4	0	12	#DIV/0!		1	0	1	#DIV/0!
475	Zinc transporter 7 OS=Homo sapiens GN=SLC30A7 PE=2 SV=1	ZNT7_HUMAN	ZNT7	42 kDa	0.41	0.08	[]				0	12	0		12	#DIV/0!	1	0		1	#DIV/0!
1596	BAG family molecular chaperone regulator 2 OS=Homo sapiens GN=BAG2 PE=1 SV=1	BAG2_HUMAN	BAG2	24 kDa	0.96	1.1	[]	0	0	0	0	13	0	0	13	#DIV/0!	14	0	0	14	#DIV/0!
1274	Brefeldin A-inhibited guanine nucleotide-exchange protein 1 OS=Homo sapiens GN=ARFGEF1 PE=1 SV=2	BIG1_HUMAN	BIG1	209 kDa	0.77	0.7	[]	0	0	0	0	10	3	0	13	#DIV/0!	9	0	0	9	#DIV/0!
1597	FYVE and coiled-coil domain-containing protein 1 OS=Homo sapiens GN=FYCO1 PE=1 SV=3	FYCO1_HUMAN	FYCO1	167 kDa	0.96	1.1	[]	0	0	0	0	13	0	0	13	#DIV/0!	14	0	0	14	#DIV/0!
745	Vesicle-fusing ATPase OS=Homo sapiens GN=NSF PE=1 SV=3	NSF_HUMAN	NSF	83 kDa	0.52	3.7	[]	0	0	0	0	11	0	2	13	#DIV/0!	48	0	0	48	#DIV/0!
1495	Ribosomal L1 domain-containing protein 1 OS=Homo sapiens GN=RSL1D1 PE=1 SV=3	RL1D1_HUMAN	RL1D1	55 kDa	0.9	0.8	[]	0	0	0	0	1	12	0	13	#DIV/0!	10	1	0	11	#DIV/0!
1026	Hydroxymethylglutaryl-CoA synthase, cytoplasmic OS=Homo sapiens GN=HMGCS1 PE=1 SV=2	HMCS1_HUMAN	HMCS1	57 kDa	0.65	1.9	[]	0	0		0	0	9	4	13	#DIV/0!	24		1	25	#DIV/0!
281	Protein TANC1 OS=Homo sapiens GN=TANC1 PE=1 SV=3	TANC1_HUMAN	TANC1	202 kDa	0.37	0	[]	0	0		0	13		0	13	#DIV/0!	0	0	0	0	#DIV/0!
1484	Actin-related protein 2/3 complex subunit 2 OS=Homo sapiens GN=ARPC2 PE=1 SV=1	ARPC2_HUMAN	ARPC2	34 kDa	0.89	0.8	[]	0			0	0	13	0	13	#DIV/0!	6		5	11	#DIV/0!
1587	ATP-dependent RNA helicase DDX18 OS=Homo sapiens GN=DDX18 PE=1 SV=2	DDX18_HUMAN	DDX18	75 kDa	0.96	1.1	[]	0			0	0	11	2	13	#DIV/0!	14		0	14	#DIV/0!
624	V-type proton ATPase catalytic subunit A OS=Homo sapiens GN=ATP6V1A PE=1 SV=2	VATA_HUMAN	VATA	68 kDa	0.46	3.4	[]	0			0	0	11	2	13	#DIV/0!	39	0	5	44	#DIV/0!
316	Partner of Y14 and mago OS=Homo sapiens GN=WIBG PE=1 SV=1	WIBG_HUMAN	WIBG	23 kDa	0.37	0	[]	0			0	13			13	#DIV/0!	0			0	#DIV/0!
438	Proteasome subunit alpha type-4 OS=Homo sapiens GN=PSMA4 PE=1 SV=1	PSA4_HUMAN	PSA4	29 kDa	0.4	4	[]		0		0	10	1	2	13	#DIV/0!	44		8	52	#DIV/0!
496	X-ray repair cross-complementing protein 6 OS=Homo sapiens GN=XRCC6 PE=1 SV=2	XRCC6_HUMAN	XRCC6	70 kDa	0.42	7.3	[]		0		0	3	10	0	13	#DIV/0!	92	0	3	95	#DIV/0!
1144	Active regulator of SIRT1 OS=Homo sapiens GN=RPS19BP1 PE=1 SV=1	AROS_HUMAN	AROS	15 kDa	0.71	1.8	[]				0	13		0	13	#DIV/0!	24			24	#DIV/0!
1509	Cytosolic Fe-S cluster assembly factor NUBP2 OS=Homo sapiens GN=NUBP2 PE=1 SV=1	NUBP2_HUMAN	NUBP2	29 kDa	0.91	1.2	[]				0	8	4	1	13	#DIV/0!	15		0	15	#DIV/0!
1479	Vesicle-associated membrane protein 8 OS=Homo sapiens GN=VAMP8 PE=1 SV=1	VAMP8_HUMAN	VAMP8	11 kDa	0.89	1.2	[]				0	13			13	#DIV/0!	16			16	#DIV/0!
675	AH receptor-interacting protein OS=Homo sapiens GN=AIP PE=1 SV=2	AIP_HUMAN	AIP	38 kDa	0.49	3.4	[]	0	0	0	0	14	0		14	#DIV/0!	43	0	4	47	#DIV/0!
150	LisH domain and HEAT repeat-containing protein KIAA1468 OS=Homo sapiens GN=KIAA1468 PE=1 SV=2	K1468_HUMAN	K1468	135 kDa	0.3	0.1	[]	0	0	0	0	11	3	0	14	#DIV/0!	2	0	0	2	#DIV/0!
511	Neurobeachin-like protein 1 OS=Homo sapiens GN=NBEAL1 PE=2 SV=3	NBEL1_HUMAN	NBEL1	307 kDa	0.42	0.3	[]	0	0	0	0	12	2	0	14	#DIV/0!	1	2	1	4	#DIV/0!
750	Vinculin OS=Homo sapiens GN=VCL PE=1 SV=4	VINC_HUMAN	VINC	124 kDa	0.52	1.6	[]	0	0	0	0	5	8	1	14	#DIV/0!	13	7	2	22	#DIV/0!
366	Bone morphogenetic protein receptor type-1A OS=Homo sapiens GN=BMPR1A PE=1 SV=2	BMR1A_HUMAN	BMR1A	60 kDa	0.37	0	[]	0	0		0	14			14	#DIV/0!	0			0	#DIV/0!
222	Fragile X mental retardation syndrome-related protein 2 OS=Homo sapiens GN=FXR2 PE=1 SV=2	FXR2_HUMAN	FXR2	74 kDa	0.34	INF	[]	0	0		0	14			14	#DIV/0!	65	3	16	84	#DIV/0!
1601	Polypyrimidine tract-binding protein 3 OS=Homo sapiens GN=PTBP3 PE=1 SV=2	PTBP3_HUMAN	PTBP3	60 kDa	0.96	1.1	[]	0		0	0	14			14	#DIV/0!	15			15	#DIV/0!
797	Twinfilin-2 OS=Homo sapiens GN=TWF2 PE=1 SV=2	TWF2_HUMAN	TWF2	40 kDa	0.54	0.4	[]	0		0	0	13	1		14	#DIV/0!	5			5	#DIV/0!
1086	ADP-ribosylation factor-like protein 2 OS=Homo sapiens GN=ARL2 PE=1 SV=4	ARL2_HUMAN	ARL2	21 kDa	0.68	2	[]	0			0	14	0	0	14	#DIV/0!	28	0	0	28	#DIV/0!
446	Cell division cycle protein 27 homolog OS=Homo sapiens GN=CDC27 PE=1 SV=2	CDC27_HUMAN	CDC27	92 kDa	0.4	0.4	[]	0			0	9	5		14	#DIV/0!	2	4	0	6	#DIV/0!
974	Spliceosome-associated protein CWC15 homolog OS=Homo sapiens GN=CWC15 PE=1 SV=2	CWC15_HUMAN	CWC15	27 kDa	0.63	0.6	[]	0			0	6	8	0	14	#DIV/0!	7	2	0	9	#DIV/0!
1222	DDB1- and CUL4-associated factor 7 OS=Homo sapiens GN=DCAF7 PE=1 SV=1	DCAF7_HUMAN	DCAF7	39 kDa	0.75	1.6	[]	0			0	13	1	0	14	#DIV/0!	23		0	23	#DIV/0!
1524	Kinesin-like protein KIF11 OS=Homo sapiens GN=KIF11 PE=1 SV=2	KIF11_HUMAN	KIF11	119 kDa	0.92	1.1	[]	0			0	0	5	9	14	#DIV/0!	6	2	7	15	#DIV/0!
673	Myotubularin-related protein 1 OS=Homo sapiens GN=MTMR1 PE=1 SV=4	MTMR1_HUMAN	MTMR1	75 kDa	0.49	0.3	[]	0			0	13	1	0	14	#DIV/0!	4	0		4	#DIV/0!
1119	Tumor protein p53-inducible protein 11 OS=Homo sapiens GN=TP53I11 PE=1 SV=2	P5I11_HUMAN	P5I11	21 kDa	0.69	1.5	[]	0			0	13	1		14	#DIV/0!	9	12		21	#DIV/0!
1005	Dual specificity mitogen-activated protein kinase kinase 3 OS=Homo sapiens GN=MAP2K3 PE=1 SV=2	MP2K3_HUMAN	MP2K3	39 kDa	0.64	2.1	[]		0	0	0	9	5	0	14	#DIV/0!	29	0	0	29	#DIV/0!
895	PRA1 family protein 3 OS=Homo sapiens GN=ARL6IP5 PE=1 SV=1	PRAF3_HUMAN	PRAF3	22 kDa	0.59	2.3	[]				0	2	12		14	#DIV/0!	1	30	1	32	#DIV/0!
369	Cystine/glutamate transporter OS=Homo sapiens GN=SLC7A11 PE=1 SV=1	XCT_HUMAN	XCT	55 kDa	0.37	0	[]				0	14		0	14	#DIV/0!	0			0	#DIV/0!
777	Proteasome-associated protein ECM29 homolog OS=Homo sapiens GN=ECM29 PE=1 SV=2	ECM29_HUMAN	ECM29	204 kDa	0.53	3.4	[]	0	0	0	0	14	0	1	15	#DIV/0!	51	0	0	51	#DIV/0!
752	Heterogeneous nuclear ribonucleoproteins C1/C2 OS=Homo sapiens GN=HNRNPC PE=1 SV=4	HNRPC_HUMAN	HNRPC	34 kDa	0.52	3.5	[]	0	0	0	0	10	5	0	15	#DIV/0!	52	0	0	52	#DIV/0!
933	Microtubule-associated protein 1B OS=Homo sapiens GN=MAP1B PE=1 SV=2	MAP1B_HUMAN	MAP1B	271 kDa	0.61	2.3	[]	0	0	0	0	10	5	0	15	#DIV/0!	35		0	35	#DIV/0!
421	Myb-binding protein 1A OS=Homo sapiens GN=MYBBP1A PE=1 SV=2	MBB1A_HUMAN	MBB1A	149 kDa	0.4	9	[]	0	0	0	0	3	12	0	15	#DIV/0!	129	2	4	135	#DIV/0!
1133	Nuclear pore complex protein Nup205 OS=Homo sapiens GN=NUP205 PE=1 SV=3	NU205_HUMAN	NU205	228 kDa	0.7	1.7	[]	0	0	0	0	4	9	2	15	#DIV/0!	24	0	1	25	#DIV/0!
969	Peptidyl-prolyl cis-trans isomerase B OS=Homo sapiens GN=PPIB PE=1 SV=2	PPIB_HUMAN	PPIB	24 kDa	0.63	2.3	[]	0	0	0	0	15		0	15	#DIV/0!	35		0	35	#DIV/0!
1546	Sec1 family domain-containing protein 1 OS=Homo sapiens GN=SCFD1 PE=1 SV=4	SCFD1_HUMAN	SCFD1	72 kDa	0.93	1.1	[]	0	0	0	0	14	1		15	#DIV/0!	17	0	0	17	#DIV/0!
1276	Vacuolar protein sorting-associated protein 4A OS=Homo sapiens GN=VPS4A PE=1 SV=1	VPS4A_HUMAN	VPS4A	49 kDa	0.77	0.7	[]	0	0	0	0	14	0	1	15	#DIV/0!	9	1	0	10	#DIV/0!
48	Apoptosis-stimulating of p53 protein 2 OS=Homo sapiens GN=TP53BP2 PE=1 SV=2	ASPP2_HUMAN	ASPP2	126 kDa	0.16	0.07	[]	0	0		0	6	9	0	15	#DIV/0!	1	0	0	1	#DIV/0!
652	Catenin alpha-1 OS=Homo sapiens GN=CTNNA1 PE=1 SV=1	CTNA1_HUMAN	CTNA1	100 kDa	0.48	0.3	[]	0	0		0	14	1	0	15	#DIV/0!	4	0	0	4	#DIV/0!
577	40S ribosomal protein SA OS=Homo sapiens GN=RPSA PE=1 SV=4	RSSA_HUMAN	RSSA	33 kDa	0.44	4.9	[]	0	0		0	14	1	0	15	#DIV/0!	69	1	3	73	#DIV/0!
456	WASH complex subunit FAM21A OS=Homo sapiens GN=FAM21A PE=1 SV=3	FA21A_HUMAN	FA21A	147 kDa	0.4	0.07	[]	0		0	0	15	0	0	15	#DIV/0!	0	1	0	1	#DIV/0!
1211	Loss of heterozygosity 12 chromosomal region 1 protein OS=Homo sapiens GN=LOH12CR1 PE=1 SV=1	L12R1_HUMAN	L12R1	22 kDa	0.74	0.7	[]	0		0	0	13	2	0	15	#DIV/0!	8	2	0	10	#DIV/0!
819	Mitochondrial ribonuclease P protein 1 OS=Homo sapiens GN=TRMT10C PE=1 SV=2	MRRP1_HUMAN	MRRP1	47 kDa	0.55	3.1	[]	0		0	0	13	0	2	15	#DIV/0!	46		0	46	#DIV/0!
1591	26S proteasome non-ATPase regulatory subunit 12 OS=Homo sapiens GN=PSMD12 PE=1 SV=3	PSD12_HUMAN	PSD12	53 kDa	0.96	0.9	[]	0		0	0	13	1	1	15	#DIV/0!	14	0	0	14	#DIV/0!
41	Sorbitol dehydrogenase OS=Homo sapiens GN=SORD PE=1 SV=4	DHSO_HUMAN	DHSO	38 kDa	0.14	0.07	[]	0			0	3	10	2	15	#DIV/0!	0		1	1	#DIV/0!
702	Heterogeneous nuclear ribonucleoprotein H3 OS=Homo sapiens GN=HNRNPH3 PE=1 SV=2	HNRH3_HUMAN	HNRH3	37 kDa	0.5	3.3	[]	0			0	13	2	0	15	#DIV/0!	49		3	52	#DIV/0!
1157	Nuclear pore complex protein Nup88 OS=Homo sapiens GN=NUP88 PE=1 SV=2	NUP88_HUMAN	NUP88	84 kDa	0.71	1.4	[]	0			0	13	2	0	15	#DIV/0!	13	3	5	21	#DIV/0!
1532	Coatomer subunit zeta-1 OS=Homo sapiens GN=COPZ1 PE=1 SV=1	COPZ1_HUMAN	COPZ1	20 kDa	0.92	0.9	[]		0	0	0	15			15	#DIV/0!	13			13	#DIV/0!
565	Integral membrane protein 2C OS=Homo sapiens GN=ITM2C PE=1 SV=1	ITM2C_HUMAN	ITM2C	30 kDa	0.44	0.1	[]				0	15	0	0	15	#DIV/0!	0	2		2	#DIV/0!
365	Lipid phosphate phosphohydrolase 3 OS=Homo sapiens GN=PPAP2B PE=1 SV=1	LPP3_HUMAN	LPP3	35 kDa	0.37	0	[]				0	15			15	#DIV/0!	0	0		0	#DIV/0!
1431	26S proteasome non-ATPase regulatory subunit 13 OS=Homo sapiens GN=PSMD13 PE=1 SV=2	PSD13_HUMAN	PSD13	43 kDa	0.86	0.8	[]				0	3	12	0	15	#DIV/0!	12	0	0	12	#DIV/0!
1669	Ras-related protein Rab-7L1 OS=Homo sapiens GN=RAB29 PE=1 SV=1	RAB7L_HUMAN	RAB7L	23 kDa	1	1	[]				0	14	1	0	15	#DIV/0!	11	4		15	#DIV/0!
1010	60S ribosomal protein L36 OS=Homo sapiens GN=RPL36 PE=1 SV=3	RL36_HUMAN	RL36	12 kDa	0.65	2.2	[]				0	15	0		15	#DIV/0!	33			33	#DIV/0!
1501	Endophilin-B1 OS=Homo sapiens GN=SH3GLB1 PE=1 SV=1	SHLB1_HUMAN	SHLB1	41 kDa	0.9	1.2	[]				0	15	0		15	#DIV/0!	18	0	0	18	#DIV/0!
929	ATP-binding cassette sub-family F member 1 OS=Homo sapiens GN=ABCF1 PE=1 SV=2	ABCF1_HUMAN	ABCF1	96 kDa	0.61	2.5	[]	0	0	0	0	0	16	0	16	#DIV/0!	40	0	0	40	#DIV/0!
443	Sodium/potassium-transporting ATPase subunit beta-1 OS=Homo sapiens GN=ATP1B1 PE=1 SV=1	AT1B1_HUMAN	AT1B1	35 kDa	0.4	0.4	[]	0	0	0	0	11	3	2	16	#DIV/0!	2		5	7	#DIV/0!
219	Lanosterol 14-alpha demethylase OS=Homo sapiens GN=CYP51A1 PE=1 SV=3	CP51A_HUMAN	CP51A	57 kDa	0.34	2.9	[]	0	0	0	0	14	2	0	16	#DIV/0!	29	18	0	47	#DIV/0!
547	Tyrosine-protein kinase JAK1 OS=Homo sapiens GN=JAK1 PE=1 SV=2	JAK1_HUMAN	JAK1	133 kDa	0.43	0.1	[]	0	0	0	0	16	0	0	16	#DIV/0!	2	0	0	2	#DIV/0!
1346	Protein transport protein Sec23B OS=Homo sapiens GN=SEC23B PE=1 SV=2	SC23B_HUMAN	SC23B	86 kDa	0.81	1.4	[]	0	0	0	0	16		0	16	#DIV/0!	22	1	0	23	#DIV/0!
555	Spermatogenesis-defective protein 39 homolog OS=Homo sapiens GN=VIPAS39 PE=1 SV=1	SPE39_HUMAN	SPE39	57 kDa	0.43	0.1	[]	0	0	0	0	16	0		16	#DIV/0!	2			2	#DIV/0!
883	Zyxin OS=Homo sapiens GN=ZYX PE=1 SV=1	ZYX_HUMAN	ZYX	61 kDa	0.59	0.5	[]	0	0	0	0	13	3	0	16	#DIV/0!	1	7	0	8	#DIV/0!
1506	28S ribosomal protein S5, mitochondrial OS=Homo sapiens GN=MRPS5 PE=1 SV=2	RT05_HUMAN	RT05	48 kDa	0.91	1.1	[]	0	0		0	3	9	4	16	#DIV/0!	16	0	2	18	#DIV/0!
727	Ribosome maturation protein SBDS OS=Homo sapiens GN=SBDS PE=1 SV=4	SBDS_HUMAN	SBDS	29 kDa	0.51	2.4	[]	0	0		0	10	6	0	16	#DIV/0!	33		6	39	#DIV/0!
1015	Developmentally-regulated GTP-binding protein 2 OS=Homo sapiens GN=DRG2 PE=1 SV=1	DRG2_HUMAN	DRG2	41 kDa	0.65	1.9	[]	0		0	0	6	10	0	16	#DIV/0!	28	1	1	30	#DIV/0!
1191	Ceramide synthase 2 OS=Homo sapiens GN=CERS2 PE=1 SV=1	CERS2_HUMAN	CERS2	45 kDa	0.73	1.4	[]	0			0	9	7	0	16	#DIV/0!	6	16		22	#DIV/0!
1280	Fibronectin type-III domain-containing protein 3A OS=Homo sapiens GN=FNDC3A PE=1 SV=4	FND3A_HUMAN	FND3A	132 kDa	0.77	1.6	[]	0			0	15	1	0	16	#DIV/0!	25	0	0	25	#DIV/0!
293	Volume-regulated anion channel subunit LRRC8A OS=Homo sapiens GN=LRRC8A PE=1 SV=1	LRC8A_HUMAN	LRC8A	94 kDa	0.37	0	[]	0			0	16			16	#DIV/0!	0		0	0	#DIV/0!
878	Sphingomyelin phosphodiesterase 4 OS=Homo sapiens GN=SMPD4 PE=1 SV=2	NSMA3_HUMAN	NSMA3	93 kDa	0.58	1.9	[]	0			0	13	0	3	16	#DIV/0!	23	7		30	#DIV/0!
1512	Transmembrane protein 43 OS=Homo sapiens GN=TMEM43 PE=1 SV=1	TMM43_HUMAN	TMM43	45 kDa	0.91	0.9	[]	0			0	14	2		16	#DIV/0!	11	3		14	#DIV/0!
184	Ubiquitin carboxyl-terminal hydrolase 15 OS=Homo sapiens GN=USP15 PE=1 SV=3	UBP15_HUMAN	UBP15	112 kDa	0.32	3.2	[]	0			0	10	6	0	16	#DIV/0!	12	36	3	51	#DIV/0!
991	Ubiquitin carboxyl-terminal hydrolase 7 OS=Homo sapiens GN=USP7 PE=1 SV=2	UBP7_HUMAN	UBP7	128 kDa	0.64	1.9	[]	0			0	6	5	5	16	#DIV/0!	30		1	31	#DIV/0!
1251	Ubiquitin carboxyl-terminal hydrolase isozyme L1 OS=Homo sapiens GN=UCHL1 PE=1 SV=2	UCHL1_HUMAN	UCHL1	25 kDa	0.76	1.6	[]	0			0	16			16	#DIV/0!	26	0		26	#DIV/0!
965	Tropomyosin alpha-3 chain OS=Homo sapiens GN=TPM3 PE=1 SV=2	TPM3_HUMAN	TPM3	33 kDa	0.62	0.6	[]		0	0	0	10	6	0	16	#DIV/0!	8	0	2	10	#DIV/0!
907	Vezatin OS=Homo sapiens GN=VEZT PE=1 SV=3	VEZA_HUMAN	VEZA	89 kDa	0.6	0.6	[]		0		0	2	11	3	16	#DIV/0!	0	7	3	10	#DIV/0!
1389	Carbonyl reductase [NADPH] 1 OS=Homo sapiens GN=CBR1 PE=1 SV=3	CBR1_HUMAN	CBR1	30 kDa	0.84	1.4	[]				0	16			16	#DIV/0!	22			22	#DIV/0!
554	Na(+)/H(+) exchange regulatory cofactor NHE-RF1 OS=Homo sapiens GN=SLC9A3R1 PE=1 SV=4	NHRF1_HUMAN	NHRF1	39 kDa	0.43	0.1	[]				0	16		0	16	#DIV/0!	0	2		2	#DIV/0!
761	DNA-directed RNA polymerases I, II, and III subunit RPABC3 OS=Homo sapiens GN=POLR2H PE=1 SV=4	RPAB3_HUMAN	RPAB3	17 kDa	0.52	3.6	[]				0	16			16	#DIV/0!	58			58	#DIV/0!
1226	Ras-related GTP-binding protein C OS=Homo sapiens GN=RRAGC PE=1 SV=1	RRAGC_HUMAN	RRAGC	44 kDa	0.75	1.4	[]				0	13	3		16	#DIV/0!	15	7		22	#DIV/0!
51	Protein transport protein Sec24A OS=Homo sapiens GN=SEC24A PE=1 SV=2	SC24A_HUMAN	SC24A	120 kDa	0.16	3	[]				0	6	9	1	16	#DIV/0!	13	27	8	48	#DIV/0!
811	Protein THEM6 OS=Homo sapiens GN=THEM6 PE=1 SV=2	THEM6_HUMAN	THEM6	24 kDa	0.55	0.3	[]				0	16			16	#DIV/0!	5			5	#DIV/0!
400	Phosphofurin acidic cluster sorting protein 1 OS=Homo sapiens GN=PACS1 PE=1 SV=2	PACS1_HUMAN	PACS1	105 kDa	0.39	0.4	[]	0	0	0	0	5	12	0	17	#DIV/0!	5	1	0	6	#DIV/0!
687	Phospholipase D1 OS=Homo sapiens GN=PLD1 PE=1 SV=1	PLD1_HUMAN	PLD1	124 kDa	0.49	0.5	[]	0	0		0	10	7	0	17	#DIV/0!	0	8	0	8	#DIV/0!
1579	Probable tRNA pseudouridine synthase 1 OS=Homo sapiens GN=TRUB1 PE=1 SV=1	TRUB1_HUMAN	TRUB1	37 kDa	0.95	1.1	[]	0	0		0	3	8	6	17	#DIV/0!	16		2	18	#DIV/0!
947	MAGUK p55 subfamily member 6 OS=Homo sapiens GN=MPP6 PE=1 SV=2	MPP6_HUMAN	MPP6	61 kDa	0.62	0.4	[]	0		0	0	17	0	0	17	#DIV/0!	7	0		7	#DIV/0!
145	C2 calcium-dependent domain-containing protein 4C OS=Homo sapiens GN=C2CD4C PE=1 SV=2	C2C4C_HUMAN	C2C4C	45 kDa	0.29	0.3	[]	0			0	9	8	0	17	#DIV/0!	0	5		5	#DIV/0!
1430	Uncharacterized protein C19orf43 OS=Homo sapiens GN=C19orf43 PE=1 SV=1	CS043_HUMAN	CS043	18 kDa	0.86	0.8	[]		0		0	17			17	#DIV/0!	13	0	0	13	#DIV/0!
848	Isocitrate dehydrogenase [NAD] subunit beta, mitochondrial OS=Homo sapiens GN=IDH3B PE=1 SV=2	IDH3B_HUMAN	IDH3B	42 kDa	0.57	2.8	[]			0	0	14	1	2	17	#DIV/0!	48		0	48	#DIV/0!
685	A-kinase anchor protein 10, mitochondrial OS=Homo sapiens GN=AKAP10 PE=1 SV=2	AKA10_HUMAN	AKA10	74 kDa	0.49	0.2	[]				0	17			17	#DIV/0!	3	1		4	#DIV/0!
847	Lactoylglutathione lyase OS=Homo sapiens GN=GLO1 PE=1 SV=4	LGUL_HUMAN	LGUL	21 kDa	0.57	2.8	[]				0	17	0	0	17	#DIV/0!	47	0	1	48	#DIV/0!
536	StAR-related lipid transfer protein 3 OS=Homo sapiens GN=STARD3 PE=1 SV=2	STAR3_HUMAN	STAR3	51 kDa	0.43	0.3	[]				0	14	3		17	#DIV/0!	0	5	0	5	#DIV/0!
590	Eukaryotic translation initiation factor 3 subunit A OS=Homo sapiens GN=EIF3A PE=1 SV=1	EIF3A_HUMAN	EIF3A	167 kDa	0.45	6.2	[]	0	0	0	0	8	4	6	18	#DIV/0!	112	0	0	112	#DIV/0!
670	Nicalin OS=Homo sapiens GN=NCLN PE=1 SV=2	NCLN_HUMAN	NCLN	63 kDa	0.49	0.5	[]	0	0		0	11	4	3	18	#DIV/0!	9		0	9	#DIV/0!
759	Protein kinase C delta type OS=Homo sapiens GN=PRKCD PE=1 SV=2	KPCD_HUMAN	KPCD	78 kDa	0.52	0.3	[]	0		0	0	17		1	18	#DIV/0!	5	1		6	#DIV/0!
1449	Aspartate--tRNA ligase, mitochondrial OS=Homo sapiens GN=DARS2 PE=1 SV=1	SYDM_HUMAN	SYDM	74 kDa	0.87	1.3	[]	0		0	0	0	0	18	18	#DIV/0!	23		0	23	#DIV/0!
1216	Transducin beta-like protein 2 OS=Homo sapiens GN=TBL2 PE=1 SV=1	TBL2_HUMAN	TBL2	50 kDa	0.74	1.3	[]	0		0	0	15	1	2	18	#DIV/0!	11	12	1	24	#DIV/0!
234	Tyrosine-protein phosphatase non-receptor type 2 OS=Homo sapiens GN=PTPN2 PE=1 SV=2	PTN2_HUMAN	PTN2	48 kDa	0.35	0.1	[]	0			0	16	1	1	18	#DIV/0!	0	2	0	2	#DIV/0!
1607	Heterogeneous nuclear ribonucleoprotein A/B OS=Homo sapiens GN=HNRNPAB PE=1 SV=2	ROAA_HUMAN	ROAA	36 kDa	0.97	1.1	[]	0			0	13	5	0	18	#DIV/0!	19	0		19	#DIV/0!
840	Selenoprotein S OS=Homo sapiens GN=VIMP PE=1 SV=3	SELS_HUMAN	SELS	21 kDa	0.56	0.3	[]	0			0	18			18	#DIV/0!	6			6	#DIV/0!
1441	Serine/threonine-protein kinase 26 OS=Homo sapiens GN=STK26 PE=1 SV=2	STK26_HUMAN	STK26	47 kDa	0.87	1.3	[]	0			0	17	0	1	18	#DIV/0!	23		0	23	#DIV/0!
1243	Protein TBRG4 OS=Homo sapiens GN=TBRG4 PE=1 SV=1	TBRG4_HUMAN	TBRG4	71 kDa	0.76	0.8	[]	0			0	7		11	18	#DIV/0!	8		6	14	#DIV/0!
1294	3-mercaptopyruvate sulfurtransferase OS=Homo sapiens GN=MPST PE=1 SV=3	THTM_HUMAN	THTM	33 kDa	0.78	1.6	[]	0			0	18		0	18	#DIV/0!	28		0	28	#DIV/0!
1436	Ribosome biogenesis protein NSA2 homolog OS=Homo sapiens GN=NSA2 PE=1 SV=1	NSA2_HUMAN	NSA2	30 kDa	0.87	1.3	[]		0	0	0	18	0	0	18	#DIV/0!	22	0	1	23	#DIV/0!
477	Polyadenylate-binding protein 4 OS=Homo sapiens GN=PABPC4 PE=1 SV=1	PABP4_HUMAN	PABP4	71 kDa	0.41	6.5	[]		0		0	12	6	0	18	#DIV/0!	111		6	117	#DIV/0!
1221	5'-AMP-activated protein kinase subunit gamma-1 OS=Homo sapiens GN=PRKAG1 PE=1 SV=1	AAKG1_HUMAN	AAKG1	38 kDa	0.75	1.4	[]			0	0	9	7	2	18	#DIV/0!	21		4	25	#DIV/0!
998	Proteasome subunit beta type-2 OS=Homo sapiens GN=PSMB2 PE=1 SV=1	PSB2_HUMAN	PSB2	23 kDa	0.64	2.2	[]				0	18	0	0	18	#DIV/0!	38		1	39	#DIV/0!
428	ATP-dependent RNA helicase DHX29 OS=Homo sapiens GN=DHX29 PE=1 SV=2	DHX29_HUMAN	DHX29	155 kDa	0.4	0.3	[]	0	0	0	0	0	15	4	19	#DIV/0!	1	4	1	6	#DIV/0!
1574	28 kDa heat- and acid-stable phosphoprotein OS=Homo sapiens GN=PDAP1 PE=1 SV=1	HAP28_HUMAN	HAP28	21 kDa	0.95	1.1	[]	0	0	0	0	19		0	19	#DIV/0!	0	21	0	21	#DIV/0!
403	Nck-associated protein 5-like OS=Homo sapiens GN=NCKAP5L PE=1 SV=2	NCK5L_HUMAN	NCK5L	139 kDa	0.39	0.1	[]	0	0	0	0	18	1		19	#DIV/0!	2	0	0	2	#DIV/0!
1470	Phosphatidylinositol 5-phosphate 4-kinase type-2 gamma OS=Homo sapiens GN=PIP4K2C PE=1 SV=3	PI42C_HUMAN	PI42C	47 kDa	0.89	0.8	[]	0	0	0	0	17	1	1	19	#DIV/0!	13	3	0	16	#DIV/0!
1185	Sorting nexin-9 OS=Homo sapiens GN=SNX9 PE=1 SV=1	SNX9_HUMAN	SNX9	67 kDa	0.73	0.6	[]	0	0	0	0	18	1	0	19	#DIV/0!	7	5	0	12	#DIV/0!
1288	UDP-glucose:glycoprotein glucosyltransferase 1 OS=Homo sapiens GN=UGGT1 PE=1 SV=3	UGGG1_HUMAN	UGGG1	177 kDa	0.77	1.5	[]	0	0	0	0	1	16	2	19	#DIV/0!	29	0		29	#DIV/0!
784	Alpha-aminoadipic semialdehyde dehydrogenase OS=Homo sapiens GN=ALDH7A1 PE=1 SV=5	AL7A1_HUMAN	AL7A1	58 kDa	0.54	2.8	[]	0	0		0	12	3	4	19	#DIV/0!	52	0	2	54	#DIV/0!
1037	DCN1-like protein 3 OS=Homo sapiens GN=DCUN1D3 PE=1 SV=1	DCNL3_HUMAN	DCNL3	34 kDa	0.66	0.7	[]	0	0		0	12	7	0	19	#DIV/0!	5	8	0	13	#DIV/0!
1395	Exosome complex exonuclease RRP44 OS=Homo sapiens GN=DIS3 PE=1 SV=2	RRP44_HUMAN	RRP44	109 kDa	0.84	1.2	[]	0	0		0	3	11	5	19	#DIV/0!	15	2	5	22	#DIV/0!
1261	ADP-ribosylation factor GTPase-activating protein 2 OS=Homo sapiens GN=ARFGAP2 PE=1 SV=1	ARFG2_HUMAN	ARFG2	57 kDa	0.76	0.8	[]	0		0	0	8	11	0	19	#DIV/0!	7	0	8	15	#DIV/0!
1252	G-rich sequence factor 1 OS=Homo sapiens GN=GRSF1 PE=1 SV=3	GRSF1_HUMAN	GRSF1	53 kDa	0.76	1.5	[]	0			0	6		13	19	#DIV/0!	26		2	28	#DIV/0!
1420	Integrin alpha-2 OS=Homo sapiens GN=ITGA2 PE=1 SV=1	ITA2_HUMAN	ITA2	129 kDa	0.85	0.8	[]	0			0	9	10	0	19	#DIV/0!	3	13		16	#DIV/0!
762	Macoilin OS=Homo sapiens GN=TMEM57 PE=1 SV=1	MACOI_HUMAN	MACOI	76 kDa	0.52	1.7	[]	0			0	3	13	3	19	#DIV/0!	7	21	4	32	#DIV/0!
380	NADPH--cytochrome P450 reductase OS=Homo sapiens GN=POR PE=1 SV=2	NCPR_HUMAN	NCPR	77 kDa	0.38	2.5	[]	0			0	17	2	0	19	#DIV/0!	27	21	0	48	#DIV/0!
1158	26S protease regulatory subunit 6B OS=Homo sapiens GN=PSMC4 PE=1 SV=2	PRS6B_HUMAN	PRS6B	47 kDa	0.71	1.7	[]	0			0	15	2	2	19	#DIV/0!	33	0	0	33	#DIV/0!
904	Mitochondrial-processing peptidase subunit alpha OS=Homo sapiens GN=PMPCA PE=1 SV=2	MPPA_HUMAN	MPPA	58 kDa	0.6	1.7	[]			0	0	7	4	8	19	#DIV/0!	25		7	32	#DIV/0!
758	Dual specificity mitogen-activated protein kinase kinase 2 OS=Homo sapiens GN=MAP2K2 PE=1 SV=1	MP2K2_HUMAN	MP2K2	44 kDa	0.52	2.6	[]				0	7	8	4	19	#DIV/0!	43		4	47	#DIV/0!
43	Regulator of chromosome condensation OS=Homo sapiens GN=RCC1 PE=1 SV=1	RCC1_HUMAN	RCC1	45 kDa	0.14	0	[]				0		7	12	19	#DIV/0!	0			0	#DIV/0!
638	Protein transport protein Sec61 subunit alpha isoform 1 OS=Homo sapiens GN=SEC61A1 PE=1 SV=2	S61A1_HUMAN	S61A1	52 kDa	0.47	0.4	[]				0	15	4	0	19	#DIV/0!	7			7	#DIV/0!
1044	Ubiquitin-conjugating enzyme E2 D3 OS=Homo sapiens GN=UBE2D3 PE=1 SV=1	UB2D3_HUMAN	UB2D3	17 kDa	0.66	2.1	[]				0	19			19	#DIV/0!	40			40	#DIV/0!
21	Argininosuccinate synthase OS=Homo sapiens GN=ASS1 PE=1 SV=2	ASSY_HUMAN	ASSY	47 kDa	0.1	0.3	[]	0	0	0	0	4	9	7	20	#DIV/0!	2		5	7	#DIV/0!
535	Chromodomain-helicase-DNA-binding protein 4 OS=Homo sapiens GN=CHD4 PE=1 SV=2	CHD4_HUMAN	CHD4	218 kDa	0.43	4.2	[]	0	0	0	0	13	7	0	20	#DIV/0!	75	6	2	83	#DIV/0!
498	G protein-coupled receptor kinase 6 OS=Homo sapiens GN=GRK6 PE=1 SV=2	GRK6_HUMAN	GRK6	66 kDa	0.42	0.1	[]	0	0	0	0	20	0	0	20	#DIV/0!	1	1	0	2	#DIV/0!
481	Ral GTPase-activating protein subunit alpha-2 OS=Homo sapiens GN=RALGAPA2 PE=1 SV=2	RGPA2_HUMAN	RGPA2	211 kDa	0.41	0.2	[]	0	0	0	0	17	3	0	20	#DIV/0!	5	0	0	5	#DIV/0!
8	Eukaryotic peptide chain release factor subunit 1 OS=Homo sapiens GN=ETF1 PE=1 SV=3	ERF1_HUMAN	ERF1	49 kDa	0.06	0.2	[]	0	0		0	3	9	8	20	#DIV/0!	3		1	4	#DIV/0!
453	LIM domain and actin-binding protein 1 OS=Homo sapiens GN=LIMA1 PE=1 SV=1	LIMA1_HUMAN	LIMA1	85 kDa	0.4	1.9	[]	0	0		0	0	14	6	20	#DIV/0!	22	5	11	38	#DIV/0!
419	Splicing factor 3B subunit 2 OS=Homo sapiens GN=SF3B2 PE=1 SV=2	SF3B2_HUMAN	SF3B2	100 kDa	0.4	3.1	[]	0	0		0	18	2	0	20	#DIV/0!	46	13	2	61	#DIV/0!
77	USP6 N-terminal-like protein OS=Homo sapiens GN=USP6NL PE=1 SV=3	US6NL_HUMAN	US6NL	94 kDa	0.2	0.2	[]	0		0	0	12	8		20	#DIV/0!	0	3	0	3	#DIV/0!
1602	Copper-transporting ATPase 1 OS=Homo sapiens GN=ATP7A PE=1 SV=3	ATP7A_HUMAN	ATP7A	163 kDa	0.96	1	[]	0			0	16	4	0	20	#DIV/0!	3	16	0	19	#DIV/0!
364	Cerebral cavernous malformations 2 protein OS=Homo sapiens GN=CCM2 PE=1 SV=1	CCM2_HUMAN	CCM2	49 kDa	0.37	0	[]	0			0	20		0	20	#DIV/0!	0	0		0	#DIV/0!
1592	Elongation factor G, mitochondrial OS=Homo sapiens GN=GFM1 PE=1 SV=2	EFGM_HUMAN	EFGM	83 kDa	0.96	1	[]	0			0	7		13	20	#DIV/0!	16		3	19	#DIV/0!
1110	Exocyst complex component 4 OS=Homo sapiens GN=EXOC4 PE=1 SV=1	EXOC4_HUMAN	EXOC4	111 kDa	0.69	0.6	[]	0			0	16	3	1	20	#DIV/0!	12	0		12	#DIV/0!
634	Phosphatidylinositol-binding clathrin assembly protein OS=Homo sapiens GN=PICALM PE=1 SV=2	PICAL_HUMAN	PICAL	71 kDa	0.47	0.4	[]	0			0	4	16	0	20	#DIV/0!	4	4	0	8	#DIV/0!
876	Vang-like protein 2 OS=Homo sapiens GN=VANGL2 PE=1 SV=2	VANG2_HUMAN	VANG2	60 kDa	0.58	0.4	[]		0	0	0	19	1		20	#DIV/0!	0	8	0	8	#DIV/0!
333	Tumor necrosis factor receptor superfamily member 10B OS=Homo sapiens GN=TNFRSF10B PE=1 SV=2	TR10B_HUMAN	TR10B	48 kDa	0.37	0	[]			0	0	20			20	#DIV/0!	0		0	0	#DIV/0!
1564	Transmembrane and coiled-coil domain-containing protein 1 OS=Homo sapiens GN=TMCO1 PE=1 SV=1	TMCO1_HUMAN	TMCO1	21 kDa	0.94	0.9	[]				0	20	0	0	20	#DIV/0!	16	2		18	#DIV/0!
899	1-phosphatidylinositol 3-phosphate 5-kinase OS=Homo sapiens GN=PIKFYVE PE=1 SV=3	FYV1_HUMAN	FYV1	237 kDa	0.59	0.4	[]	0	0	0	0	21	0	0	21	#DIV/0!	8	0	0	8	#DIV/0!
488	Cytochrome b-c1 complex subunit 2, mitochondrial OS=Homo sapiens GN=UQCRC2 PE=1 SV=3	QCR2_HUMAN	QCR2	48 kDa	0.42	0.6	[]	0	0	0	0	2	8	11	21	#DIV/0!	6		6	12	#DIV/0!
1611	Sodium-coupled neutral amino acid transporter 9 OS=Homo sapiens GN=SLC38A9 PE=1 SV=2	S38A9_HUMAN	S38A9	64 kDa	0.97	1	[]	0	0	0	0	21	0	0	21	#DIV/0!	15	7		22	#DIV/0!
480	Rab11 family-interacting protein 2 OS=Homo sapiens GN=RAB11FIP2 PE=1 SV=1	RFIP2_HUMAN	RFIP2	58 kDa	0.41	0.2	[]	0	0		0	18	3	0	21	#DIV/0!	0	5	0	5	#DIV/0!
260	Heat shock 70 kDa protein 4 OS=Homo sapiens GN=HSPA4 PE=1 SV=4	HSP74_HUMAN	HSP74	94 kDa	0.36	8.6	[]	0		0	0	15	4	2	21	#DIV/0!	141	2	15	158	#DIV/0!
704	Solute carrier family 12 member 4 OS=Homo sapiens GN=SLC12A4 PE=1 SV=2	S12A4_HUMAN	S12A4	121 kDa	0.5	0.2	[]	0		0	0	21			21	#DIV/0!	5	0	0	5	#DIV/0!
143	Charged multivesicular body protein 6 OS=Homo sapiens GN=CHMP6 PE=1 SV=3	CHMP6_HUMAN	CHMP6	23 kDa	0.29	0.3	[]	0			0	12	9	0	21	#DIV/0!	6	0	0	6	#DIV/0!
86	Eukaryotic translation initiation factor 2 subunit 2 OS=Homo sapiens GN=EIF2S2 PE=1 SV=2	IF2B_HUMAN	IF2B	38 kDa	0.21	0.4	[]	0			0	5	8	8	21	#DIV/0!	8		1	9	#DIV/0!
735	Inosine-5'-monophosphate dehydrogenase 2 OS=Homo sapiens GN=IMPDH2 PE=1 SV=2	IMDH2_HUMAN	IMDH2	56 kDa	0.51	3.8	[]	0			0	18	3	0	21	#DIV/0!	79			79	#DIV/0!
1604	SAP30-binding protein OS=Homo sapiens GN=SAP30BP PE=1 SV=1	S30BP_HUMAN	S30BP	34 kDa	0.97	1	[]	0			0	19	2	0	21	#DIV/0!	13	9	0	22	#DIV/0!
1459	Transmembrane protein 33 OS=Homo sapiens GN=TMEM33 PE=1 SV=2	TMM33_HUMAN	TMM33	28 kDa	0.88	0.8	[]	0			0	19	1	1	21	#DIV/0!	17			17	#DIV/0!
1383	Copine-3 OS=Homo sapiens GN=CPNE3 PE=1 SV=1	CPNE3_HUMAN	CPNE3	60 kDa	0.83	1.3	[]		0		0	15	6	0	21	#DIV/0!	28	0	0	28	#DIV/0!
1667	Cysteine and glycine-rich protein 1 OS=Homo sapiens GN=CSRP1 PE=1 SV=3	CSRP1_HUMAN	CSRP1	21 kDa	1	1	[]			0	0	21			21	#DIV/0!	21	0		21	#DIV/0!
561	DNA replication licensing factor MCM4 OS=Homo sapiens GN=MCM4 PE=1 SV=5	MCM4_HUMAN	MCM4	97 kDa	0.44	4.3	[]				0	7	9	5	21	#DIV/0!	83	0	7	90	#DIV/0!
1380	Vacuolar protein sorting-associated protein 35 OS=Homo sapiens GN=VPS35 PE=1 SV=2	VPS35_HUMAN	VPS35	92 kDa	0.83	1.4	[]				0	20	1	0	21	#DIV/0!	29			29	#DIV/0!
1122	Eukaryotic translation initiation factor 3 subunit C-like protein OS=Homo sapiens GN=EIF3CL PE=3 SV=1	EIFCL_HUMAN	EIFCL	105 kDa	0.7	1.6	[]	0	0	0	0	13	8	1	22	#DIV/0!	31	0	4	35	#DIV/0!
1019	Midasin OS=Homo sapiens GN=MDN1 PE=1 SV=2	MDN1_HUMAN	MDN1	633 kDa	0.65	1.7	[]	0	0	0	0	15	4	3	22	#DIV/0!	33	3	2	38	#DIV/0!
1616	MICOS complex subunit MIC19 OS=Homo sapiens GN=CHCHD3 PE=1 SV=1	MIC19_HUMAN	MIC19	26 kDa	0.97	1	[]	0	0	0	0	22	0		22	#DIV/0!	15	8		23	#DIV/0!
628	Protein transport protein Sec24C OS=Homo sapiens GN=SEC24C PE=1 SV=3	SC24C_HUMAN	SC24C	118 kDa	0.47	0.5	[]	0	0	0	0	6	15	1	22	#DIV/0!	3	5	4	12	#DIV/0!
1109	Serine/arginine repetitive matrix protein 2 OS=Homo sapiens GN=SRRM2 PE=1 SV=2	SRRM2_HUMAN	SRRM2	300 kDa	0.69	1.9	[]	0	0	0	0	22	0	0	22	#DIV/0!	39	1	1	41	#DIV/0!
804	Treacle protein OS=Homo sapiens GN=TCOF1 PE=1 SV=3	TCOF_HUMAN	TCOF	152 kDa	0.54	3	[]	0	0	0	0	17	5	0	22	#DIV/0!	65	0	1	66	#DIV/0!
1562	Vacuolar protein sorting-associated protein 26A OS=Homo sapiens GN=VPS26A PE=1 SV=2	VP26A_HUMAN	VP26A	38 kDa	0.94	0.9	[]	0	0	0	0	17	3	2	22	#DIV/0!	20		0	20	#DIV/0!
879	Probable ATP-dependent RNA helicase YTHDC2 OS=Homo sapiens GN=YTHDC2 PE=1 SV=2	YTDC2_HUMAN	YTDC2	160 kDa	0.58	2	[]	0	0	0	0	0	22	0	22	#DIV/0!	34	9	1	44	#DIV/0!
1318	ATP-dependent 6-phosphofructokinase, muscle type OS=Homo sapiens GN=PFKM PE=1 SV=2	PFKAM_HUMAN	PFKAM	85 kDa	0.79	1.4	[]	0	0		0	7	3	12	22	#DIV/0!	28	0		28	#DIV/0!
1003	Amyloid beta A4 protein OS=Homo sapiens GN=APP PE=1 SV=3	A4_HUMAN	A4	87 kDa	0.64	1.3	[]	0		0	0	3	13	6	22	#DIV/0!	12	12	4	28	#DIV/0!
64	Sprouty-related, EVH1 domain-containing protein 1 OS=Homo sapiens GN=SPRED1 PE=1 SV=2	SPRE1_HUMAN	SPRE1	50 kDa	0.17	0.2	[]	0		0	0	14	5	3	22	#DIV/0!		4		4	#DIV/0!
1140	TBC1 domain family member 2B OS=Homo sapiens GN=TBC1D2B PE=1 SV=2	TBD2B_HUMAN	TBD2B	110 kDa	0.71	0.6	[]	0		0	0	20	1	1	22	#DIV/0!	12		1	13	#DIV/0!
846	Deubiquitinating protein VCIP135 OS=Homo sapiens GN=VCPIP1 PE=1 SV=2	VCIP1_HUMAN	VCIP1	134 kDa	0.56	0.6	[]	0		0	0	5	14	3	22	#DIV/0!	2	11	0	13	#DIV/0!
710	CDGSH iron-sulfur domain-containing protein 2 OS=Homo sapiens GN=CISD2 PE=1 SV=1	CISD2_HUMAN	CISD2	15 kDa	0.5	0.3	[]	0			0	20	0	2	22	#DIV/0!	7	0		7	#DIV/0!
563	Importin-7 OS=Homo sapiens GN=IPO7 PE=1 SV=1	IPO7_HUMAN	IPO7	120 kDa	0.44	4.8	[]	0			0	14	6	2	22	#DIV/0!	100	0	6	106	#DIV/0!
1146	Proteasome inhibitor PI31 subunit OS=Homo sapiens GN=PSMF1 PE=1 SV=2	PSMF1_HUMAN	PSMF1	30 kDa	0.71	0.7	[]			0	0	6	13	3	22	#DIV/0!	15		0	15	#DIV/0!
1432	Cell division control protein 42 homolog OS=Homo sapiens GN=CDC42 PE=1 SV=2	CDC42_HUMAN	CDC42	21 kDa	0.86	1.2	[]				0	14	8	0	22	#DIV/0!	25		2	27	#DIV/0!
1447	AP-3 complex subunit beta-1 OS=Homo sapiens GN=AP3B1 PE=1 SV=3	AP3B1_HUMAN	AP3B1	121 kDa	0.87	1.2	[]	0	0	0	0	17	6		23	#DIV/0!	26	2	0	28	#DIV/0!
1169	Condensin complex subunit 2 OS=Homo sapiens GN=NCAPH PE=1 SV=3	CND2_HUMAN	CND2	83 kDa	0.72	1.5	[]	0	0	0	0	2	13	8	23	#DIV/0!	29	0	5	34	#DIV/0!
1350	ATP-dependent RNA helicase DDX19A OS=Homo sapiens GN=DDX19A PE=1 SV=1	DD19A_HUMAN	DD19A	54 kDa	0.81	1.3	[]	0	0	0	0	7	3	13	23	#DIV/0!	27	0	3	30	#DIV/0!
196	55 kDa erythrocyte membrane protein OS=Homo sapiens GN=MPP1 PE=1 SV=2	EM55_HUMAN	EM55	52 kDa	0.32	0.3	[]	0	0	0	0	16	5	2	23	#DIV/0!	4	4	0	8	#DIV/0!
178	Host cell factor 1 OS=Homo sapiens GN=HCFC1 PE=1 SV=2	HCFC1_HUMAN	HCFC1	209 kDa	0.32	2.4	[]	0	0	0	0	8	12	3	23	#DIV/0!	36	12	7	55	#DIV/0!
104	Kinesin-like protein KIF16B OS=Homo sapiens GN=KIF16B PE=1 SV=2	KI16B_HUMAN	KI16B	152 kDa	0.24	0.04	[]	0	0	0	0	5	18	0	23	#DIV/0!	1	0	0	1	#DIV/0!
1050	Receptor expression-enhancing protein 5 OS=Homo sapiens GN=REEP5 PE=1 SV=3	REEP5_HUMAN	REEP5	21 kDa	0.66	0.5	[]	0		0	0	23			23	#DIV/0!	11			11	#DIV/0!
1450	Ubiquitin carboxyl-terminal hydrolase 14 OS=Homo sapiens GN=USP14 PE=1 SV=3	UBP14_HUMAN	UBP14	56 kDa	0.87	1.1	[]	0		0	0	9	14	0	23	#DIV/0!	17	5	4	26	#DIV/0!
1258	Calpain-1 catalytic subunit OS=Homo sapiens GN=CAPN1 PE=1 SV=1	CAN1_HUMAN	CAN1	82 kDa	0.76	0.7	[]	0			0	1	7	15	23	#DIV/0!	15	1	1	17	#DIV/0!
84	Hsp90 co-chaperone Cdc37 OS=Homo sapiens GN=CDC37 PE=1 SV=1	CDC37_HUMAN	CDC37	44 kDa	0.21	0.3	[]	0			0	11	8	4	23	#DIV/0!	8		0	8	#DIV/0!
194	Insulin-like growth factor 2 mRNA-binding protein 2 OS=Homo sapiens GN=IGF2BP2 PE=1 SV=2	IF2B2_HUMAN	IF2B2	66 kDa	0.32	4.9	[]	0			0	15		8	23	#DIV/0!	57	4	12	73	#DIV/0!
23	Mitogen-activated protein kinase kinase kinase MLK4 OS=Homo sapiens GN=MLK4 PE=1 SV=1	M3KL4_HUMAN	M3KL4	114 kDa	0.1	0.2	[]	0			0	12	7	4	23	#DIV/0!	0	5	0	5	#DIV/0!
141	Protein kinase C delta-binding protein OS=Homo sapiens GN=PRKCDBP PE=1 SV=3	PRDBP_HUMAN	PRDBP	28 kDa	0.29	0.2	[]				0	16	7		23	#DIV/0!	5	0		5	#DIV/0!
1525	Ras-related protein Rap-2b OS=Homo sapiens GN=RAP2B PE=1 SV=1	RAP2B_HUMAN	RAP2B	21 kDa	0.92	1.1	[]				0	20		3	23	#DIV/0!	22		4	26	#DIV/0!
332	Target of rapamycin complex 2 subunit MAPKAP1 OS=Homo sapiens GN=MAPKAP1 PE=1 SV=2	SIN1_HUMAN	SIN1	59 kDa	0.37	0	[]				0	23			23	#DIV/0!			0	0	#DIV/0!
490	Flap endonuclease 1 OS=Homo sapiens GN=FEN1 PE=1 SV=1	FEN1_HUMAN	FEN1	43 kDa	0.42	2.6	[]	0	0	0	0	1	17	6	24	#DIV/0!	48	10	5	63	#DIV/0!
1464	DNA mismatch repair protein Msh6 OS=Homo sapiens GN=MSH6 PE=1 SV=2	MSH6_HUMAN	MSH6	153 kDa	0.88	1.2	[]	0	0	0	0	0	16	8	24	#DIV/0!	29	0	0	29	#DIV/0!
1560	Inositol polyphosphate 5-phosphatase OCRL-1 OS=Homo sapiens GN=OCRL PE=1 SV=3	OCRL_HUMAN	OCRL	104 kDa	0.94	0.9	[]	0	0	0	0	21	3	0	24	#DIV/0!	16	6	0	22	#DIV/0!
913	Sickle tail protein homolog OS=Homo sapiens GN=KIAA1217 PE=1 SV=2	SKT_HUMAN	SKT	214 kDa	0.6	0.4	[]	0	0	0	0	23	1	0	24	#DIV/0!	10	0		10	#DIV/0!
1001	SUN domain-containing protein 1 OS=Homo sapiens GN=SUN1 PE=1 SV=3	SUN1_HUMAN	SUN1	90 kDa	0.64	0.5	[]	0	0	0	0	24	0	0	24	#DIV/0!	10	0	1	11	#DIV/0!
902	Alanine--tRNA ligase, mitochondrial OS=Homo sapiens GN=AARS2 PE=1 SV=1	SYAM_HUMAN	SYAM	107 kDa	0.59	1.9	[]	0	0	0	0	4	0	20	24	#DIV/0!	37	0	9	46	#DIV/0!
1609	Lymphokine-activated killer T-cell-originated protein kinase OS=Homo sapiens GN=PBK PE=1 SV=3	TOPK_HUMAN	TOPK	36 kDa	0.97	1	[]	0	0	0	0	11	9	4	24	#DIV/0!	22	0	1	23	#DIV/0!
1098	Dihydrolipoyl dehydrogenase, mitochondrial OS=Homo sapiens GN=DLD PE=1 SV=2	DLDH_HUMAN	DLDH	54 kDa	0.68	0.5	[]	0	0		0	0	24	0	24	#DIV/0!	6	0	7	13	#DIV/0!
1156	Dynamin-1-like protein OS=Homo sapiens GN=DNM1L PE=1 SV=2	DNM1L_HUMAN	DNM1L	82 kDa	0.71	1.5	[]	0		0	0	12	10	2	24	#DIV/0!	29	5	1	35	#DIV/0!
956	Insulin receptor OS=Homo sapiens GN=INSR PE=1 SV=4	INSR_HUMAN	INSR	156 kDa	0.62	0.4	[]	0			0	24		0	24	#DIV/0!	10		0	10	#DIV/0!
1069	KH domain-containing, RNA-binding, signal transduction-associated protein 1 OS=Homo sapiens GN=KHDRBS1 PE=1 SV=1	KHDR1_HUMAN	KHDR1	48 kDa	0.67	0.6	[]	0			0	3	20	1	24	#DIV/0!	13		1	14	#DIV/0!
950	Survival motor neuron protein OS=Homo sapiens GN=SMN1 PE=1 SV=1	SMN_HUMAN	SMN	32 kDa	0.62	2.4	[]	0			0	24	0	0	24	#DIV/0!	58		0	58	#DIV/0!
393	Stress-induced-phosphoprotein 1 OS=Homo sapiens GN=STIP1 PE=1 SV=1	STIP1_HUMAN	STIP1	63 kDa	0.39	7	[]	0			0	18	4	2	24	#DIV/0!	154	5	9	168	#DIV/0!
495	Translationally-controlled tumor protein OS=Homo sapiens GN=TPT1 PE=1 SV=1	TCTP_HUMAN	TCTP	20 kDa	0.42	4.5	[]	0			0	16	8	0	24	#DIV/0!	97		11	108	#DIV/0!
828	26S protease regulatory subunit 10B OS=Homo sapiens GN=PSMC6 PE=1 SV=1	PRS10_HUMAN	PRS10	44 kDa	0.56	2.9	[]		0		0	19	5	0	24	#DIV/0!	70	0		70	#DIV/0!
1657	5'-AMP-activated protein kinase catalytic subunit alpha-1 OS=Homo sapiens GN=PRKAA1 PE=1 SV=4	AAPK1_HUMAN	AAPK1	64 kDa	1	1	[]	0	0	0	0	13	7	5	25	#DIV/0!	20		5	25	#DIV/0!
388	Eukaryotic translation initiation factor 4 gamma 3 OS=Homo sapiens GN=EIF4G3 PE=1 SV=2	IF4G3_HUMAN	IF4G3	177 kDa	0.38	5.9	[]	0	0		0	14	4	7	25	#DIV/0!	84	7	7	98	#DIV/0!
138	TBC1 domain family member 22B OS=Homo sapiens GN=TBC1D22B PE=1 SV=3	TB22B_HUMAN	TB22B	59 kDa	0.29	0.3	[]	0	0		0	17	7	1	25	#DIV/0!	2	5	0	7	#DIV/0!
231	Carboxyl-terminal PDZ ligand of neuronal nitric oxide synthase protein OS=Homo sapiens GN=NOS1AP PE=1 SV=3	CAPON_HUMAN	CAPON	56 kDa	0.35	0	[]	0		0	0	24	1		25	#DIV/0!	0			0	#DIV/0!
1471	Dual specificity protein phosphatase 3 OS=Homo sapiens GN=DUSP3 PE=1 SV=1	DUS3_HUMAN	DUS3	20 kDa	0.89	1.2	[]				0	25			25	#DIV/0!	31			31	#DIV/0!
182	Transmembrane protein 185B OS=Homo sapiens GN=TMEM185B PE=1 SV=2	T185B_HUMAN	T185B	41 kDa	0.32	0.2	[]				0	19	6		25	#DIV/0!	0	5	0	5	#DIV/0!
93	TOX high mobility group box family member 4 OS=Homo sapiens GN=TOX4 PE=1 SV=1	TOX4_HUMAN	TOX4	66 kDa	0.23	2.1	[]				0	10	15	0	25	#DIV/0!	23	22	8	53	#DIV/0!
273	Uncharacterized protein C1orf226 OS=Homo sapiens GN=C1orf226 PE=1 SV=1	CA226_HUMAN	CA226	29 kDa	0.37	0.2	[]	0	0	0	0	23	3		26	#DIV/0!	3	1		4	#DIV/0!
937	Cullin-4B OS=Homo sapiens GN=CUL4B PE=1 SV=4	CUL4B_HUMAN	CUL4B	104 kDa	0.61	0.5	[]	0	0	0	0	4	22	0	26	#DIV/0!	9		5	14	#DIV/0!
1478	Desmocollin-3 OS=Homo sapiens GN=DSC3 PE=1 SV=3	DSC3_HUMAN	DSC3	100 kDa	0.89	1.2	[]	0	0	0	0	26		0	26	#DIV/0!	0	16		16	#DIV/0!
1135	Exocyst complex component 3 OS=Homo sapiens GN=EXOC3 PE=1 SV=2	EXOC3_HUMAN	EXOC3	87 kDa	0.7	0.8	[]	0	0	0	0	15	10	1	26	#DIV/0!	12	4	4	20	#DIV/0!
1066	PERQ amino acid-rich with GYF domain-containing protein 2 OS=Homo sapiens GN=GIGYF2 PE=1 SV=1	PERQ2_HUMAN	PERQ2	150 kDa	0.67	1.9	[]	0	0	0	0	24	2	0	26	#DIV/0!	46	3	0	49	#DIV/0!
776	Ral GTPase-activating protein subunit alpha-1 OS=Homo sapiens GN=RALGAPA1 PE=1 SV=1	RGPA1_HUMAN	RGPA1	230 kDa	0.53	0.5	[]	0	0	0	0	19	7	0	26	#DIV/0!	12	0	0	12	#DIV/0!
1477	DnaJ homolog subfamily A member 1 OS=Homo sapiens GN=DNAJA1 PE=1 SV=2	DNJA1_HUMAN	DNJA1	45 kDa	0.89	1.2	[]	0	0		0	26			26	#DIV/0!	32		0	32	#DIV/0!
188	Probable 28S rRNA (cytosine(4447)-C(5))-methyltransferase OS=Homo sapiens GN=NOP2 PE=1 SV=2	NOP2_HUMAN	NOP2	89 kDa	0.32	0.1	[]	0	0		0	0	22	4	26	#DIV/0!	2	0	1	3	#DIV/0!
657	Protein deglycase DJ-1 OS=Homo sapiens GN=PARK7 PE=1 SV=2	PARK7_HUMAN	PARK7	20 kDa	0.48	3.6	[]	0		0	0	22	3	1	26	#DIV/0!	87	1	5	93	#DIV/0!
649	Abl interactor 1 OS=Homo sapiens GN=ABI1 PE=1 SV=4	ABI1_HUMAN	ABI1	55 kDa	0.48	0.8	[]	0			0	12	10	4	26	#DIV/0!	8	7	5	20	#DIV/0!
593	Dystrobrevin beta OS=Homo sapiens GN=DTNB PE=1 SV=1	DTNB_HUMAN	DTNB	71 kDa	0.45	0.2	[]	0			0	26	0		26	#DIV/0!	4	0	0	4	#DIV/0!
1240	Protein transport protein Sec24B OS=Homo sapiens GN=SEC24B PE=1 SV=2	SC24B_HUMAN	SC24B	137 kDa	0.76	1.3	[]	0			0	6	19	1	26	#DIV/0!	6	26	3	35	#DIV/0!
510	Polyadenylate-binding protein 1 OS=Homo sapiens GN=PABPC1 PE=1 SV=2	PABP1_HUMAN	PABP1	71 kDa	0.42	5.8	[]		0	0	0	16	8	2	26	#DIV/0!	142	1	7	150	#DIV/0!
1475	ADP-ribosylation factor GTPase-activating protein 3 OS=Homo sapiens GN=ARFGAP3 PE=1 SV=1	ARFG3_HUMAN	ARFG3	57 kDa	0.89	1.2	[]				0	5	21	0	26	#DIV/0!	4	23	3	30	#DIV/0!
1425	DnaJ homolog subfamily C member 1 OS=Homo sapiens GN=DNAJC1 PE=1 SV=1	DNJC1_HUMAN	DNJC1	64 kDa	0.86	1.2	[]				0	18	8		26	#DIV/0!	5	24	2	31	#DIV/0!
239	Sodium-dependent phosphate transporter 2 OS=Homo sapiens GN=SLC20A2 PE=1 SV=1	S20A2_HUMAN	S20A2	70 kDa	0.35	0.1	[]				0	23	3		26	#DIV/0!	0	3		3	#DIV/0!
136	Ubiquitin-associated protein 2-like OS=Homo sapiens GN=UBAP2L PE=1 SV=2	UBP2L_HUMAN	UBP2L	115 kDa	0.29	2	[]	0	0	0	0	2	23	2	27	#DIV/0!	14	19	21	54	#DIV/0!
839	Sprouty-related, EVH1 domain-containing protein 2 OS=Homo sapiens GN=SPRED2 PE=1 SV=2	SPRE2_HUMAN	SPRE2	48 kDa	0.56	0.3	[]	0	0		0	27	0	0	27	#DIV/0!	0	9	0	9	#DIV/0!
135	Interferon-induced protein with tetratricopeptide repeats 5 OS=Homo sapiens GN=IFIT5 PE=1 SV=1	IFIT5_HUMAN	IFIT5	56 kDa	0.29	0.04	[]	0		0	0	23	1	3	27	#DIV/0!	1			1	#DIV/0!
1028	Isoleucine--tRNA ligase, mitochondrial OS=Homo sapiens GN=IARS2 PE=1 SV=2	SYIM_HUMAN	SYIM	114 kDa	0.65	1.9	[]	0		0	0	2	2	23	27	#DIV/0!	45	0	5	50	#DIV/0!
742	Calcium-regulated heat stable protein 1 OS=Homo sapiens GN=CARHSP1 PE=1 SV=2	CHSP1_HUMAN	CHSP1	16 kDa	0.51	2.6	[]	0			0	17	9	1	27	#DIV/0!	61	6	2	69	#DIV/0!
1492	Isocitrate dehydrogenase [NADP], mitochondrial OS=Homo sapiens GN=IDH2 PE=1 SV=2	IDHP_HUMAN	IDHP	51 kDa	0.9	1.2	[]	0			0	6	0	21	27	#DIV/0!	32		0	32	#DIV/0!
1519	RNA-binding protein 14 OS=Homo sapiens GN=RBM14 PE=1 SV=2	RBM14_HUMAN	RBM14	69 kDa	0.91	0.9	[]	0			0	9	3	15	27	#DIV/0!	24			24	#DIV/0!
159	Signal transducer and activator of transcription 1-alpha/beta OS=Homo sapiens GN=STAT1 PE=1 SV=2	STAT1_HUMAN	STAT1	87 kDa	0.3	4.2	[]	0			0	8	11	8	27	#DIV/0!	86	10	17	113	#DIV/0!
223	Integrin beta-5 OS=Homo sapiens GN=ITGB5 PE=1 SV=1	ITB5_HUMAN	ITB5	88 kDa	0.34	0.4	[]		0	0	0	17	10	0	27	#DIV/0!	4	6	0	10	#DIV/0!
213	ER membrane protein complex subunit 7 OS=Homo sapiens GN=EMC7 PE=1 SV=1	EMC7_HUMAN	EMC7	26 kDa	0.34	2	[]				0	16	10	1	27	#DIV/0!	29	20	5	54	#DIV/0!
389	DENN domain-containing protein 4C OS=Homo sapiens GN=DENND4C PE=1 SV=2	DEN4C_HUMAN	DEN4C	187 kDa	0.38	0.07	[]	0	0	0	0	27	1	0	28	#DIV/0!	0	2	0	2	#DIV/0!
75	DNA topoisomerase 2-alpha OS=Homo sapiens GN=TOP2A PE=1 SV=3	TOP2A_HUMAN	TOP2A	174 kDa	0.19	0.2	[]	0	0	0	0	1	15	12	28	#DIV/0!	5	0	2	7	#DIV/0!
706	Leucine zipper putative tumor suppressor 2 OS=Homo sapiens GN=LZTS2 PE=1 SV=2	LZTS2_HUMAN	LZTS2	73 kDa	0.5	0.2	[]	0		0	0	28		0	28	#DIV/0!	5	2		7	#DIV/0!
636	Heterogeneous nuclear ribonucleoproteins A2/B1 OS=Homo sapiens GN=HNRNPA2B1 PE=1 SV=2	ROA2_HUMAN	ROA2	37 kDa	0.47	3.6	[]	0		0	0	22	5	1	28	#DIV/0!	80	5	4	89	#DIV/0!
1549	Succinyl-CoA ligase [ADP-forming] subunit beta, mitochondrial OS=Homo sapiens GN=SUCLA2 PE=1 SV=3	SUCB1_HUMAN	SUCB1	50 kDa	0.93	0.9	[]	0		0	0	0	2	26	28	#DIV/0!	23		2	25	#DIV/0!
921	Metal transporter CNNM3 OS=Homo sapiens GN=CNNM3 PE=1 SV=1	CNNM3_HUMAN	CNNM3	76 kDa	0.6	0.4	[]	0			0	27	1	0	28	#DIV/0!	11	1		12	#DIV/0!
1463	Phosducin-like protein OS=Homo sapiens GN=PDCL PE=1 SV=3	PHLP_HUMAN	PHLP	34 kDa	0.88	0.9	[]	0			0	23	4	1	28	#DIV/0!	7	17		24	#DIV/0!
1164	Nuclear pore membrane glycoprotein 210 OS=Homo sapiens GN=NUP210 PE=1 SV=3	PO210_HUMAN	PO210	205 kDa	0.72	1.5	[]	0			0	16	4	8	28	#DIV/0!	39	3	1	43	#DIV/0!
44	Stromal membrane-associated protein 1 OS=Homo sapiens GN=SMAP1 PE=1 SV=2	SMAP1_HUMAN	SMAP1	50 kDa	0.14	0.1	[]	0			0	17	9	2	28	#DIV/0!	0	3	1	4	#DIV/0!
1148	OCIA domain-containing protein 1 OS=Homo sapiens GN=OCIAD1 PE=1 SV=1	OCAD1_HUMAN	OCAD1	28 kDa	0.71	1.4	[]				0	3	16	9	28	#DIV/0!	2	27	9	38	#DIV/0!
825	40S ribosomal protein S5 OS=Homo sapiens GN=RPS5 PE=1 SV=4	RS5_HUMAN	RS5	23 kDa	0.56	2.4	[]				0	18	9	1	28	#DIV/0!	63	0	5	68	#DIV/0!
578	1-phosphatidylinositol 4,5-bisphosphate phosphodiesterase beta-1 OS=Homo sapiens GN=PLCB1 PE=1 SV=1	PLCB1_HUMAN	PLCB1	139 kDa	0.44	0.4	[]	0	0	0	0	6	22	1	29	#DIV/0!	0	10	1	11	#DIV/0!
1056	Tumor protein D53 OS=Homo sapiens GN=TPD52L1 PE=1 SV=1	TPD53_HUMAN	TPD53	22 kDa	0.67	0.5	[]	0	0	0	0	29	0	0	29	#DIV/0!	14	0		14	#DIV/0!
770	Probable ubiquitin carboxyl-terminal hydrolase FAF-X OS=Homo sapiens GN=USP9X PE=1 SV=3	USP9X_HUMAN	USP9X	292 kDa	0.53	3.1	[]	0	0	0	0	9	15	5	29	#DIV/0!	90	0	1	91	#DIV/0!
1545	Double-stranded RNA-specific adenosine deaminase OS=Homo sapiens GN=ADAR PE=1 SV=4	DSRAD_HUMAN	DSRAD	136 kDa	0.93	0.9	[]	0	0		0	0	17	12	29	#DIV/0!	18	0	9	27	#DIV/0!
994	UMP-CMP kinase OS=Homo sapiens GN=CMPK1 PE=1 SV=3	KCY_HUMAN	KCY	22 kDa	0.64	1.9	[]	0		0	0	14	14	1	29	#DIV/0!	53		3	56	#DIV/0!
272	Ras-related protein Rab-21 OS=Homo sapiens GN=RAB21 PE=1 SV=3	RAB21_HUMAN	RAB21	24 kDa	0.37	0.1	[]	0		0	0	26		3	29	#DIV/0!	1	3		4	#DIV/0!
1214	Transmembrane protein 87A OS=Homo sapiens GN=TMEM87A PE=1 SV=3	TM87A_HUMAN	TM87A	63 kDa	0.74	1.6	[]	0		0	0	12	17	0	29	#DIV/0!	0	46	0	46	#DIV/0!
1403	Drebrin-like protein OS=Homo sapiens GN=DBNL PE=1 SV=1	DBNL_HUMAN	DBNL	48 kDa	0.84	0.8	[]	0			0	23	6	0	29	#DIV/0!	15	8	1	24	#DIV/0!
1253	Protein MON2 homolog OS=Homo sapiens GN=MON2 PE=1 SV=3	MON2_HUMAN	MON2	190 kDa	0.76	1.6	[]	0			0	29	0	0	29	#DIV/0!	47			47	#DIV/0!
266	UBX domain-containing protein 6 OS=Homo sapiens GN=UBXN6 PE=1 SV=1	UBXN6_HUMAN	UBXN6	50 kDa	0.37	0.2	[]	0			0	24	3	2	29	#DIV/0!	2	4	1	7	#DIV/0!
414	Coatomer subunit gamma-1 OS=Homo sapiens GN=COPG1 PE=1 SV=1	COPG1_HUMAN	COPG1	98 kDa	0.39	5.3	[]		0		0	10	12	7	29	#DIV/0!	73		10	83	#DIV/0!
1057	Coilin OS=Homo sapiens GN=COIL PE=1 SV=1	COIL_HUMAN	COIL	63 kDa	0.67	0.5	[]			0	0	29			29	#DIV/0!	14			14	#DIV/0!
844	L-aminoadipate-semialdehyde dehydrogenase-phosphopantetheinyl transferase OS=Homo sapiens GN=AASDHPPT PE=1 SV=2	ADPPT_HUMAN	ADPPT	36 kDa	0.56	1.8	[]	0	0	0	0	10	17	3	30	#DIV/0!	41	0	13	54	#DIV/0!
79	Exosome component 10 OS=Homo sapiens GN=EXOSC10 PE=1 SV=2	EXOSX_HUMAN	EXOSX	101 kDa	0.2	0.1	[]	0	0	0	0	1	21	8	30	#DIV/0!	2	0	1	3	#DIV/0!
1239	Mitochondrial-processing peptidase subunit beta OS=Homo sapiens GN=PMPCB PE=1 SV=2	MPPB_HUMAN	MPPB	54 kDa	0.76	1.4	[]	0	0	0	0	16	6	8	30	#DIV/0!	37		5	42	#DIV/0!
1177	Dual specificity protein kinase TTK OS=Homo sapiens GN=TTK PE=1 SV=2	TTK_HUMAN	TTK	97 kDa	0.72	0.6	[]	0	0	0	0	30	0	0	30	#DIV/0!	11	7	0	18	#DIV/0!
1559	Cytoplasmic dynein 1 light intermediate chain 1 OS=Homo sapiens GN=DYNC1LI1 PE=1 SV=3	DC1L1_HUMAN	DC1L1	57 kDa	0.94	0.9	[]	0			0	28		2	30	#DIV/0!	25		2	27	#DIV/0!
1121	Retinol dehydrogenase 11 OS=Homo sapiens GN=RDH11 PE=1 SV=2	RDH11_HUMAN	RDH11	35 kDa	0.7	1.8	[]	0			0	29	1	0	30	#DIV/0!	51	0	3	54	#DIV/0!
721	Sorting nexin-5 OS=Homo sapiens GN=SNX5 PE=1 SV=1	SNX5_HUMAN	SNX5	47 kDa	0.51	0.4	[]		0	0	0	26	4	0	30	#DIV/0!	10	1	0	11	#DIV/0!
98	Mitochondrial 2-oxoglutarate/malate carrier protein OS=Homo sapiens GN=SLC25A11 PE=1 SV=3	M2OM_HUMAN	M2OM	34 kDa	0.23	0.4	[]			0	0	5	18	7	30	#DIV/0!	4		7	11	#DIV/0!
1080	Arpin OS=Homo sapiens GN=ARPIN PE=1 SV=1	ARPIN_HUMAN	ARPIN	25 kDa	0.68	0.5	[]				0	30	0	0	30	#DIV/0!	6		10	16	#DIV/0!
851	Destrin OS=Homo sapiens GN=DSTN PE=1 SV=3	DEST_HUMAN	DEST	19 kDa	0.57	2.9	[]				0	30			30	#DIV/0!	88		0	88	#DIV/0!
881	Ras-related protein Rab-23 OS=Homo sapiens GN=RAB23 PE=1 SV=1	RAB23_HUMAN	RAB23	27 kDa	0.58	0.5	[]				0	26	2	2	30	#DIV/0!		6	9	15	#DIV/0!
793	Heterogeneous nuclear ribonucleoprotein A0 OS=Homo sapiens GN=HNRNPA0 PE=1 SV=1	ROA0_HUMAN	ROA0	31 kDa	0.54	2.2	[]				0	17	13	0	30	#DIV/0!	56	2	9	67	#DIV/0!
91	Protein shisa-2 homolog OS=Homo sapiens GN=SHISA2 PE=1 SV=1	SHSA2_HUMAN	SHSA2	31 kDa	0.22	0.2	[]				0	19	11	0	30	#DIV/0!	2	1	3	6	#DIV/0!
1021	Developmentally-regulated GTP-binding protein 1 OS=Homo sapiens GN=DRG1 PE=1 SV=1	DRG1_HUMAN	DRG1	41 kDa	0.65	1.9	[]	0	0	0	0	20	11	0	31	#DIV/0!	56	2	1	59	#DIV/0!
845	Merlin OS=Homo sapiens GN=NF2 PE=1 SV=1	MERL_HUMAN	MERL	70 kDa	0.56	0.5	[]	0	0	0	0	25	5	1	31	#DIV/0!	6	10	0	16	#DIV/0!
484	Tyrosine-protein phosphatase non-receptor type 23 OS=Homo sapiens GN=PTPN23 PE=1 SV=1	PTN23_HUMAN	PTN23	179 kDa	0.42	0.1	[]	0	0	0	0	30	1	0	31	#DIV/0!	4	0		4	#DIV/0!
897	DnaJ homolog subfamily B member 1 OS=Homo sapiens GN=DNAJB1 PE=1 SV=4	DNJB1_HUMAN	DNJB1	38 kDa	0.59	2.4	[]	0	0		0	18	13	0	31	#DIV/0!	73	1		74	#DIV/0!
1510	Phosphatidylinositol 4-phosphate 5-kinase type-1 alpha OS=Homo sapiens GN=PIP5K1A PE=1 SV=1	PI51A_HUMAN	PI51A	63 kDa	0.91	0.9	[]	0	0		0	23	6	2	31	#DIV/0!	17	11	0	28	#DIV/0!
1660	Switch-associated protein 70 OS=Homo sapiens GN=SWAP70 PE=1 SV=1	SWP70_HUMAN	SWP70	69 kDa	1	1	[]	0	0		0	14	17	0	31	#DIV/0!	15	15	1	31	#DIV/0!
1312	Aminoacyl tRNA synthase complex-interacting multifunctional protein 2 OS=Homo sapiens GN=AIMP2 PE=1 SV=2	AIMP2_HUMAN	AIMP2	35 kDa	0.79	1.4	[]	0			0	19	8	4	31	#DIV/0!	38		4	42	#DIV/0!
1059	Cleft lip and palate transmembrane protein 1-like protein OS=Homo sapiens GN=CLPTM1L PE=1 SV=1	CLP1L_HUMAN	CLP1L	62 kDa	0.67	0.7	[]	0			0	18	12	1	31	#DIV/0!	13	7	3	23	#DIV/0!
821	Peptidyl-prolyl cis-trans isomerase FKBP4 OS=Homo sapiens GN=FKBP4 PE=1 SV=3	FKBP4_HUMAN	FKBP4	52 kDa	0.55	0.4	[]	0			0	28	3	0	31	#DIV/0!	12	0	0	12	#DIV/0!
54	Leucyl-cystinyl aminopeptidase OS=Homo sapiens GN=LNPEP PE=1 SV=3	LCAP_HUMAN	LCAP	117 kDa	0.16	0.03	[]	0			0	20	11	0	31	#DIV/0!	0	1		1	#DIV/0!
1486	Protocadherin-7 OS=Homo sapiens GN=PCDH7 PE=1 SV=2	PCDH7_HUMAN	PCDH7	116 kDa	0.9	0.9	[]	0			0	16	5	10	31	#DIV/0!	0	27	0	27	#DIV/0!
1077	Syntaxin-8 OS=Homo sapiens GN=STX8 PE=1 SV=2	STX8_HUMAN	STX8	27 kDa	0.68	1.7	[]	0			0	4	22	5	31	#DIV/0!	0	50	4	54	#DIV/0!
1578	Nucleoside diphosphate kinase B OS=Homo sapiens GN=NME2 PE=1 SV=1	NDKB_HUMAN	NDKB	17 kDa	0.95	1.1	[]		0		0	31		0	31	#DIV/0!	34			34	#DIV/0!
1115	40S ribosomal protein S12 OS=Homo sapiens GN=RPS12 PE=1 SV=3	RS12_HUMAN	RS12	15 kDa	0.69	1.9	[]				0	31			31	#DIV/0!	60			60	#DIV/0!
968	Tubulin--tyrosine ligase-like protein 12 OS=Homo sapiens GN=TTLL12 PE=1 SV=2	TTL12_HUMAN	TTL12	74 kDa	0.63	1.8	[]				0	11	13	7	31	#DIV/0!	50	0	6	56	#DIV/0!
890	Inositol 1,4,5-trisphosphate receptor type 3 OS=Homo sapiens GN=ITPR3 PE=1 SV=2	ITPR3_HUMAN	ITPR3	304 kDa	0.59	0.4	[]	0	0	0	0	32	0	0	32	#DIV/0!	12	0	0	12	#DIV/0!
88	Receptor-type tyrosine-protein phosphatase gamma OS=Homo sapiens GN=PTPRG PE=1 SV=4	PTPRG_HUMAN	PTPRG	162 kDa	0.22	0.2	[]	0	0	0	0	8	20	4	32	#DIV/0!	0	8	0	8	#DIV/0!
1231	Glycogen phosphorylase, liver form OS=Homo sapiens GN=PYGL PE=1 SV=4	PYGL_HUMAN	PYGL	97 kDa	0.75	1.3	[]	0	0	0	0	8	16	8	32	#DIV/0!	35	1	7	43	#DIV/0!
1289	Spermine synthase OS=Homo sapiens GN=SMS PE=1 SV=2	SPSY_HUMAN	SPSY	41 kDa	0.77	1.5	[]	0	0	0	0	21	11	0	32	#DIV/0!	46	0	1	47	#DIV/0!
448	Ubiquitin carboxyl-terminal hydrolase 8 OS=Homo sapiens GN=USP8 PE=1 SV=1	UBP8_HUMAN	UBP8	128 kDa	0.4	0.06	[]	0	0	0	0	32	0	0	32	#DIV/0!	2	0	0	2	#DIV/0!
1398	Serine/threonine-protein kinase TAO3 OS=Homo sapiens GN=TAOK3 PE=1 SV=2	TAOK3_HUMAN	TAOK3	105 kDa	0.84	1.2	[]	0	0		0	13	11	8	32	#DIV/0!	4	31	3	38	#DIV/0!
1230	Tyrosine--tRNA ligase, cytoplasmic OS=Homo sapiens GN=YARS PE=1 SV=4	SYYC_HUMAN	SYYC	59 kDa	0.75	1.4	[]	0		0	0	24	5	3	32	#DIV/0!	39		7	46	#DIV/0!
1118	Matrix-remodeling-associated protein 7 OS=Homo sapiens GN=MXRA7 PE=1 SV=1	MXRA7_HUMAN	MXRA7	21 kDa	0.69	0.7	[]	0			0	21	11	0	32	#DIV/0!	15	4	4	23	#DIV/0!
903	Nuclear pore complex protein Nup214 OS=Homo sapiens GN=NUP214 PE=1 SV=2	NU214_HUMAN	NU214	214 kDa	0.6	2	[]	0			0	17	15	0	32	#DIV/0!	55	0	8	63	#DIV/0!
573	26S proteasome non-ATPase regulatory subunit 2 OS=Homo sapiens GN=PSMD2 PE=1 SV=3	PSMD2_HUMAN	PSMD2	100 kDa	0.44	3.7	[]	0	0	0	0	13	11	9	33	#DIV/0!	110		12	122	#DIV/0!
891	Prostaglandin E synthase 3 OS=Homo sapiens GN=PTGES3 PE=1 SV=1	TEBP_HUMAN	TEBP	19 kDa	0.59	2.7	[]	0		0	0	33	0	0	33	#DIV/0!	88			88	#DIV/0!
1533	Aladin OS=Homo sapiens GN=AAAS PE=1 SV=1	AAAS_HUMAN	AAAS	60 kDa	0.93	0.9	[]	0			0	26	3	4	33	#DIV/0!	23	1	6	30	#DIV/0!
1623	Monoacylglycerol lipase ABHD12 OS=Homo sapiens GN=ABHD12 PE=1 SV=2	ABD12_HUMAN	ABD12	45 kDa	0.98	1	[]	0			0	29	1	3	33	#DIV/0!	9	23	0	32	#DIV/0!
1319	Insulin receptor substrate 2 OS=Homo sapiens GN=IRS2 PE=1 SV=2	IRS2_HUMAN	IRS2	137 kDa	0.79	0.7	[]	0			0	27	4	2	33	#DIV/0!	22		2	24	#DIV/0!
377	Syntaxin-10 OS=Homo sapiens GN=STX10 PE=1 SV=1	STX10_HUMAN	STX10	28 kDa	0.38	0.5	[]	0			0	16	15	2	33	#DIV/0!	5	11	1	17	#DIV/0!
541	Rho-related GTP-binding protein RhoU OS=Homo sapiens GN=RHOU PE=1 SV=1	RHOU_HUMAN	RHOU	28 kDa	0.43	0.3	[]		0	0	0	27	6	0	33	#DIV/0!	6	5		11	#DIV/0!
1256	Sorting nexin-11 OS=Homo sapiens GN=SNX11 PE=1 SV=2	SNX11_HUMAN	SNX11	30 kDa	0.76	0.8	[]		0	0	0	22	11	0	33	#DIV/0!	13	11	2	26	#DIV/0!
1046	Sushi domain-containing protein 5 OS=Homo sapiens GN=SUSD5 PE=1 SV=3	SUSD5_HUMAN	SUSD5	68 kDa	0.66	0.6	[]			0	0	4	25	4	33	#DIV/0!	0	16	5	21	#DIV/0!
1460	Phospholipid scramblase 3 OS=Homo sapiens GN=PLSCR3 PE=1 SV=2	PLS3_HUMAN	PLS3	32 kDa	0.88	0.9	[]				0	20	13		33	#DIV/0!	11	13	6	30	#DIV/0!
663	Transmembrane protein 120B OS=Homo sapiens GN=TMEM120B PE=1 SV=1	T120B_HUMAN	T120B	40 kDa	0.48	0.2	[]				0	33	0		33	#DIV/0!	0	7		7	#DIV/0!
137	Integrin alpha-6 OS=Homo sapiens GN=ITGA6 PE=1 SV=5	ITA6_HUMAN	ITA6	127 kDa	0.29	0.5	[]	0	0	0	0	16	11	7	34	#DIV/0!	6	12	0	18	#DIV/0!
940	Transient receptor potential cation channel subfamily M member 7 OS=Homo sapiens GN=TRPM7 PE=1 SV=1	TRPM7_HUMAN	TRPM7	213 kDa	0.61	0.6	[]	0	0	0	0	19	14	1	34	#DIV/0!	1	17	4	22	#DIV/0!
959	E3 ubiquitin-protein ligase UBR4 OS=Homo sapiens GN=UBR4 PE=1 SV=1	UBR4_HUMAN	UBR4	574 kDa	0.62	2.3	[]	0	0	0	0	31	2	1	34	#DIV/0!	77	0	1	78	#DIV/0!
711	A-kinase anchor protein 13 OS=Homo sapiens GN=AKAP13 PE=1 SV=2	AKP13_HUMAN	AKP13	308 kDa	0.5	0.4	[]	0	0		0	31	3	0	34	#DIV/0!	6	4	2	12	#DIV/0!
1446	Stathmin OS=Homo sapiens GN=STMN1 PE=1 SV=3	STMN1_HUMAN	STMN1	17 kDa	0.87	1.3	[]	0			0	34		0	34	#DIV/0!	41	1	1	43	#DIV/0!
415	Calreticulin OS=Homo sapiens GN=CALR PE=1 SV=1	CALR_HUMAN	CALR	48 kDa	0.4	4.1	[]				0	32	2	0	34	#DIV/0!	119	13	9	141	#DIV/0!
1036	Cancer-related nucleoside-triphosphatase OS=Homo sapiens GN=NTPCR PE=1 SV=1	NTPCR_HUMAN	NTPCR	21 kDa	0.66	1.9	[]				0	27	6	1	34	#DIV/0!	60		4	64	#DIV/0!
399	Transmembrane protein 106B OS=Homo sapiens GN=TMEM106B PE=1 SV=2	T106B_HUMAN	T106B	31 kDa	0.39	0.03	[]				0	34			34	#DIV/0!	1			1	#DIV/0!
1448	Ribosome biogenesis protein BRX1 homolog OS=Homo sapiens GN=BRIX1 PE=1 SV=2	BRX1_HUMAN	BRX1	41 kDa	0.87	1.2	[]	0	0	0	0	0	25	10	35	#DIV/0!	31	0	10	41	#DIV/0!
871	Coiled-coil domain-containing protein 124 OS=Homo sapiens GN=CCDC124 PE=1 SV=1	CC124_HUMAN	CC124	26 kDa	0.58	0.6	[]	0	0	0	0	24	11		35	#DIV/0!	3	16	1	20	#DIV/0!
1176	Erlin-1 OS=Homo sapiens GN=ERLIN1 PE=1 SV=1	ERLN1_HUMAN	ERLN1	39 kDa	0.72	0.7	[]	0	0		0	22	8	5	35	#DIV/0!	24	0		24	#DIV/0!
146	Dyslexia-associated protein KIAA0319-like protein OS=Homo sapiens GN=KIAA0319L PE=1 SV=2	K319L_HUMAN	K319L	116 kDa	0.29	0.3	[]	0	0		0	14	20	1	35	#DIV/0!	1	10	1	12	#DIV/0!
275	Abelson tyrosine-protein kinase 2 OS=Homo sapiens GN=ABL2 PE=1 SV=1	ABL2_HUMAN	ABL2	128 kDa	0.37	0.3	[]	0		0	0	27	6	2	35	#DIV/0!	6	5	0	11	#DIV/0!
1236	Protein disulfide-isomerase A4 OS=Homo sapiens GN=PDIA4 PE=1 SV=2	PDIA4_HUMAN	PDIA4	73 kDa	0.75	0.7	[]	0		0	0	24	7	4	35	#DIV/0!	19	5	0	24	#DIV/0!
198	Uncharacterized protein C1orf198 OS=Homo sapiens GN=C1orf198 PE=1 SV=1	CA198_HUMAN	CA198	36 kDa	0.33	0.2	[]	0			0	28	7	0	35	#DIV/0!	0	6		6	#DIV/0!
33	Tight junction-associated protein 1 OS=Homo sapiens GN=TJAP1 PE=1 SV=1	TJAP1_HUMAN	TJAP1	62 kDa	0.12	0	[]	0			0	20	15	0	35	#DIV/0!	0	0		0	#DIV/0!
986	Chloride intracellular channel protein 1 OS=Homo sapiens GN=CLIC1 PE=1 SV=4	CLIC1_HUMAN	CLIC1	27 kDa	0.64	1.7	[]		0		0	22	13	0	35	#DIV/0!	48	3	8	59	#DIV/0!
996	Ras-related protein Rab-18 OS=Homo sapiens GN=RAB18 PE=1 SV=1	RAB18_HUMAN	RAB18	23 kDa	0.64	1.8	[]		0		0	24	5	6	35	#DIV/0!	54	5	3	62	#DIV/0!
918	Syntaxin-12 OS=Homo sapiens GN=STX12 PE=1 SV=1	STX12_HUMAN	STX12	32 kDa	0.6	0.7	[]		0		0	17	18	0	35	#DIV/0!	13	8	3	24	#DIV/0!
1022	Very-long-chain 3-oxoacyl-CoA reductase OS=Homo sapiens GN=HSD17B12 PE=1 SV=2	DHB12_HUMAN	DHB12	34 kDa	0.65	1.7	[]	0	0	0	0	28	8	0	36	#DIV/0!	52	6	4	62	#DIV/0!
1114	Glutaminase kidney isoform, mitochondrial OS=Homo sapiens GN=GLS PE=1 SV=1	GLSK_HUMAN	GLSK	73 kDa	0.69	0.6	[]	0	0	0	0	4	7	25	36	#DIV/0!	23	0	0	23	#DIV/0!
1266	Segment polarity protein dishevelled homolog DVL-2 OS=Homo sapiens GN=DVL2 PE=1 SV=1	DVL2_HUMAN	DVL2	79 kDa	0.77	0.6	[]	0		0	0	35	1	0	36	#DIV/0!	22	1	0	23	#DIV/0!
911	Growth factor receptor-bound protein 2 OS=Homo sapiens GN=GRB2 PE=1 SV=1	GRB2_HUMAN	GRB2	25 kDa	0.6	0.4	[]	0			0	36	0	0	36	#DIV/0!	14			14	#DIV/0!
582	Probable palmitoyltransferase ZDHHC20 OS=Homo sapiens GN=ZDHHC20 PE=1 SV=1	ZDH20_HUMAN	ZDH20	42 kDa	0.45	0.4	[]	0			0	11	25	0	36	#DIV/0!	0	13	2	15	#DIV/0!
1097	Calcyclin-binding protein OS=Homo sapiens GN=CACYBP PE=1 SV=2	CYBP_HUMAN	CYBP	26 kDa	0.68	1.7	[]				0	33	0	3	36	#DIV/0!	51	0	10	61	#DIV/0!
1152	Pericentriolar material 1 protein OS=Homo sapiens GN=PCM1 PE=1 SV=4	PCM1_HUMAN	PCM1	229 kDa	0.71	1.8	[]	0	0	0	0	37	0	0	37	#DIV/0!	66	0	1	67	#DIV/0!
1234	Testin OS=Homo sapiens GN=TES PE=1 SV=1	TES_HUMAN	TES	48 kDa	0.75	0.7	[]	0	0	0	0	29	4	4	37	#DIV/0!	19	7	1	27	#DIV/0!
1300	Myosin light polypeptide 6 OS=Homo sapiens GN=MYL6 PE=1 SV=2	MYL6_HUMAN	MYL6	17 kDa	0.78	1.5	[]	0			0	37			37	#DIV/0!	57			57	#DIV/0!
70	26S proteasome non-ATPase regulatory subunit 4 OS=Homo sapiens GN=PSMD4 PE=1 SV=1	PSMD4_HUMAN	PSMD4	41 kDa	0.19	0.4	[]	0			0	14	16	7	37	#DIV/0!	5	9	1	15	#DIV/0!
520	Zinc finger FYVE domain-containing protein 9 OS=Homo sapiens GN=ZFYVE9 PE=1 SV=2	ZFYV9_HUMAN	ZFYV9	156 kDa	0.42	0.3	[]	0			0	32	3	2	37	#DIV/0!	8	2		10	#DIV/0!
444	SH2 domain-containing protein 4A OS=Homo sapiens GN=SH2D4A PE=1 SV=1	SH24A_HUMAN	SH24A	53 kDa	0.4	0.4	[]		0		0	23	14	0	37	#DIV/0!	2	13	0	15	#DIV/0!
1542	UPF0428 protein CXorf56 OS=Homo sapiens GN=CXorf56 PE=1 SV=1	CX056_HUMAN	CX056	26 kDa	0.93	0.9	[]				0	25	9	3	37	#DIV/0!	15	14	6	35	#DIV/0!
433	Tyrosine-protein phosphatase non-receptor type 13 OS=Homo sapiens GN=PTPN13 PE=1 SV=2	PTN13_HUMAN	PTN13	277 kDa	0.4	0.4	[]	0	0	0	0	26	8	4	38	#DIV/0!	1	14	0	15	#DIV/0!
763	C2 domain-containing protein 2-like OS=Homo sapiens GN=C2CD2L PE=1 SV=3	C2C2L_HUMAN	C2C2L	76 kDa	0.53	0.3	[]	0		0	0	35	2	1	38	#DIV/0!	13			13	#DIV/0!
1137	Protein CDV3 homolog OS=Homo sapiens GN=CDV3 PE=1 SV=1	CDV3_HUMAN	CDV3	27 kDa	0.7	0.7	[]	0			0	27	10	1	38	#DIV/0!	18	7	2	27	#DIV/0!
1628	Segment polarity protein dishevelled homolog DVL-3 OS=Homo sapiens GN=DVL3 PE=1 SV=2	DVL3_HUMAN	DVL3	78 kDa	0.98	1	[]	0			0	38			38	#DIV/0!	13	20		33	#DIV/0!
1166	Glycerol-3-phosphate acyltransferase 4 OS=Homo sapiens GN=AGPAT6 PE=1 SV=1	GPAT4_HUMAN	GPAT4	52 kDa	0.72	1.4	[]	0			0	6	26	6	38	#DIV/0!	12	39	2	53	#DIV/0!
659	Beta-2-syntrophin OS=Homo sapiens GN=SNTB2 PE=1 SV=1	SNTB2_HUMAN	SNTB2	58 kDa	0.48	0.3	[]	0			0	35	2	1	38	#DIV/0!	10		1	11	#DIV/0!
1168	26S protease regulatory subunit 8 OS=Homo sapiens GN=PSMC5 PE=1 SV=1	PRS8_HUMAN	PRS8	46 kDa	0.72	1.5	[]				0	23	5	10	38	#DIV/0!	52	1	8	61	#DIV/0!
1369	Ras-related protein Rab-22A OS=Homo sapiens GN=RAB22A PE=1 SV=2	RB22A_HUMAN	RB22A	22 kDa	0.82	0.8	[]				0	27	9	2	38	#DIV/0!	20	9	0	29	#DIV/0!
176	Dystroglycan OS=Homo sapiens GN=DAG1 PE=1 SV=2	DAG1_HUMAN	DAG1	97 kDa	0.31	0.4	[]	0	0	0	0	9	23	7	39	#DIV/0!	0	14	2	16	#DIV/0!
1452	Gem-associated protein 5 OS=Homo sapiens GN=GEMIN5 PE=1 SV=3	GEMI5_HUMAN	GEMI5	169 kDa	0.87	1.2	[]	0	0	0	0	8	28	3	39	#DIV/0!	48	0	0	48	#DIV/0!
1340	WD repeat-containing protein 41 OS=Homo sapiens GN=WDR41 PE=2 SV=3	WDR41_HUMAN	WDR41	52 kDa	0.8	0.7	[]	0	0	0	0	39	0	0	39	#DIV/0!	13	15	0	28	#DIV/0!
1027	Eukaryotic peptide chain release factor GTP-binding subunit ERF3A OS=Homo sapiens GN=GSPT1 PE=1 SV=1	ERF3A_HUMAN	ERF3A	56 kDa	0.65	1.8	[]	0	0		0	21	15	3	39	#DIV/0!	63	3	3	69	#DIV/0!
1488	cAMP-dependent protein kinase type II-alpha regulatory subunit OS=Homo sapiens GN=PRKAR2A PE=1 SV=2	KAP2_HUMAN	KAP2	46 kDa	0.9	0.8	[]	0	0		0	39	0	0	39	#DIV/0!	32	0		32	#DIV/0!
1508	Rab3 GTPase-activating protein non-catalytic subunit OS=Homo sapiens GN=RAB3GAP2 PE=1 SV=1	RBGPR_HUMAN	RBGPR	156 kDa	0.91	0.9	[]	0		0	0	11	22	6	39	#DIV/0!	31	1	3	35	#DIV/0!
1278	Protein phosphatase methylesterase 1 OS=Homo sapiens GN=PPME1 PE=1 SV=3	PPME1_HUMAN	PPME1	42 kDa	0.77	1.3	[]	0			0	2	15	22	39	#DIV/0!	37	6	7	50	#DIV/0!
568	Transforming acidic coiled-coil-containing protein 1 OS=Homo sapiens GN=TACC1 PE=1 SV=2	TACC1_HUMAN	TACC1	88 kDa	0.44	0.5	[]	0			0	23	14	2	39	#DIV/0!	2	16	2	20	#DIV/0!
1272	Calponin-2 OS=Homo sapiens GN=CNN2 PE=1 SV=4	CNN2_HUMAN	CNN2	34 kDa	0.77	1.1	[]				0	15	16	8	39	#DIV/0!	19	12	11	42	#DIV/0!
381	Wiskott-Aldrich syndrome protein family member 2 OS=Homo sapiens GN=WASF2 PE=1 SV=3	WASF2_HUMAN	WASF2	54 kDa	0.38	0.5	[]				0	23	13	3	39	#DIV/0!	5	13	1	19	#DIV/0!
967	Disks large homolog 5 OS=Homo sapiens GN=DLG5 PE=1 SV=4	DLG5_HUMAN	DLG5	214 kDa	0.62	0.4	[]	0	0	0	0	40	0	0	40	#DIV/0!	17	0	0	17	#DIV/0!
1320	DNA mismatch repair protein Msh2 OS=Homo sapiens GN=MSH2 PE=1 SV=1	MSH2_HUMAN	MSH2	105 kDa	0.79	1.3	[]	0	0	0	0	5	19	16	40	#DIV/0!	41		10	51	#DIV/0!
1522	SWI/SNF-related matrix-associated actin-dependent regulator of chromatin subfamily A member 5 OS=Homo sapiens GN=SMARCA5 PE=1 SV=1	SMCA5_HUMAN	SMCA5	122 kDa	0.92	1.1	[]	0	0	0	0	4	21	15	40	#DIV/0!	36	1	7	44	#DIV/0!
1189	Protein EFR3 homolog A OS=Homo sapiens GN=EFR3A PE=1 SV=2	EFR3A_HUMAN	EFR3A	93 kDa	0.73	1.5	[]	0	0		0	26	8	6	40	#DIV/0!	4	51	4	59	#DIV/0!
1427	Starch-binding domain-containing protein 1 OS=Homo sapiens GN=STBD1 PE=1 SV=1	STBD1_HUMAN	STBD1	39 kDa	0.86	1.1	[]			0	0	23	15	2	40	#DIV/0!	11	32	3	46	#DIV/0!
1162	Methylosome subunit pICln OS=Homo sapiens GN=CLNS1A PE=1 SV=1	ICLN_HUMAN	ICLN	26 kDa	0.72	0.6	[]				0	34	6		40	#DIV/0!	23		2	25	#DIV/0!
786	MICAL-like protein 1 OS=Homo sapiens GN=MICALL1 PE=1 SV=2	MILK1_HUMAN	MILK1	93 kDa	0.54	0.5	[]				0	30	10	0	40	#DIV/0!	12	8	1	21	#DIV/0!
89	BAG family molecular chaperone regulator 3 OS=Homo sapiens GN=BAG3 PE=1 SV=3	BAG3_HUMAN	BAG3	62 kDa	0.22	3	[]	0	0	0	0	28	11	2	41	#DIV/0!	76	27	21	124	#DIV/0!
654	Oxysterol-binding protein-related protein 10 OS=Homo sapiens GN=OSBPL10 PE=1 SV=2	OSB10_HUMAN	OSB10	84 kDa	0.48	0.4	[]	0	0	0	0	32	7	2	41	#DIV/0!	15		1	16	#DIV/0!
1424	ELKS/Rab6-interacting/CAST family member 1 OS=Homo sapiens GN=ERC1 PE=1 SV=1	RB6I2_HUMAN	RB6I2	128 kDa	0.86	0.8	[]	0	0	0	0	36	2	3	41	#DIV/0!	32	0	0	32	#DIV/0!
1181	Septin-11 OS=Homo sapiens GN=SEPT11 PE=1 SV=3	SEP11_HUMAN	2019-09-11	49 kDa	0.72	0.7	[]	0	0	0	0	8	25	8	41	#DIV/0!	0	26	0	26	#DIV/0!
314	Protein naked cuticle homolog 2 OS=Homo sapiens GN=NKD2 PE=1 SV=1	NKD2_HUMAN	NKD2	50 kDa	0.37	0	[]	0		0	0	41		0	41	#DIV/0!	0	0		0	#DIV/0!
1387	AP-3 complex subunit delta-1 OS=Homo sapiens GN=AP3D1 PE=1 SV=1	AP3D1_HUMAN	AP3D1	130 kDa	0.84	0.8	[]	0			0	29	12	0	41	#DIV/0!	32	0	0	32	#DIV/0!
1586	Guanine nucleotide-binding protein subunit alpha-11 OS=Homo sapiens GN=GNA11 PE=1 SV=2	GNA11_HUMAN	GNA11	42 kDa	0.96	0.9	[]	0			0	38	3	0	41	#DIV/0!	37		1	38	#DIV/0!
221	Liprin-beta-2 OS=Homo sapiens GN=PPFIBP2 PE=1 SV=3	LIPB2_HUMAN	LIPB2	99 kDa	0.34	0.2	[]	0			0	25	6	10	41	#DIV/0!	2	7		9	#DIV/0!
540	Valine--tRNA ligase OS=Homo sapiens GN=VARS PE=1 SV=4	SYVC_HUMAN	SYVC	140 kDa	0.43	3.6	[]	0			0	7	16	18	41	#DIV/0!	130		18	148	#DIV/0!
631	Charged multivesicular body protein 5 OS=Homo sapiens GN=CHMP5 PE=1 SV=1	CHMP5_HUMAN	CHMP5	25 kDa	0.47	0.7	[]		0		0	20	15	6	41	#DIV/0!	12	12	6	30	#DIV/0!
857	Thymidylate kinase OS=Homo sapiens GN=DTYMK PE=1 SV=4	KTHY_HUMAN	KTHY	24 kDa	0.57	2.7	[]				0	40	1	0	41	#DIV/0!	107	0	3	110	#DIV/0!
1045	Sorting nexin-12 OS=Homo sapiens GN=SNX12 PE=1 SV=3	SNX12_HUMAN	SNX12	20 kDa	0.66	0.5	[]				0	41			41	#DIV/0!	19			19	#DIV/0!
591	Formin-binding protein 1 OS=Homo sapiens GN=FNBP1 PE=1 SV=2	FNBP1_HUMAN	FNBP1	71 kDa	0.45	0.4	[]	0	0	0	0	34	8	0	42	#DIV/0!	11	4	0	15	#DIV/0!
643	Sequestosome-1 OS=Homo sapiens GN=SQSTM1 PE=1 SV=1	SQSTM_HUMAN	SQSTM	48 kDa	0.48	0.4	[]	0			0	35	3	4	42	#DIV/0!	12	3	1	16	#DIV/0!
125	TBC1 domain family member 10B OS=Homo sapiens GN=TBC1D10B PE=1 SV=3	TB10B_HUMAN	TB10B	87 kDa	0.27	0.1	[]	0			0	33	9		42	#DIV/0!	4	0		4	#DIV/0!
1580	Ribose-phosphate pyrophosphokinase 1 OS=Homo sapiens GN=PRPS1 PE=1 SV=2	PRPS1_HUMAN	PRPS1	35 kDa	0.95	1	[]		0	0	0	13	19	10	42	#DIV/0!	34		9	43	#DIV/0!
1184	Leucine-rich repeat-containing protein 57 OS=Homo sapiens GN=LRRC57 PE=1 SV=1	LRC57_HUMAN	LRC57	27 kDa	0.72	0.6	[]				0	41	1	0	42	#DIV/0!	15	10	1	26	#DIV/0!
1093	FAS-associated factor 2 OS=Homo sapiens GN=FAF2 PE=1 SV=2	FAF2_HUMAN	FAF2	53 kDa	0.68	1.7	[]	0	0	0	0	35	1	7	43	#DIV/0!	64	5	4	73	#DIV/0!
2	Guanine nucleotide-binding protein-like 3 OS=Homo sapiens GN=GNL3 PE=1 SV=2	GNL3_HUMAN	GNL3	62 kDa	0.021	0.2	CD63+LMP1 low, CD63_CT high	0	0	0	0	14	13	16	43	#DIV/0!	9	0	1	10	#DIV/0!
1073	Ribosomal protein S6 kinase alpha-3 OS=Homo sapiens GN=RPS6KA3 PE=1 SV=1	KS6A3_HUMAN	KS6A3	84 kDa	0.68	1.8	[]	0	0	0	0	22	9	12	43	#DIV/0!	73	0	2	75	#DIV/0!
620	Alanine--tRNA ligase, cytoplasmic OS=Homo sapiens GN=AARS PE=1 SV=2	SYAC_HUMAN	SYAC	107 kDa	0.46	3.8	[]	0	0	0	0	23	18	2	43	#DIV/0!	151	0	12	163	#DIV/0!
259	Protein SGT1 homolog OS=Homo sapiens GN=SUGT1 PE=1 SV=3	SGT1_HUMAN	SGT1	41 kDa	0.36	1.7	[]	0	0		0	18	19	6	43	#DIV/0!	41	26	8	75	#DIV/0!
806	Guanine nucleotide-binding protein G(I)/G(S)/G(T) subunit beta-2 OS=Homo sapiens GN=GNB2 PE=1 SV=3	GBB2_HUMAN	GBB2	37 kDa	0.54	0.7	[]	0		0	0	23	15	5	43	#DIV/0!	19	0	9	28	#DIV/0!
975	Phosphoribosyl pyrophosphate synthase-associated protein 2 OS=Homo sapiens GN=PRPSAP2 PE=1 SV=1	KPRB_HUMAN	KPRB	41 kDa	0.63	1.5	[]	0	0	0	0	12	26	6	44	#DIV/0!	50	15	3	68	#DIV/0!
566	SEC23-interacting protein OS=Homo sapiens GN=SEC23IP PE=1 SV=1	S23IP_HUMAN	S23IP	111 kDa	0.44	1.4	[]	0	0	0	0	15	20	9	44	#DIV/0!	30	25	8	63	#DIV/0!
460	Eukaryotic translation initiation factor 4 gamma 2 OS=Homo sapiens GN=EIF4G2 PE=1 SV=1	IF4G2_HUMAN	IF4G2	102 kDa	0.41	3.5	[]	0		0	0	40	3	1	44	#DIV/0!	125	10	18	153	#DIV/0!
767	Cyclin-dependent-like kinase 5 OS=Homo sapiens GN=CDK5 PE=1 SV=3	CDK5_HUMAN	CDK5	33 kDa	0.53	2.5	[]	0			0	31	13		44	#DIV/0!	37		13	50	#DIV/0!
1041	Transforming protein RhoA OS=Homo sapiens GN=RHOA PE=1 SV=1	RHOA_HUMAN	RHOA	22 kDa	0.66	2	[]	0			0	39	5	0	44	#DIV/0!	82	0	4	86	#DIV/0!
664	TBC1 domain family member 5 OS=Homo sapiens GN=TBC1D5 PE=1 SV=1	TBCD5_HUMAN	TBCD5	89 kDa	0.49	0.4	[]	0			0	37	7		44	#DIV/0!	11	5	1	17	#DIV/0!
916	UBX domain-containing protein 1 OS=Homo sapiens GN=UBXN1 PE=1 SV=2	UBXN1_HUMAN	UBXN1	33 kDa	0.6	2.2	[]	0			0	41	3	0	44	#DIV/0!	92	0	7	99	#DIV/0!
623	Tyrosine-protein phosphatase non-receptor type 11 OS=Homo sapiens GN=PTPN11 PE=1 SV=2	PTN11_HUMAN	PTN11	68 kDa	0.46	0.5	[]	0	0	0	0	28	14	3	45	#DIV/0!	16	8		24	#DIV/0!
157	Arf-GAP with GTPase, ANK repeat and PH domain-containing protein 1 OS=Homo sapiens GN=AGAP1 PE=1 SV=4	AGAP1_HUMAN	AGAP1	94 kDa	0.3	0.3	[]	0		0	0	32	12	1	45	#DIV/0!	2	8	2	12	#DIV/0!
984	NADH-cytochrome b5 reductase 3 OS=Homo sapiens GN=CYB5R3 PE=1 SV=3	NB5R3_HUMAN	NB5R3	34 kDa	0.63	1.9	[]			0	0	36	8	1	45	#DIV/0!	79	8	0	87	#DIV/0!
935	Tubulin-folding cofactor B OS=Homo sapiens GN=TBCB PE=1 SV=2	TBCB_HUMAN	TBCB	27 kDa	0.61	1.8	[]			0	0	34	9	2	45	#DIV/0!	64	9	7	80	#DIV/0!
1530	Calcineurin B homologous protein 1 OS=Homo sapiens GN=CHP1 PE=1 SV=3	CHP1_HUMAN	CHP1	22 kDa	0.92	0.9	[]				0	39	6	0	45	#DIV/0!	35	5	0	40	#DIV/0!
544	Amyloid beta A4 precursor protein-binding family B member 1 OS=Homo sapiens GN=APBB1 PE=1 SV=2	APBB1_HUMAN	APBB1	77 kDa	0.43	0.3	[]	0	0	0	0	40	4	2	46	#DIV/0!	4	9		13	#DIV/0!
751	Structural maintenance of chromosomes protein 4 OS=Homo sapiens GN=SMC4 PE=1 SV=2	SMC4_HUMAN	SMC4	147 kDa	0.52	3.2	[]	0	0	0	0	13	25	8	46	#DIV/0!	143	3	0	146	#DIV/0!
161	Staphylococcal nuclease domain-containing protein 1 OS=Homo sapiens GN=SND1 PE=1 SV=1	SND1_HUMAN	SND1	102 kDa	0.31	6.9	[]	0	0	0	0	22	15	9	46	#DIV/0!	259	18	40	317	#DIV/0!
483	Regulator of nonsense transcripts 1 OS=Homo sapiens GN=UPF1 PE=1 SV=2	RENT1_HUMAN	RENT1	124 kDa	0.42	4.3	[]	0		0	0	29	8	9	46	#DIV/0!	176	0	22	198	#DIV/0!
121	Cell adhesion molecule 1 OS=Homo sapiens GN=CADM1 PE=1 SV=2	CADM1_HUMAN	CADM1	49 kDa	0.27	0.3	[]	0			0	20	24	2	46	#DIV/0!	1	13	2	16	#DIV/0!
1329	RuvB-like 2 OS=Homo sapiens GN=RUVBL2 PE=1 SV=3	RUVB2_HUMAN	RUVB2	51 kDa	0.8	1.3	[]		0		0	18	22	6	46	#DIV/0!	52		8	60	#DIV/0!
794	Vesicular integral-membrane protein VIP36 OS=Homo sapiens GN=LMAN2 PE=1 SV=1	LMAN2_HUMAN	LMAN2	40 kDa	0.54	1.6	[]				0	29	10	7	46	#DIV/0!	45	19	8	72	#DIV/0!
99	Syntaxin-6 OS=Homo sapiens GN=STX6 PE=1 SV=1	STX6_HUMAN	STX6	29 kDa	0.23	0.2	[]				0	29	17		46	#DIV/0!	5	5	0	10	#DIV/0!
1437	Mediator of DNA damage checkpoint protein 1 OS=Homo sapiens GN=MDC1 PE=1 SV=3	MDC1_HUMAN	MDC1	227 kDa	0.87	0.9	[]	0	0	0	0	14	31	2	47	#DIV/0!	33	0	7	40	#DIV/0!
1126	Prolactin regulatory element-binding protein OS=Homo sapiens GN=PREB PE=1 SV=2	PREB_HUMAN	PREB	45 kDa	0.7	1.3	[]	0		0	0	28	12	7	47	#DIV/0!	36	21	4	61	#DIV/0!
1196	Cyclin-dependent kinase 9 OS=Homo sapiens GN=CDK9 PE=1 SV=3	CDK9_HUMAN	CDK9	43 kDa	0.73	1.4	[]	0			0	25	12	10	47	#DIV/0!	24	22	13	59	#DIV/0!
315	Mimitin, mitochondrial OS=Homo sapiens GN=NDUFAF2 PE=1 SV=1	MIMIT_HUMAN	MIMIT	20 kDa	0.37	0	[]	0			0	47		0	47	#DIV/0!		0		0	#DIV/0!
1205	Aspartate--tRNA ligase, cytoplasmic OS=Homo sapiens GN=DARS PE=1 SV=2	SYDC_HUMAN	SYDC	57 kDa	0.74	1.5	[]	0			0	20	14	13	47	#DIV/0!	68		3	71	#DIV/0!
1355	Transmembrane protein 9 OS=Homo sapiens GN=TMEM9 PE=1 SV=1	TMEM9_HUMAN	TMEM9	21 kDa	0.81	0.8	[]	0			0	28	16	3	47	#DIV/0!	8	28	3	39	#DIV/0!
1434	Rho-related GTP-binding protein RhoG OS=Homo sapiens GN=RHOG PE=1 SV=1	RHOG_HUMAN	RHOG	21 kDa	0.86	1.3	[]		0		0	47	0		47	#DIV/0!	61			61	#DIV/0!
661	Glutamine--tRNA ligase OS=Homo sapiens GN=QARS PE=1 SV=1	SYQ_HUMAN	SYQ	88 kDa	0.48	2.7	[]				0	3	25	19	47	#DIV/0!	108	0	18	126	#DIV/0!
164	Adenylate cyclase type 9 OS=Homo sapiens GN=ADCY9 PE=1 SV=4	ADCY9_HUMAN	ADCY9	151 kDa	0.31	0.4	[]	0	0	0	0	24	24	0	48	#DIV/0!	4	12	2	18	#DIV/0!
717	Sorting nexin-27 OS=Homo sapiens GN=SNX27 PE=1 SV=2	SNX27_HUMAN	SNX27	61 kDa	0.5	0.5	[]	0	0		0	32	15	1	48	#DIV/0!	15	0	11	26	#DIV/0!
1123	Exportin-1 OS=Homo sapiens GN=XPO1 PE=1 SV=1	XPO1_HUMAN	XPO1	123 kDa	0.7	1.6	[]	0	0		0	28	13	7	48	#DIV/0!	70		7	77	#DIV/0!
1054	Serine/threonine-protein kinase VRK2 OS=Homo sapiens GN=VRK2 PE=1 SV=3	VRK2_HUMAN	VRK2	58 kDa	0.67	1.5	[]	0			0	16	23	9	48	#DIV/0!	10	59	4	73	#DIV/0!
587	Uncharacterized protein KIAA0754 OS=Homo sapiens GN=KIAA0754 PE=2 SV=4	K0754_HUMAN	K0754	135 kDa	0.45	0.4	[]	0	0		0	39	7	3	49	#DIV/0!	7	9	4	20	#DIV/0!
1572	Protein PRRC2C OS=Homo sapiens GN=PRRC2C PE=1 SV=4	PRC2C_HUMAN	PRC2C	317 kDa	0.95	1.1	[]	0	0		0	24	23	2	49	#DIV/0!	52	0	1	53	#DIV/0!
653	GRIP and coiled-coil domain-containing protein 2 OS=Homo sapiens GN=GCC2 PE=1 SV=4	GCC2_HUMAN	GCC2	196 kDa	0.48	0.2	[]	0		0	0	48	1	0	49	#DIV/0!	11	0		11	#DIV/0!
730	Sideroflexin-1 OS=Homo sapiens GN=SFXN1 PE=1 SV=4	SFXN1_HUMAN	SFXN1	36 kDa	0.51	0.6	[]	0			0	12	29	8	49	#DIV/0!	17		14	31	#DIV/0!
818	Protein disulfide-isomerase A6 OS=Homo sapiens GN=PDIA6 PE=1 SV=1	PDIA6_HUMAN	PDIA6	48 kDa	0.55	0.6	[]		0		0	30	13	6	49	#DIV/0!	24	0	5	29	#DIV/0!
558	Coronin-1C OS=Homo sapiens GN=CORO1C PE=1 SV=1	COR1C_HUMAN	COR1C	53 kDa	0.43	0.4	[]				0	37	12	0	49	#DIV/0!	6	11	3	20	#DIV/0!
896	Myoferlin OS=Homo sapiens GN=MYOF PE=1 SV=1	MYOF_HUMAN	MYOF	235 kDa	0.59	0.7	[]	0	0	0	0	31	13	6	50	#DIV/0!	11	22	0	33	#DIV/0!
729	Trifunctional purine biosynthetic protein adenosine-3 OS=Homo sapiens GN=GART PE=1 SV=1	PUR2_HUMAN	PUR2	108 kDa	0.51	2.7	[]	0	0	0	0	8	18	24	50	#DIV/0!	120	2	11	133	#DIV/0!
1237	Microtubule-associated protein RP/EB family member 2 OS=Homo sapiens GN=MAPRE2 PE=1 SV=1	MARE2_HUMAN	MARE2	37 kDa	0.75	1.5	[]	0			0	38	12	0	50	#DIV/0!	64	9	0	73	#DIV/0!
1412	NEDD8-conjugating enzyme Ubc12 OS=Homo sapiens GN=UBE2M PE=1 SV=1	UBC12_HUMAN	UBC12	21 kDa	0.85	0.8	[]	0			0	41		9	50	#DIV/0!	35	0	5	40	#DIV/0!
500	N-acetyltransferase 10 OS=Homo sapiens GN=NAT10 PE=1 SV=2	NAT10_HUMAN	NAT10	116 kDa	0.42	0.5	[]	0	0	0	0	0	30	21	51	#DIV/0!	16	0	8	24	#DIV/0!
134	Ras GTPase-activating protein nGAP OS=Homo sapiens GN=RASAL2 PE=1 SV=2	NGAP_HUMAN	NGAP	129 kDa	0.28	0.3	[]	0	0	0	0	35	13	3	51	#DIV/0!	9	5	1	15	#DIV/0!
1639	PDZ domain-containing protein GIPC1 OS=Homo sapiens GN=GIPC1 PE=1 SV=2	GIPC1_HUMAN	GIPC1	36 kDa	0.99	1	[]	0		0	0	48	3	0	51	#DIV/0!	52	0	0	52	#DIV/0!
1175	Low molecular weight phosphotyrosine protein phosphatase OS=Homo sapiens GN=ACP1 PE=1 SV=3	PPAC_HUMAN	PPAC	18 kDa	0.72	1.8	[]	0		0	0	51			51	#DIV/0!	91		0	91	#DIV/0!
1138	Guanine nucleotide-binding protein G(I)/G(S)/G(T) subunit beta-1 OS=Homo sapiens GN=GNB1 PE=1 SV=3	GBB1_HUMAN	GBB1	37 kDa	0.7	0.6	[]		0		0	36	15		51	#DIV/0!	25			25	#DIV/0!
1498	Acetyl-coenzyme A transporter 1 OS=Homo sapiens GN=SLC33A1 PE=1 SV=1	ACATN_HUMAN	ACATN	61 kDa	0.9	1.1	[]				0	20	22	9	51	#DIV/0!	0	54	4	58	#DIV/0!
396	Cdc42 effector protein 4 OS=Homo sapiens GN=CDC42EP4 PE=1 SV=1	BORG4_HUMAN	BORG4	38 kDa	0.39	0.2	[]				0	44	6	1	51	#DIV/0!	4	7		11	#DIV/0!
1399	TBC1 domain family member 10A OS=Homo sapiens GN=TBC1D10A PE=1 SV=1	TB10A_HUMAN	TB10A	57 kDa	0.84	0.9	[]				0	27	18	6	51	#DIV/0!	7	29	9	45	#DIV/0!
722	PEST proteolytic signal-containing nuclear protein OS=Homo sapiens GN=PCNP PE=1 SV=2	PCNP_HUMAN	PCNP	19 kDa	0.51	1.7	[]	0			0	37	15	0	52	#DIV/0!	52	27	9	88	#DIV/0!
1356	Protein RFT1 homolog OS=Homo sapiens GN=RFT1 PE=1 SV=1	RFT1_HUMAN	RFT1	60 kDa	0.81	0.9	[]	0			0	16	30	6	52	#DIV/0!	8	27	10	45	#DIV/0!
1188	Renin receptor OS=Homo sapiens GN=ATP6AP2 PE=1 SV=2	RENR_HUMAN	RENR	39 kDa	0.73	0.8	[]	0	0		0	21	26	6	53	#DIV/0!	2	33	5	40	#DIV/0!
1299	Glutamine--fructose-6-phosphate aminotransferase [isomerizing] 1 OS=Homo sapiens GN=GFPT1 PE=1 SV=3	GFPT1_HUMAN	GFPT1	79 kDa	0.78	1.4	[]	0	0	0	0	22	10	22	54	#DIV/0!	69		5	74	#DIV/0!
1341	Serine/threonine-protein kinase PAK 2 OS=Homo sapiens GN=PAK2 PE=1 SV=3	PAK2_HUMAN	PAK2	58 kDa	0.8	0.8	[]	0	0	0	0	45	7	2	54	#DIV/0!	25	15	2	42	#DIV/0!
1513	Unconventional myosin-Ib OS=Homo sapiens GN=MYO1B PE=1 SV=3	MYO1B_HUMAN	MYO1B	132 kDa	0.91	1.2	[]	0	0		0	44	3	7	54	#DIV/0!	63	0	0	63	#DIV/0!
718	Serine/threonine-protein kinase N2 OS=Homo sapiens GN=PKN2 PE=1 SV=1	PKN2_HUMAN	PKN2	112 kDa	0.51	0.7	[]	0	0		0	17	8	29	54	#DIV/0!	23	6	7	36	#DIV/0!
1172	Transcription initiation factor TFIID subunit 7 OS=Homo sapiens GN=TAF7 PE=1 SV=1	TAF7_HUMAN	TAF7	40 kDa	0.72	0.6	[]	0		0	0	44	2	8	54	#DIV/0!	0	34		34	#DIV/0!
1439	Ras-related protein Rab-2A OS=Homo sapiens GN=RAB2A PE=1 SV=1	RAB2A_HUMAN	RAB2A	24 kDa	0.87	1.2	[]	0			0	41	13	0	54	#DIV/0!	55	8	2	65	#DIV/0!
139	Sodium-dependent phosphate transporter 1 OS=Homo sapiens GN=SLC20A1 PE=1 SV=1	S20A1_HUMAN	S20A1	74 kDa	0.29	0.2	[]	0			0	41	6	7	54	#DIV/0!		7	4	11	#DIV/0!
1111	Transportin-1 OS=Homo sapiens GN=TNPO1 PE=1 SV=2	TNPO1_HUMAN	TNPO1	102 kDa	0.69	1.7	[]	0			0	34	13	7	54	#DIV/0!	83		7	90	#DIV/0!
1569	DNA replication licensing factor MCM2 OS=Homo sapiens GN=MCM2 PE=1 SV=4	MCM2_HUMAN	MCM2	102 kDa	0.95	1.1	[]	0	0	0	0	0	13	42	55	#DIV/0!	45		14	59	#DIV/0!
1096	Transmembrane protein 2 OS=Homo sapiens GN=TMEM2 PE=1 SV=1	TMEM2_HUMAN	TMEM2	154 kDa	0.68	1.7	[]	0	0	0	0	22	28	5	55	#DIV/0!	1	92	3	96	#DIV/0!
1159	Threonylcarbamoyladenosine tRNA methylthiotransferase OS=Homo sapiens GN=CDKAL1 PE=1 SV=1	CDKAL_HUMAN	CDKAL	65 kDa	0.71	1.3	[]	0	0		0	30	19	6	55	#DIV/0!	15	51	7	73	#DIV/0!
827	Cysteine and histidine-rich domain-containing protein 1 OS=Homo sapiens GN=CHORDC1 PE=1 SV=2	CHRD1_HUMAN	CHRD1	37 kDa	0.56	2.2	[]	0			0	39	7	9	55	#DIV/0!	103	12	4	119	#DIV/0!
14	Receptor-type tyrosine-protein phosphatase eta OS=Homo sapiens GN=PTPRJ PE=1 SV=3	PTPRJ_HUMAN	PTPRJ	146 kDa	0.085	0.2	[]	0			0	27	21	7	55	#DIV/0!	0	9	1	10	#DIV/0!
1187	Serine/threonine-protein phosphatase 2A 55 kDa regulatory subunit B alpha isoform OS=Homo sapiens GN=PPP2R2A PE=1 SV=1	2ABA_HUMAN	2ABA	52 kDa	0.73	0.7	[]		0	0	0	28	17	10	55	#DIV/0!	36		5	41	#DIV/0!
760	Proliferation-associated protein 2G4 OS=Homo sapiens GN=PA2G4 PE=1 SV=3	PA2G4_HUMAN	PA2G4	44 kDa	0.52	2.2	[]		0		0	40	9	6	55	#DIV/0!	98	13	9	120	#DIV/0!
992	ADP-ribosylation factor-like protein 3 OS=Homo sapiens GN=ARL3 PE=1 SV=2	ARL3_HUMAN	ARL3	20 kDa	0.64	0.7	[]				0	36	16	3	55	#DIV/0!	26	7	4	37	#DIV/0!
1004	LIM and SH3 domain protein 1 OS=Homo sapiens GN=LASP1 PE=1 SV=2	LASP1_HUMAN	LASP1	30 kDa	0.64	0.7	[]	0	0	0	0	35	20	1	56	#DIV/0!	14	20	6	40	#DIV/0!
1	Plakophilin-4 OS=Homo sapiens GN=PKP4 PE=1 SV=2	PKP4_HUMAN	PKP4	132 kDa	0.009	0.04	CD63+LMP1 low, CD63_CT high	0	0	0	0	24	21	11	56	#DIV/0!	2	1	1	4	#DIV/0!
1516	GTPase-activating protein and VPS9 domain-containing protein 1 OS=Homo sapiens GN=GAPVD1 PE=1 SV=2	GAPD1_HUMAN	GAPD1	165 kDa	0.91	0.9	[]	0	0		0	41	14	1	56	#DIV/0!	49	0	0	49	#DIV/0!
1620	Pachytene checkpoint protein 2 homolog OS=Homo sapiens GN=TRIP13 PE=1 SV=2	PCH2_HUMAN	PCH2	49 kDa	0.97	1	[]	0		0	0	35	12	9	56	#DIV/0!	55		3	58	#DIV/0!
1311	Signal recognition particle receptor subunit alpha OS=Homo sapiens GN=SRPR PE=1 SV=2	SRPR_HUMAN	SRPR	70 kDa	0.79	1.4	[]	0		0	0	41	8	7	56	#DIV/0!	69	8		77	#DIV/0!
1153	Raftlin OS=Homo sapiens GN=RFTN1 PE=1 SV=4	RFTN1_HUMAN	RFTN1	63 kDa	0.71	0.7	[]				0	39	15	2	56	#DIV/0!	24	15	2	41	#DIV/0!
1408	Transmembrane protein 109 OS=Homo sapiens GN=TMEM109 PE=1 SV=1	TM109_HUMAN	TM109	26 kDa	0.85	0.8	[]				0	56		0	56	#DIV/0!	40	2	0	42	#DIV/0!
264	Ankyrin repeat domain-containing protein 26 OS=Homo sapiens GN=ANKRD26 PE=1 SV=3	ANR26_HUMAN	ANR26	196 kDa	0.37	0.04	[]	0	0	0	0	55	1	1	57	#DIV/0!	2	0	0	2	#DIV/0!
885	Pre-mRNA-splicing factor ATP-dependent RNA helicase DHX15 OS=Homo sapiens GN=DHX15 PE=1 SV=2	DHX15_HUMAN	DHX15	91 kDa	0.59	2	[]	0	0	0	0	6	25	26	57	#DIV/0!	99		14	113	#DIV/0!
529	Nuclear pore complex protein Nup155 OS=Homo sapiens GN=NUP155 PE=1 SV=1	NU155_HUMAN	NU155	155 kDa	0.43	2.7	[]	0		0	0	31	4	22	57	#DIV/0!	124	12	19	155	#DIV/0!
1527	Insulin-like growth factor 1 receptor OS=Homo sapiens GN=IGF1R PE=1 SV=1	IGF1R_HUMAN	IGF1R	155 kDa	0.92	0.9	[]	0	0	0	0	56	2	0	58	#DIV/0!	50	0	0	50	#DIV/0!
199	Membrane cofactor protein OS=Homo sapiens GN=CD46 PE=1 SV=3	MCP_HUMAN	MCP	44 kDa	0.33	0.3	[]		0	0	0	40	16	2	58	#DIV/0!	1	13	5	19	#DIV/0!
1031	Phosphatidylinositide phosphatase SAC2 OS=Homo sapiens GN=INPP5F PE=1 SV=3	SAC2_HUMAN	SAC2	128 kDa	0.66	0.7	[]	0		0	0	32	17	10	59	#DIV/0!	12	31	0	43	#DIV/0!
720	EH domain-containing protein 4 OS=Homo sapiens GN=EHD4 PE=1 SV=1	EHD4_HUMAN	EHD4	61 kDa	0.51	0.4	[]		0		0	47	6	6	59	#DIV/0!	23	0	2	25	#DIV/0!
1248	Cell cycle control protein 50A OS=Homo sapiens GN=TMEM30A PE=1 SV=1	CC50A_HUMAN	CC50A	41 kDa	0.76	1.3	[]				0	40	15	4	59	#DIV/0!	25	43	6	74	#DIV/0!
71	Phenylalanine--tRNA ligase beta subunit OS=Homo sapiens GN=FARSB PE=1 SV=3	SYFB_HUMAN	SYFB	66 kDa	0.19	0.2	[]	0	0	0	0	0	25	35	60	#DIV/0!	3		7	10	#DIV/0!
583	60S ribosomal protein L19 OS=Homo sapiens GN=RPL19 PE=1 SV=1	RL19_HUMAN	RL19	23 kDa	0.45	0.3	[]	0			0	52	4	4	60	#DIV/0!	11	5	3	19	#DIV/0!
13	Uncharacterized protein KIAA1522 OS=Homo sapiens GN=KIAA1522 PE=1 SV=2	K1522_HUMAN	K1522	107 kDa	0.085	0.2	[]			0	0	28	23	9	60	#DIV/0!	1	12	0	13	#DIV/0!
865	Ras-related protein Rab-31 OS=Homo sapiens GN=RAB31 PE=1 SV=1	RAB31_HUMAN	RAB31	22 kDa	0.58	0.5	[]				0	50	8	2	60	#DIV/0!	23	7	0	30	#DIV/0!
1655	Translocon-associated protein subunit alpha OS=Homo sapiens GN=SSR1 PE=1 SV=3	SSRA_HUMAN	SSRA	32 kDa	1	1	[]				0	35	21	4	60	#DIV/0!	23	25	12	60	#DIV/0!
1371	Lamin-B1 OS=Homo sapiens GN=LMNB1 PE=1 SV=2	LMNB1_HUMAN	LMNB1	66 kDa	0.83	1.2	[]	0	0	0	0	21	26	14	61	#DIV/0!	50	11	8	69	#DIV/0!
385	Plexin-B2 OS=Homo sapiens GN=PLXNB2 PE=1 SV=3	PLXB2_HUMAN	PLXB2	205 kDa	0.38	0.07	[]	0	0	0	0	59	1	1	61	#DIV/0!	4	0	0	4	#DIV/0!
1451	Immunoglobulin superfamily member 3 OS=Homo sapiens GN=IGSF3 PE=2 SV=3	IGSF3_HUMAN	IGSF3	135 kDa	0.87	0.9	[]	0	0		0	46	3	12	61	#DIV/0!	12	40	0	52	#DIV/0!
635	CD276 antigen OS=Homo sapiens GN=CD276 PE=1 SV=1	CD276_HUMAN	CD276	57 kDa	0.47	0.6	[]				0	41	15	5	61	#DIV/0!	17	12	5	34	#DIV/0!
610	Importin subunit alpha-1 OS=Homo sapiens GN=KPNA2 PE=1 SV=1	IMA1_HUMAN	IMA1	58 kDa	0.46	2.6	[]				0	21	20	20	61	#DIV/0!	132	1	27	160	#DIV/0!
780	ATP-dependent 6-phosphofructokinase, platelet type OS=Homo sapiens GN=PFKP PE=1 SV=2	PFKAP_HUMAN	PFKAP	86 kDa	0.53	2.4	[]	0	0	0	0	21	16	25	62	#DIV/0!	133	0	15	148	#DIV/0!
989	CTP synthase 1 OS=Homo sapiens GN=CTPS1 PE=1 SV=2	PYRG1_HUMAN	PYRG1	67 kDa	0.64	0.7	[]	0			0	25	24	13	62	#DIV/0!	38	3	2	43	#DIV/0!
459	Synaptosomal-associated protein 47 OS=Homo sapiens GN=SNAP47 PE=1 SV=3	SNP47_HUMAN	SNP47	53 kDa	0.4	0.2	[]	0			0	57	3	2	62	#DIV/0!	6	5	0	11	#DIV/0!
202	SH2 domain-containing adapter protein B OS=Homo sapiens GN=SHB PE=1 SV=2	SHB_HUMAN	SHB	55 kDa	0.33	0.3	[]		0		0	45	15	2	62	#DIV/0!	0	16		16	#DIV/0!
1260	Sterol O-acyltransferase 1 OS=Homo sapiens GN=SOAT1 PE=1 SV=3	SOAT1_HUMAN	SOAT1	65 kDa	0.76	0.8	[]		0		0	32	22	8	62	#DIV/0!	33	16	2	51	#DIV/0!
208	Zinc finger CCCH domain-containing protein 15 OS=Homo sapiens GN=ZC3H15 PE=1 SV=1	ZC3HF_HUMAN	ZC3HF	49 kDa	0.33	0.4	[]	0	0	0	0	39	23	1	63	#DIV/0!	11	11	4	26	#DIV/0!
977	Protein FAM91A1 OS=Homo sapiens GN=FAM91A1 PE=1 SV=3	F91A1_HUMAN	F91A1	94 kDa	0.63	0.5	[]		0		0	58	5		63	#DIV/0!	24	8	0	32	#DIV/0!
1113	60S acidic ribosomal protein P0 OS=Homo sapiens GN=RPLP0 PE=1 SV=1	RLA0_HUMAN	RLA0	34 kDa	0.69	1.6	[]	0	0	0	0	25	30	9	64	#DIV/0!	91	0	11	102	#DIV/0!
1656	High affinity cationic amino acid transporter 1 OS=Homo sapiens GN=SLC7A1 PE=1 SV=1	CTR1_HUMAN	CTR1	68 kDa	1	1	[]	0	0		0	20	28	16	64	#DIV/0!	12	42	10	64	#DIV/0!
1061	Inner nuclear membrane protein Man1 OS=Homo sapiens GN=LEMD3 PE=1 SV=2	MAN1_HUMAN	MAN1	100 kDa	0.67	1.5	[]	0	0		0	31	20	13	64	#DIV/0!	11	77	8	96	#DIV/0!
1612	Solute carrier family 22 member 5 OS=Homo sapiens GN=SLC22A5 PE=1 SV=1	S22A5_HUMAN	S22A5	63 kDa	0.97	1	[]	0		0	0	11	50	3	64	#DIV/0!	9	36	21	66	#DIV/0!
1534	SCY1-like protein 2 OS=Homo sapiens GN=SCYL2 PE=1 SV=1	SCYL2_HUMAN	SCYL2	104 kDa	0.93	0.9	[]	0		0	0	40	21	3	64	#DIV/0!	36	10	14	60	#DIV/0!
269	Hepatocyte growth factor-regulated tyrosine kinase substrate OS=Homo sapiens GN=HGS PE=1 SV=1	HGS_HUMAN	HGS	86 kDa	0.37	0.2	[]	0			0	56	7	1	64	#DIV/0!	6	3	2	11	#DIV/0!
1030	Glycerol-3-phosphate acyltransferase 3 OS=Homo sapiens GN=AGPAT9 PE=1 SV=2	GPAT3_HUMAN	GPAT3	49 kDa	0.66	1.4	[]			0	0	37	23	4	64	#DIV/0!	29	55	5	89	#DIV/0!
447	Protein sprouty homolog 2 OS=Homo sapiens GN=SPRY2 PE=1 SV=1	SPY2_HUMAN	SPY2	35 kDa	0.4	0.3	[]				0	51	13	0	64	#DIV/0!	11	9		20	#DIV/0!
936	Vesicle transport through interaction with t-SNAREs homolog 1B OS=Homo sapiens GN=VTI1B PE=1 SV=3	VTI1B_HUMAN	VTI1B	27 kDa	0.61	0.4	[]	0	0	0	0	65		0	65	#DIV/0!	24	0	3	27	#DIV/0!
1608	PDZ and LIM domain protein 5 OS=Homo sapiens GN=PDLIM5 PE=1 SV=5	PDLI5_HUMAN	PDLI5	64 kDa	0.97	1	[]	0			0	19	35	11	65	#DIV/0!	17	47	3	67	#DIV/0!
557	Myotubularin-related protein 5 OS=Homo sapiens GN=SBF1 PE=1 SV=3	MTMR5_HUMAN	MTMR5	208 kDa	0.43	0.2	[]	0	0	0	0	62	2	2	66	#DIV/0!	12	1		13	#DIV/0!
1454	26S protease regulatory subunit 4 OS=Homo sapiens GN=PSMC1 PE=1 SV=1	PRS4_HUMAN	PRS4	49 kDa	0.88	1.2	[]		0	0	0	51	5	10	66	#DIV/0!	74		6	80	#DIV/0!
637	Phosphate carrier protein, mitochondrial OS=Homo sapiens GN=SLC25A3 PE=1 SV=2	MPCP_HUMAN	MPCP	40 kDa	0.47	0.6	[]	0	0	0	0	22	34	11	67	#DIV/0!	32	0	7	39	#DIV/0!
1494	Coatomer subunit delta OS=Homo sapiens GN=ARCN1 PE=1 SV=1	COPD_HUMAN	COPD	57 kDa	0.9	1.1	[]	0	0		0	48	15	4	67	#DIV/0!	38	19	16	73	#DIV/0!
147	Secretory carrier-associated membrane protein 2 OS=Homo sapiens GN=SCAMP2 PE=1 SV=2	SCAM2_HUMAN	SCAM2	37 kDa	0.29	0.5	[]				0	32	31	4	67	#DIV/0!	10	15	8	33	#DIV/0!
1218	Serine/threonine-protein phosphatase 2A 65 kDa regulatory subunit A alpha isoform OS=Homo sapiens GN=PPP2R1A PE=1 SV=4	2AAA_HUMAN	2AAA	65 kDa	0.75	0.7	[]	0	0	0	0	43	17	8	68	#DIV/0!	44	0	6	50	#DIV/0!
85	Activity-regulated cytoskeleton-associated protein OS=Homo sapiens GN=ARC PE=2 SV=1	ARC_HUMAN	ARC	45 kDa	0.21	0.3	[]	0			0	42	13	13	68	#DIV/0!	6	15		21	#DIV/0!
580	Neuroplastin OS=Homo sapiens GN=NPTN PE=1 SV=2	NPTN_HUMAN	NPTN	44 kDa	0.45	0.7	[]	0			0	33	23	12	68	#DIV/0!	12	26	10	48	#DIV/0!
1270	WD repeat-containing protein 44 OS=Homo sapiens GN=WDR44 PE=1 SV=1	WDR44_HUMAN	WDR44	101 kDa	0.77	0.7	[]	0			0	62	6	0	68	#DIV/0!	13	34	0	47	#DIV/0!
1127	UbiA prenyltransferase domain-containing protein 1 OS=Homo sapiens GN=UBIAD1 PE=1 SV=1	UBIA1_HUMAN	UBIA1	37 kDa	0.7	0.7	[]			0	0	46	21	1	68	#DIV/0!	5	39	2	46	#DIV/0!
824	Putative ATP-dependent RNA helicase DHX30 OS=Homo sapiens GN=DHX30 PE=1 SV=1	DHX30_HUMAN	DHX30	134 kDa	0.55	0.6	[]	0	0	0	0	5	14	50	69	#DIV/0!	28		10	38	#DIV/0!
454	Protocadherin Fat 1 OS=Homo sapiens GN=FAT1 PE=1 SV=2	FAT1_HUMAN	FAT1	506 kDa	0.4	0.1	[]	0	0	0	0	67	2	0	69	#DIV/0!	7	0	0	7	#DIV/0!
1397	Neurofibromin OS=Homo sapiens GN=NF1 PE=1 SV=2	NF1_HUMAN	NF1	319 kDa	0.84	0.7	[]	0	0	0	0	67	1	1	69	#DIV/0!	51		0	51	#DIV/0!
1100	Vesicle-associated membrane protein 4 OS=Homo sapiens GN=VAMP4 PE=1 SV=2	VAMP4_HUMAN	VAMP4	16 kDa	0.68	0.5	[]	0			0	69			69	#DIV/0!	35	0		35	#DIV/0!
1238	DDRGK domain-containing protein 1 OS=Homo sapiens GN=DDRGK1 PE=1 SV=2	DDRGK_HUMAN	DDRGK	36 kDa	0.76	0.8	[]		0		0	41	18	10	69	#DIV/0!	25	28	4	57	#DIV/0!
739	Puromycin-sensitive aminopeptidase OS=Homo sapiens GN=NPEPPS PE=1 SV=2	PSA_HUMAN	PSA	103 kDa	0.51	0.6	[]	0	0	0	0	8	35	27	70	#DIV/0!	34	0	8	42	#DIV/0!
611	Paralemmin-1 OS=Homo sapiens GN=PALM PE=1 SV=2	PALM_HUMAN	PALM	42 kDa	0.46	0.5	[]	0		0	0	24	46	0	70	#DIV/0!	1	26	5	32	#DIV/0!
1035	Tubby-related protein 3 OS=Homo sapiens GN=TULP3 PE=1 SV=2	TULP3_HUMAN	TULP3	50 kDa	0.66	0.6	[]	0			0	50	6	14	70	#DIV/0!	4	37	4	45	#DIV/0!
707	Cationic amino acid transporter 2 OS=Homo sapiens GN=SLC7A2 PE=1 SV=2	CTR2_HUMAN	CTR2	72 kDa	0.5	0.6	[]		0	0	0	34	33	3	70	#DIV/0!	16	24	4	44	#DIV/0!
1246	ADP-ribosylation factor 6 OS=Homo sapiens GN=ARF6 PE=1 SV=2	ARF6_HUMAN	ARF6	20 kDa	0.76	0.6	[]				0	70			70	#DIV/0!	42	1	0	43	#DIV/0!
987	Testis-expressed sequence 264 protein OS=Homo sapiens GN=TEX264 PE=1 SV=1	TX264_HUMAN	TX264	34 kDa	0.64	0.7	[]	0		0	0	39	28	4	71	#DIV/0!	28	16	9	53	#DIV/0!
932	AP-3 complex subunit sigma-1 OS=Homo sapiens GN=AP3S1 PE=1 SV=1	AP3S1_HUMAN	AP3S1	22 kDa	0.61	0.5	[]				0	55	10	6	71	#DIV/0!	35	0	4	39	#DIV/0!
1370	60S ribosomal protein L13a OS=Homo sapiens GN=RPL13A PE=1 SV=2	RL13A_HUMAN	RL13A	24 kDa	0.82	1.3	[]	0		0	0	44	24	4	72	#DIV/0!	92	0	3	95	#DIV/0!
696	Erythrocyte band 7 integral membrane protein OS=Homo sapiens GN=STOM PE=1 SV=3	STOM_HUMAN	STOM	32 kDa	0.5	0.5	[]	0	0	0	0	55	13	5	73	#DIV/0!	9	23	4	36	#DIV/0!
1249	ATP-binding cassette sub-family E member 1 OS=Homo sapiens GN=ABCE1 PE=1 SV=1	ABCE1_HUMAN	ABCE1	67 kDa	0.76	0.7	[]	0			0	0	56	17	73	#DIV/0!	18	1	35	54	#DIV/0!
1610	Leucine-rich repeat-containing protein 16C OS=Homo sapiens GN=RLTPR PE=1 SV=2	LR16C_HUMAN	LR16C	155 kDa	0.97	1	[]	0	0	0	0	44	29	1	74	#DIV/0!	22	43	11	76	#DIV/0!
997	Lysophospholipid acyltransferase 7 OS=Homo sapiens GN=MBOAT7 PE=1 SV=2	MBOA7_HUMAN	MBOA7	53 kDa	0.64	1.3	[]	0			0	48	18	8	74	#DIV/0!	39	44	14	97	#DIV/0!
954	Caveolin-1 OS=Homo sapiens GN=CAV1 PE=1 SV=4	CAV1_HUMAN	CAV1	20 kDa	0.62	0.6	[]				0	58	11	5	74	#DIV/0!	35	5	2	42	#DIV/0!
491	Ras-related protein Rab-5C OS=Homo sapiens GN=RAB5C PE=1 SV=2	RAB5C_HUMAN	RAB5C	23 kDa	0.42	0.4	[]				0	50	15	9	74	#DIV/0!	28	0	4	32	#DIV/0!
1286	Scavenger receptor class B member 1 OS=Homo sapiens GN=SCARB1 PE=1 SV=1	SCRB1_HUMAN	SCRB1	61 kDa	0.77	0.9	[]				0	23	36	15	74	#DIV/0!	8	41	14	63	#DIV/0!
1630	Caldesmon OS=Homo sapiens GN=CALD1 PE=1 SV=3	CALD1_HUMAN	CALD1	93 kDa	0.98	1	[]	0	0	0	0	47	26	2	75	#DIV/0!	30	35	11	76	#DIV/0!
595	Serine/threonine-protein kinase 38 OS=Homo sapiens GN=STK38 PE=1 SV=1	STK38_HUMAN	STK38	54 kDa	0.45	0.4	[]	0	0	0	0	57	7	11	75	#DIV/0!	11	21		32	#DIV/0!
669	TAR DNA-binding protein 43 OS=Homo sapiens GN=TARDBP PE=1 SV=1	TADBP_HUMAN	TADBP	45 kDa	0.49	2.4	[]	0			0	53	15	7	75	#DIV/0!	141	2	34	177	#DIV/0!
1223	Transmembrane protein 199 OS=Homo sapiens GN=TMEM199 PE=1 SV=1	TM199_HUMAN	TM199	23 kDa	0.75	0.7	[]	0			0	63	0	12	75	#DIV/0!	43	5	3	51	#DIV/0!
1192	U5 small nuclear ribonucleoprotein 200 kDa helicase OS=Homo sapiens GN=SNRNP200 PE=1 SV=2	U520_HUMAN	U520	245 kDa	0.73	1.5	[]	0	0	0	0	0	60	16	76	#DIV/0!	87	0	24	111	#DIV/0!
817	Ral GTPase-activating protein subunit beta OS=Homo sapiens GN=RALGAPB PE=1 SV=1	RLGPB_HUMAN	RLGPB	167 kDa	0.55	0.4	[]	0	0	0	0	69	7	1	77	#DIV/0!	29	0		29	#DIV/0!
494	Tumor protein D54 OS=Homo sapiens GN=TPD52L2 PE=1 SV=2	TPD54_HUMAN	TPD54	22 kDa	0.42	0.5	[]	0		0	0	31	42	4	77	#DIV/0!	1	29	9	39	#DIV/0!
990	La-related protein 1 OS=Homo sapiens GN=LARP1 PE=1 SV=2	LARP1_HUMAN	LARP1	124 kDa	0.64	0.6	[]	0	0		0	12	59	7	78	#DIV/0!	35	7	7	49	#DIV/0!
1359	Heterogeneous nuclear ribonucleoprotein L OS=Homo sapiens GN=HNRNPL PE=1 SV=2	HNRPL_HUMAN	HNRPL	64 kDa	0.81	1.3	[]	0			0	34	42	2	78	#DIV/0!	96	1	6	103	#DIV/0!
1491	Junctophilin-1 OS=Homo sapiens GN=JPH1 PE=1 SV=2	JPH1_HUMAN	JPH1	72 kDa	0.9	0.9	[]		0	0	0	52	21	5	78	#DIV/0!	4	63	1	68	#DIV/0!
1330	Serine-threonine kinase receptor-associated protein OS=Homo sapiens GN=STRAP PE=1 SV=1	STRAP_HUMAN	STRAP	38 kDa	0.8	1.3	[]				0	46	25	7	78	#DIV/0!	96	2	7	105	#DIV/0!
912	ATP-citrate synthase OS=Homo sapiens GN=ACLY PE=1 SV=3	ACLY_HUMAN	ACLY	121 kDa	0.6	1.8	[]	0	0	0	0	2	56	21	79	#DIV/0!	117	0	28	145	#DIV/0!
163	Sorting nexin-30 OS=Homo sapiens GN=SNX30 PE=1 SV=1	SNX30_HUMAN	SNX30	50 kDa	0.31	0.2	[]	0	0		0	63	14	2	79	#DIV/0!	2	9	2	13	#DIV/0!
1658	Serine/threonine-protein phosphatase PP1-alpha catalytic subunit OS=Homo sapiens GN=PPP1CA PE=1 SV=1	PP1A_HUMAN	PP1A	38 kDa	1	1	[]	0		0	0	69	9	1	79	#DIV/0!	71	3	5	79	#DIV/0!
906	Eukaryotic translation initiation factor 5A-1 OS=Homo sapiens GN=EIF5A PE=1 SV=2	IF5A1_HUMAN	IF5A1	17 kDa	0.6	2.6	[]	0			0	79		0	79	#DIV/0!	205			205	#DIV/0!
165	Translocation protein SEC62 OS=Homo sapiens GN=SEC62 PE=1 SV=1	SEC62_HUMAN	SEC62	46 kDa	0.31	0.4	[]	0			0	47	26	6	79	#DIV/0!	7	23	2	32	#DIV/0!
1366	26S protease regulatory subunit 7 OS=Homo sapiens GN=PSMC2 PE=1 SV=3	PRS7_HUMAN	PRS7	49 kDa	0.82	1.3	[]				0	59	10	10	79	#DIV/0!	91	5	7	103	#DIV/0!
1372	Dynactin subunit 1 OS=Homo sapiens GN=DCTN1 PE=1 SV=3	DCTN1_HUMAN	DCTN1	142 kDa	0.83	1.2	[]	0	0	0	0	12	54	14	80	#DIV/0!	74	0	24	98	#DIV/0!
1308	DNA replication licensing factor MCM5 OS=Homo sapiens GN=MCM5 PE=1 SV=5	MCM5_HUMAN	MCM5	82 kDa	0.79	0.8	[]	0	0	0	0	17	39	24	80	#DIV/0!	50	0	16	66	#DIV/0!
1633	Ras-related protein Rap-1A OS=Homo sapiens GN=RAP1A PE=1 SV=1	RAP1A_HUMAN	RAP1A	21 kDa	0.98	1	[]				0	46	24	10	80	#DIV/0!	51	19	11	81	#DIV/0!
584	E3 ubiquitin-protein ligase Itchy homolog OS=Homo sapiens GN=ITCH PE=1 SV=2	ITCH_HUMAN	ITCH	103 kDa	0.45	0.2	[]	0	0	0	0	80	0	1	81	#DIV/0!	13	0	0	13	#DIV/0!
1469	Synaptic vesicle membrane protein VAT-1 homolog OS=Homo sapiens GN=VAT1 PE=1 SV=2	VAT1_HUMAN	VAT1	42 kDa	0.89	0.9	[]	0			0	52	20	9	81	#DIV/0!	33	39	1	73	#DIV/0!
187	Polymerase I and transcript release factor OS=Homo sapiens GN=PTRF PE=1 SV=1	PTRF_HUMAN	PTRF	43 kDa	0.32	0.1	[]		0	0	0	68	9	4	81	#DIV/0!	5	6		11	#DIV/0!
1468	Protein kinase C and casein kinase substrate in neurons protein 2 OS=Homo sapiens GN=PACSIN2 PE=1 SV=2	PACN2_HUMAN	PACN2	56 kDa	0.89	0.9	[]	0	0		0	50	15	17	82	#DIV/0!	28	41	6	75	#DIV/0!
1058	Endothelial differentiation-related factor 1 OS=Homo sapiens GN=EDF1 PE=1 SV=1	EDF1_HUMAN	EDF1	16 kDa	0.67	0.5	[]	0			0	82	0		82	#DIV/0!	39	1		40	#DIV/0!
1401	Creatine kinase B-type OS=Homo sapiens GN=CKB PE=1 SV=1	KCRB_HUMAN	KCRB	43 kDa	0.84	1.3	[]	0			0	78	0	4	82	#DIV/0!	110	0		110	#DIV/0!
149	Protein kinase C and casein kinase substrate in neurons protein 3 OS=Homo sapiens GN=PACSIN3 PE=1 SV=2	PACN3_HUMAN	PACN3	48 kDa	0.3	0.3	[]	0	0	0	0	60	15	8	83	#DIV/0!	6	15	2	23	#DIV/0!
1384	Ras-related protein Rab-9A OS=Homo sapiens GN=RAB9A PE=1 SV=1	RAB9A_HUMAN	RAB9A	23 kDa	0.83	0.8	[]	0	0		0	68	11	4	83	#DIV/0!	57	4	4	65	#DIV/0!
1410	Coiled-coil domain-containing protein 43 OS=Homo sapiens GN=CCDC43 PE=1 SV=2	CCD43_HUMAN	CCD43	25 kDa	0.85	0.9	[]	0			0	39	35	9	83	#DIV/0!	27	36	13	76	#DIV/0!
893	Solute carrier family 2, facilitated glucose transporter member 1 OS=Homo sapiens GN=SLC2A1 PE=1 SV=2	GTR1_HUMAN	GTR1	54 kDa	0.59	0.7	[]	0			0	32	43	8	83	#DIV/0!	11	39	8	58	#DIV/0!
109	ADP-ribosylation factor GTPase-activating protein 1 OS=Homo sapiens GN=ARFGAP1 PE=1 SV=2	ARFG1_HUMAN	ARFG1	45 kDa	0.25	0.4	[]				0	46	29	8	83	#DIV/0!	10	22	0	32	#DIV/0!
695	Beta-adducin OS=Homo sapiens GN=ADD2 PE=1 SV=3	ADDB_HUMAN	ADDB	81 kDa	0.5	0.6	[]	0	0	0	0	52	25	7	84	#DIV/0!	27	11	10	48	#DIV/0!
62	Arfaptin-1 OS=Homo sapiens GN=ARFIP1 PE=1 SV=2	ARFP1_HUMAN	ARFP1	42 kDa	0.17	0.2	[]				0	52	25	7	84	#DIV/0!	8	9	1	18	#DIV/0!
962	RUN and FYVE domain-containing protein 1 OS=Homo sapiens GN=RUFY1 PE=1 SV=2	RUFY1_HUMAN	RUFY1	80 kDa	0.62	0.6	[]	0		0	0	61	12	12	85	#DIV/0!	44	2	5	51	#DIV/0!
1400	Carboxy-terminal domain RNA polymerase II polypeptide A small phosphatase 1 OS=Homo sapiens GN=CTDSP1 PE=1 SV=1	CTDS1_HUMAN	CTDS1	29 kDa	0.84	0.9	[]	0			0	47	28	10	85	#DIV/0!	23	42	11	76	#DIV/0!
978	Matrin-3 OS=Homo sapiens GN=MATR3 PE=1 SV=2	MATR3_HUMAN	MATR3	95 kDa	0.63	1.7	[]	0			0	16	49	20	85	#DIV/0!	117	6	19	142	#DIV/0!
866	GTP-binding protein SAR1b OS=Homo sapiens GN=SAR1B PE=1 SV=1	SAR1B_HUMAN	SAR1B	22 kDa	0.58	1.6	[]	0			0	55	30		85	#DIV/0!	97	32	11	140	#DIV/0!
671	Zinc transporter ZIP14 OS=Homo sapiens GN=SLC39A14 PE=1 SV=3	S39AE_HUMAN	S39AE	54 kDa	0.49	0.6	[]				0	54	22	9	85	#DIV/0!	23	25	2	50	#DIV/0!
376	Chloride channel CLIC-like protein 1 OS=Homo sapiens GN=CLCC1 PE=1 SV=1	CLCC1_HUMAN	CLCC1	62 kDa	0.37	0.3	[]	0	0	0	0	66	14	6	86	#DIV/0!	7	20	0	27	#DIV/0!
47	Early endosome antigen 1 OS=Homo sapiens GN=EEA1 PE=1 SV=2	EEA1_HUMAN	EEA1	162 kDa	0.15	0.07	[]	0	0	0	0	32	53	1	86	#DIV/0!	6	0	0	6	#DIV/0!
101	Vacuolar protein sorting-associated protein 45 OS=Homo sapiens GN=VPS45 PE=1 SV=1	VPS45_HUMAN	VPS45	65 kDa	0.24	0.5	[]	0			0	47	25	14	86	#DIV/0!	11	24	4	39	#DIV/0!
1339	Ras-related protein R-Ras2 OS=Homo sapiens GN=RRAS2 PE=1 SV=1	RRAS2_HUMAN	RRAS2	23 kDa	0.8	0.7	[]		0	0	0	70	12	4	86	#DIV/0!	60		3	63	#DIV/0!
1406	Serine/threonine-protein phosphatase PP1-beta catalytic subunit OS=Homo sapiens GN=PPP1CB PE=1 SV=3	PP1B_HUMAN	PP1B	37 kDa	0.85	0.8	[]				0	65	19	2	86	#DIV/0!	63		6	69	#DIV/0!
1496	X-ray repair cross-complementing protein 5 OS=Homo sapiens GN=XRCC5 PE=1 SV=3	XRCC5_HUMAN	XRCC5	83 kDa	0.9	1.1	[]	0	0		0	17	57	14	88	#DIV/0!	79		20	99	#DIV/0!
683	HLA class I histocompatibility antigen, Cw-6 alpha chain OS=Homo sapiens GN=HLA-C PE=1 SV=2	1C06_HUMAN	1C06	41 kDa	0.49	3.1	[]				0	69	14	5	88	#DIV/0!	88	29		117	#DIV/0!
973	Zinc transporter ZIP10 OS=Homo sapiens GN=SLC39A10 PE=1 SV=2	S39AA_HUMAN	S39AA	94 kDa	0.63	0.7	[]	0			0	36	40	13	89	#DIV/0!	16	45	5	66	#DIV/0!
31	Cullin-associated NEDD8-dissociated protein 1 OS=Homo sapiens GN=CAND1 PE=1 SV=2	CAND1_HUMAN	CAND1	136 kDa	0.12	0.2	[]	0	0	0	0	22	52	16	90	#DIV/0!	13	0	8	21	#DIV/0!
802	Cytoplasmic FMR1-interacting protein 2 OS=Homo sapiens GN=CYFIP2 PE=1 SV=2	CYFP2_HUMAN	CYFP2	148 kDa	0.54	0.5	[]	0		0	0	56	19	15	90	#DIV/0!	34	3	4	41	#DIV/0!
1232	Desmocollin-2 OS=Homo sapiens GN=DSC2 PE=1 SV=1	DSC2_HUMAN	DSC2	100 kDa	0.75	0.7	[]	0		0	0	67	19	4	90	#DIV/0!	13	52		65	#DIV/0!
1193	Transmembrane protein 237 OS=Homo sapiens GN=TMEM237 PE=1 SV=2	TM237_HUMAN	TM237	46 kDa	0.73	0.8	[]	0		0	0	48	41	1	90	#DIV/0!	17	38	17	72	#DIV/0!
1104	Vesicle transport protein USE1 OS=Homo sapiens GN=USE1 PE=1 SV=2	USE1_HUMAN	USE1	29 kDa	0.68	0.7	[]		0	0	0	59	22	9	90	#DIV/0!	13	43	10	66	#DIV/0!
452	Niban-like protein 1 OS=Homo sapiens GN=FAM129B PE=1 SV=3	NIBL1_HUMAN	NIBL1	84 kDa	0.4	0.5	[]			0	0	43	40	7	90	#DIV/0!	6	35	4	45	#DIV/0!
523	Nectin-3 OS=Homo sapiens GN=PVRL3 PE=1 SV=1	PVRL3_HUMAN	PVRL3	61 kDa	0.43	0.5	[]				0	50	34	6	90	#DIV/0!	5	37	3	45	#DIV/0!
246	Cytoplasmic FMR1-interacting protein 1 OS=Homo sapiens GN=CYFIP1 PE=1 SV=1	CYFP1_HUMAN	CYFP1	145 kDa	0.36	0.5	[]	0		0	0	53	18	20	91	#DIV/0!	35	3	5	43	#DIV/0!
1141	Protein XRP2 OS=Homo sapiens GN=RP2 PE=1 SV=4	XRP2_HUMAN	XRP2	40 kDa	0.71	0.8	[]	0			0	45	42	4	91	#DIV/0!	32	35	4	71	#DIV/0!
1134	Signal recognition particle receptor subunit beta OS=Homo sapiens GN=SRPRB PE=1 SV=3	SRPRB_HUMAN	SRPRB	30 kDa	0.7	1.4	[]	0	0		0	67	14	11	92	#DIV/0!	80	38	8	126	#DIV/0!
1456	Coatomer subunit beta OS=Homo sapiens GN=COPB1 PE=1 SV=3	COPB_HUMAN	COPB	107 kDa	0.88	1.2	[]	0	0	0	0	21	31	41	93	#DIV/0!	95		13	108	#DIV/0!
744	Obscurin-like protein 1 OS=Homo sapiens GN=OBSL1 PE=1 SV=4	OBSL1_HUMAN	OBSL1	207 kDa	0.51	0.6	[]	0	0	0	0	59	20	14	93	#DIV/0!	13	40	1	54	#DIV/0!
1531	Myosin-10 OS=Homo sapiens GN=MYH10 PE=1 SV=3	MYH10_HUMAN	MYH10	229 kDa	0.92	1.1	[]	0	0	0	0	23	57	14	94	#DIV/0!	70	0	16	86	#DIV/0!
1474	Ras-related C3 botulinum toxin substrate 1 OS=Homo sapiens GN=RAC1 PE=1 SV=1	RAC1_HUMAN	RAC1	21 kDa	0.89	0.9	[]	0			0	75	13	6	94	#DIV/0!	66	11	4	81	#DIV/0!
1081	Heterogeneous nuclear ribonucleoprotein A3 OS=Homo sapiens GN=HNRNPA3 PE=1 SV=2	ROA3_HUMAN	ROA3	40 kDa	0.68	1.7	[]	0	0		0	61	30	4	95	#DIV/0!	148	2	12	162	#DIV/0!
489	Myosin phosphatase Rho-interacting protein OS=Homo sapiens GN=MPRIP PE=1 SV=3	MPRIP_HUMAN	MPRIP	117 kDa	0.42	0.3	[]	0		0	0	77	12	6	95	#DIV/0!	25	1	4	30	#DIV/0!
1358	60S ribosomal protein L4 OS=Homo sapiens GN=RPL4 PE=1 SV=5	RL4_HUMAN	RL4	48 kDa	0.81	1.3	[]	0		0	0	43	47	5	95	#DIV/0!	113	3	8	124	#DIV/0!
960	GMP synthase [glutamine-hydrolyzing] OS=Homo sapiens GN=GMPS PE=1 SV=1	GUAA_HUMAN	GUAA	77 kDa	0.62	1.8	[]		0	0	0	30	30	35	95	#DIV/0!	156	3	15	174	#DIV/0!
795	Coatomer subunit alpha OS=Homo sapiens GN=COPA PE=1 SV=2	COPA_HUMAN	COPA	138 kDa	0.54	2.1	[]	0	0	0	0	7	65	24	96	#DIV/0!	159	0	39	198	#DIV/0!
1079	Serine/threonine-protein phosphatase PGAM5, mitochondrial OS=Homo sapiens GN=PGAM5 PE=1 SV=2	PGAM5_HUMAN	PGAM5	32 kDa	0.68	0.6	[]				0	87	8	1	96	#DIV/0!	47		7	54	#DIV/0!
1583	E3 ubiquitin-protein ligase CHIP OS=Homo sapiens GN=STUB1 PE=1 SV=2	CHIP_HUMAN	CHIP	35 kDa	0.95	0.9	[]	0			0	88	8	1	97	#DIV/0!	84	2	4	90	#DIV/0!
1558	Feline leukemia virus subgroup C receptor-related protein 1 OS=Homo sapiens GN=FLVCR1 PE=1 SV=1	FLVC1_HUMAN	FLVC1	60 kDa	0.94	1.1	[]	0			0	44	47	6	97	#DIV/0!	15	84	5	104	#DIV/0!
1617	Sodium-dependent neutral amino acid transporter B(0)AT2 OS=Homo sapiens GN=SLC6A15 PE=1 SV=1	S6A15_HUMAN	S6A15	82 kDa	0.97	1	[]	0			0	45	39	13	97	#DIV/0!	26	59	10	95	#DIV/0!
1375	Peptidyl-prolyl cis-trans isomerase FKBP8 OS=Homo sapiens GN=FKBP8 PE=1 SV=2	FKBP8_HUMAN	FKBP8	45 kDa	0.83	1.2	[]				0	67	13	17	97	#DIV/0!	81	16	19	116	#DIV/0!
216	Numb-like protein OS=Homo sapiens GN=NUMBL PE=1 SV=1	NUMBL_HUMAN	NUMBL	65 kDa	0.34	0.4	[]				0	62	24	11	97	#DIV/0!	16	21	1	38	#DIV/0!
1467	Protein-L-isoaspartate(D-aspartate) O-methyltransferase OS=Homo sapiens GN=PCMT1 PE=1 SV=4	PIMT_HUMAN	PIMT	25 kDa	0.89	1.2	[]				0	66	15	16	97	#DIV/0!	98	15		113	#DIV/0!
1489	Protein diaphanous homolog 1 OS=Homo sapiens GN=DIAPH1 PE=1 SV=2	DIAP1_HUMAN	DIAP1	141 kDa	0.9	0.9	[]	0	0	0	0	56	34	8	98	#DIV/0!	85	0	0	85	#DIV/0!
29	Dystonin OS=Homo sapiens GN=DST PE=1 SV=4	DYST_HUMAN	DYST	861 kDa	0.12	0.2	[]	0	0	0	0	58	25	16	99	#DIV/0!	14	3	2	19	#DIV/0!
1023	Hematological and neurological expressed 1-like protein OS=Homo sapiens GN=HN1L PE=1 SV=1	HN1L_HUMAN	HN1L	20 kDa	0.65	0.6	[]	0	0	0	0	79	19	2	100	#DIV/0!	51	4	4	59	#DIV/0!
1007	Ras GTPase-activating-like protein IQGAP1 OS=Homo sapiens GN=IQGAP1 PE=1 SV=1	IQGA1_HUMAN	IQGA1	189 kDa	0.64	0.7	[]	0	0	0	0	33	39	28	100	#DIV/0!	65	1	2	68	#DIV/0!
74	Rab-like protein 6 OS=Homo sapiens GN=RABL6 PE=1 SV=2	RABL6_HUMAN	RABL6	80 kDa	0.19	0.3	[]	0			0	47	46	7	100	#DIV/0!	24	4	2	30	#DIV/0!
980	Membrane-associated progesterone receptor component 1 OS=Homo sapiens GN=PGRMC1 PE=1 SV=3	PGRC1_HUMAN	PGRC1	22 kDa	0.63	2	[]				0	86	8	6	100	#DIV/0!	189	13	1	203	#DIV/0!
238	Synapse-associated protein 1 OS=Homo sapiens GN=SYAP1 PE=1 SV=1	SYAP1_HUMAN	SYAP1	40 kDa	0.35	0.5	[]				0	63	29	8	100	#DIV/0!	24	18	4	46	#DIV/0!
15	Golgi-associated PDZ and coiled-coil motif-containing protein OS=Homo sapiens GN=GOPC PE=1 SV=1	GOPC_HUMAN	GOPC	51 kDa	0.087	0.2	[]	0		0	0	54	29	18	101	#DIV/0!	16	6	1	23	#DIV/0!
1150	ATP-binding cassette sub-family D member 3 OS=Homo sapiens GN=ABCD3 PE=1 SV=1	ABCD3_HUMAN	ABCD3	75 kDa	0.71	0.7	[]	0			0	83	17	1	101	#DIV/0!	41	25	2	68	#DIV/0!
1149	Torsin-1A-interacting protein 2 OS=Homo sapiens GN=TOR1AIP2 PE=1 SV=1	TOIP2_HUMAN	TOIP2	51 kDa	0.71	1.2	[]	0			0	51	39	11	101	#DIV/0!	48	61	14	123	#DIV/0!
105	Misshapen-like kinase 1 OS=Homo sapiens GN=MINK1 PE=1 SV=2	MINK1_HUMAN	MINK1	150 kDa	0.24	0.2	[]				0	53	30	18	101	#DIV/0!	25	36		61	#DIV/0!
1540	Protein EFR3 homolog B OS=Homo sapiens GN=EFR3B PE=1 SV=2	EFR3B_HUMAN	EFR3B	92 kDa	0.93	0.9	[]	0		0	0	72	21	9	102	#DIV/0!	4	82	7	93	#DIV/0!
35	Plakophilin-2 OS=Homo sapiens GN=PKP2 PE=1 SV=2	PKP2_HUMAN	PKP2	97 kDa	0.13	0.5	[]		0		0	45	39	18	102	#DIV/0!	23	17	9	49	#DIV/0!
267	Syntaxin-7 OS=Homo sapiens GN=STX7 PE=1 SV=4	STX7_HUMAN	STX7	30 kDa	0.37	0.4	[]				0	63	39	0	102	#DIV/0!	25	15	3	43	#DIV/0!
203	Far upstream element-binding protein 3 OS=Homo sapiens GN=FUBP3 PE=1 SV=2	FUBP3_HUMAN	FUBP3	62 kDa	0.33	2.5	[]	0	0		0	28	63	12	103	#DIV/0!	123		90	213	#DIV/0!
1155	Guanine nucleotide-binding protein G(k) subunit alpha OS=Homo sapiens GN=GNAI3 PE=1 SV=3	GNAI3_HUMAN	GNAI3	41 kDa	0.71	0.7	[]	0			0	57	25	22	104	#DIV/0!	54	13		67	#DIV/0!
1485	Phosphatase and actin regulator 4 OS=Homo sapiens GN=PHACTR4 PE=1 SV=1	PHAR4_HUMAN	PHAR4	78 kDa	0.9	0.9	[]	0			0	75	18	12	105	#DIV/0!	38	50	7	95	#DIV/0!
999	Charged multivesicular body protein 4b OS=Homo sapiens GN=CHMP4B PE=1 SV=1	CHM4B_HUMAN	CHM4B	25 kDa	0.64	0.7	[]		0	0	0	73	32	0	105	#DIV/0!	41	20	9	70	#DIV/0!
1426	Signal recognition particle subunit SRP68 OS=Homo sapiens GN=SRP68 PE=1 SV=2	SRP68_HUMAN	SRP68	71 kDa	0.86	0.8	[]				0	78	16	11	105	#DIV/0!	75	10	2	87	#DIV/0!
747	Cell division cycle-associated protein 3 OS=Homo sapiens GN=CDCA3 PE=1 SV=1	CDCA3_HUMAN	CDCA3	29 kDa	0.52	0.5	[]	0			0	73	23	11	107	#DIV/0!	2	50	2	54	#DIV/0!
1235	Apolipoprotein L2 OS=Homo sapiens GN=APOL2 PE=1 SV=1	APOL2_HUMAN	APOL2	37 kDa	0.75	0.8	[]	0			0	62	42	5	109	#DIV/0!	33	51	3	87	#DIV/0!
1595	Ubiquitin-conjugating enzyme E2 J1 OS=Homo sapiens GN=UBE2J1 PE=1 SV=2	UB2J1_HUMAN	UB2J1	35 kDa	0.96	1	[]	0			0	59	34	16	109	#DIV/0!	23	78	4	105	#DIV/0!
1647	Galactokinase OS=Homo sapiens GN=GALK1 PE=1 SV=1	GALK1_HUMAN	GALK1	42 kDa	0.99	1	[]	0			0	59	32	19	110	#DIV/0!	109	0	2	111	#DIV/0!
1361	Vesicle-associated membrane protein 7 OS=Homo sapiens GN=VAMP7 PE=1 SV=3	VAMP7_HUMAN	VAMP7	25 kDa	0.81	0.8	[]				0	66	35	9	110	#DIV/0!	62	18	13	93	#DIV/0!
1523	Vang-like protein 1 OS=Homo sapiens GN=VANGL1 PE=1 SV=1	VANG1_HUMAN	VANG1	60 kDa	0.92	0.9	[]	0	0		0	73	20	18	111	#DIV/0!	11	82	8	101	#DIV/0!
1136	Equilibrative nucleoside transporter 1 OS=Homo sapiens GN=SLC29A1 PE=1 SV=3	S29A1_HUMAN	S29A1	50 kDa	0.7	0.7	[]				0	72	37	2	111	#DIV/0!	34	42	7	83	#DIV/0!
803	Protein FAM114A2 OS=Homo sapiens GN=FAM114A2 PE=1 SV=4	F1142_HUMAN	F1142	55 kDa	0.54	0.6	[]			0	0	64	48	0	112	#DIV/0!	19	38	14	71	#DIV/0!
768	Rab11 family-interacting protein 5 OS=Homo sapiens GN=RAB11FIP5 PE=1 SV=1	RFIP5_HUMAN	RFIP5	70 kDa	0.53	0.6	[]				0	62	49	1	112	#DIV/0!	13	46	7	66	#DIV/0!
1092	Dedicator of cytokinesis protein 7 OS=Homo sapiens GN=DOCK7 PE=1 SV=4	DOCK7_HUMAN	DOCK7	243 kDa	0.68	0.5	[]	0	0	0	0	107	3	3	113	#DIV/0!	58	2	0	60	#DIV/0!
30	Golgin subfamily A member 4 OS=Homo sapiens GN=GOLGA4 PE=1 SV=1	GOGA4_HUMAN	GOGA4	261 kDa	0.12	0.1	[]	0	0	0	0	61	45	7	113	#DIV/0!	10	3	3	16	#DIV/0!
757	Coatomer subunit gamma-2 OS=Homo sapiens GN=COPG2 PE=1 SV=1	COPG2_HUMAN	COPG2	98 kDa	0.52	1.7	[]	0			0	55	41	17	113	#DIV/0!	138	35	21	194	#DIV/0!
186	Ephrin type-B receptor 4 OS=Homo sapiens GN=EPHB4 PE=1 SV=2	EPHB4_HUMAN	EPHB4	108 kDa	0.32	0.4	[]				0	63	32	18	113	#DIV/0!	37	30		67	#DIV/0!
131	Pleckstrin homology domain-containing family A member 1 OS=Homo sapiens GN=PLEKHA1 PE=1 SV=2	PKHA1_HUMAN	PKHA1	46 kDa	0.28	0.4	[]	0			0	71	22	21	114	#DIV/0!	15	28	4	47	#DIV/0!
1625	Pyridoxal-dependent decarboxylase domain-containing protein 1 OS=Homo sapiens GN=PDXDC1 PE=1 SV=2	PDXD1_HUMAN	PDXD1	87 kDa	0.98	1	[]		0	0	0	81	24	9	114	#DIV/0!	45	53	14	112	#DIV/0!
1091	tRNA (cytosine(34)-C(5))-methyltransferase OS=Homo sapiens GN=NSUN2 PE=1 SV=2	NSUN2_HUMAN	NSUN2	86 kDa	0.68	1.5	[]	0	0	0	0	54	29	32	115	#DIV/0!	151	2	25	178	#DIV/0!
197	MAGUK p55 subfamily member 7 OS=Homo sapiens GN=MPP7 PE=1 SV=1	MPP7_HUMAN	MPP7	66 kDa	0.33	0.2	[]		0		0	90	18	7	115	#DIV/0!	9	17		26	#DIV/0!
917	Zinc finger protein-like 1 OS=Homo sapiens GN=ZFPL1 PE=1 SV=2	ZFPL1_HUMAN	ZFPL1	34 kDa	0.6	0.6	[]				0	86	24	6	116	#DIV/0!	43	22	6	71	#DIV/0!
1638	Protein FAM83B OS=Homo sapiens GN=FAM83B PE=1 SV=1	FA83B_HUMAN	FA83B	115 kDa	0.99	1	[]	0			0	85	14	18	117	#DIV/0!	12	105	2	119	#DIV/0!
1364	Leucine-rich repeat transmembrane protein FLRT2 OS=Homo sapiens GN=FLRT2 PE=1 SV=1	FLRT2_HUMAN	FLRT2	74 kDa	0.82	0.9	[]	0			0	72	28	17	117	#DIV/0!	25	64	11	100	#DIV/0!
503	Cytoskeleton-associated protein 5 OS=Homo sapiens GN=CKAP5 PE=1 SV=3	CKAP5_HUMAN	CKAP5	226 kDa	0.42	2.5	[]	0	0	0	0	72	28	18	118	#DIV/0!	218	17	55	290	#DIV/0!
886	Manganese-transporting ATPase 13A1 OS=Homo sapiens GN=ATP13A1 PE=1 SV=2	AT131_HUMAN	AT131	133 kDa	0.59	1.7	[]	0			0	71	39	8	118	#DIV/0!	35	145	16	196	#DIV/0!
1049	DnaJ homolog subfamily C member 7 OS=Homo sapiens GN=DNAJC7 PE=1 SV=2	DNJC7_HUMAN	DNJC7	56 kDa	0.66	0.5	[]	0		0	0	109	4	7	120	#DIV/0!	60		4	64	#DIV/0!
1269	ADP-ribosylation factor 4 OS=Homo sapiens GN=ARF4 PE=1 SV=3	ARF4_HUMAN	ARF4	21 kDa	0.77	1.6	[]	0			0	114		6	120	#DIV/0!	184		4	188	#DIV/0!
123	Partitioning defective 3 homolog OS=Homo sapiens GN=PARD3 PE=1 SV=2	PARD3_HUMAN	PARD3	151 kDa	0.27	0.4	[]	0	0	0	0	70	34	17	121	#DIV/0!	35	13	3	51	#DIV/0!
466	Cytoplasmic protein NCK1 OS=Homo sapiens GN=NCK1 PE=1 SV=1	NCK1_HUMAN	NCK1	43 kDa	0.41	0.3	[]	0		0	0	102	16	3	121	#DIV/0!	18	14	2	34	#DIV/0!
1326	Sodium-coupled neutral amino acid transporter 2 OS=Homo sapiens GN=SLC38A2 PE=1 SV=2	S38A2_HUMAN	S38A2	56 kDa	0.79	1.2	[]	0			0	83	28	10	121	#DIV/0!	45	99	6	150	#DIV/0!
1142	GTP-binding protein SAR1a OS=Homo sapiens GN=SAR1A PE=1 SV=1	SAR1A_HUMAN	SAR1A	22 kDa	0.71	1.4	[]		0		0	74	32	15	121	#DIV/0!	117	36	12	165	#DIV/0!
779	Tight junction protein ZO-1 OS=Homo sapiens GN=TJP1 PE=1 SV=3	ZO1_HUMAN	ZO1	195 kDa	0.53	0.5	[]	0	0	0	0	97	24	1	122	#DIV/0!	45	10	2	57	#DIV/0!
1039	Ancient ubiquitous protein 1 OS=Homo sapiens GN=AUP1 PE=1 SV=1	AUP1_HUMAN	AUP1	53 kDa	0.66	1.4	[]				0	76	43	3	122	#DIV/0!	82	81	6	169	#DIV/0!
226	Ras-related protein Rab-11B OS=Homo sapiens GN=RAB11B PE=1 SV=4	RB11B_HUMAN	RB11B	24 kDa	0.34	0.6	[]				0	63	35	24	122	#DIV/0!	22	43	6	71	#DIV/0!
1413	2',3'-cyclic-nucleotide 3'-phosphodiesterase OS=Homo sapiens GN=CNP PE=1 SV=2	CN37_HUMAN	CN37	48 kDa	0.85	0.8	[]	0	0	0	0	103	3	19	125	#DIV/0!	88	12	0	100	#DIV/0!
688	Serpin H1 OS=Homo sapiens GN=SERPINH1 PE=1 SV=2	SERPH_HUMAN	SERPH	46 kDa	0.49	0.6	[]	0	0	0	0	49	47	30	126	#DIV/0!	66	3	10	79	#DIV/0!
128	Ephrin-B1 OS=Homo sapiens GN=EFNB1 PE=1 SV=1	EFNB1_HUMAN	EFNB1	38 kDa	0.28	0.4	[]	0			0	77	33	16	126	#DIV/0!	6	36	6	48	#DIV/0!
224	Junctional adhesion molecule C OS=Homo sapiens GN=JAM3 PE=1 SV=1	JAM3_HUMAN	JAM3	35 kDa	0.34	0.5	[]		0	0	0	73	43	10	126	#DIV/0!	18	34	11	63	#DIV/0!
833	Ran GTPase-activating protein 1 OS=Homo sapiens GN=RANGAP1 PE=1 SV=1	RAGP1_HUMAN	RAGP1	64 kDa	0.56	1.6	[]	0	0	0	0	82	29	16	127	#DIV/0!	141	34	31	206	#DIV/0!
1167	Sarcoplasmic/endoplasmic reticulum calcium ATPase 2 OS=Homo sapiens GN=ATP2A2 PE=1 SV=1	AT2A2_HUMAN	AT2A2	115 kDa	0.72	1.6	[]	0	0		0	64	46	17	127	#DIV/0!	183	5	9	197	#DIV/0!
1594	7-dehydrocholesterol reductase OS=Homo sapiens GN=DHCR7 PE=1 SV=1	DHCR7_HUMAN	DHCR7	54 kDa	0.96	1	[]				0	64	47	16	127	#DIV/0!	52	59	19	130	#DIV/0!
130	AP-2 complex subunit mu OS=Homo sapiens GN=AP2M1 PE=1 SV=2	AP2M1_HUMAN	AP2M1	50 kDa	0.28	0.3	[]	0	0	0	0	83	36	9	128	#DIV/0!	8	29	5	42	#DIV/0!
701	Brain-specific angiogenesis inhibitor 1-associated protein 2-like protein 1 OS=Homo sapiens GN=BAIAP2L1 PE=1 SV=2	BI2L1_HUMAN	BI2L1	57 kDa	0.5	0.6	[]	0	0	0	0	85	24	19	128	#DIV/0!	36	34	6	76	#DIV/0!
1082	Guanine nucleotide-binding protein G(i) subunit alpha-2 OS=Homo sapiens GN=GNAI2 PE=1 SV=3	GNAI2_HUMAN	GNAI2	40 kDa	0.68	0.7	[]	0			0	77	29	22	128	#DIV/0!	70	13	11	94	#DIV/0!
1313	Band 4.1-like protein 5 OS=Homo sapiens GN=EPB41L5 PE=1 SV=3	E41L5_HUMAN	E41L5	82 kDa	0.79	0.8	[]	0			0	102	21	6	129	#DIV/0!	31	66	2	99	#DIV/0!
775	Stromal interaction molecule 1 OS=Homo sapiens GN=STIM1 PE=1 SV=3	STIM1_HUMAN	STIM1	77 kDa	0.53	0.7	[]		0	0	0	65	52	12	129	#DIV/0!	34	49	3	86	#DIV/0!
1644	Arginine--tRNA ligase, cytoplasmic OS=Homo sapiens GN=RARS PE=1 SV=2	SYRC_HUMAN	SYRC	75 kDa	0.99	1	[]			0	0	60	46	24	130	#DIV/0!	105	15	9	129	#DIV/0!
1473	Nucleoporin NDC1 OS=Homo sapiens GN=NDC1 PE=1 SV=2	NDC1_HUMAN	NDC1	76 kDa	0.89	0.9	[]				0	62	47	21	130	#DIV/0!	34	71	16	121	#DIV/0!
1095	TRAF2 and NCK-interacting protein kinase OS=Homo sapiens GN=TNIK PE=1 SV=1	TNIK_HUMAN	TNIK	155 kDa	0.68	0.8	[]	0			0	69	45	17	131	#DIV/0!	43	48	9	100	#DIV/0!
613	Syntaxin-3 OS=Homo sapiens GN=STX3 PE=1 SV=3	STX3_HUMAN	STX3	33 kDa	0.46	0.7	[]	0			0	53	67	12	132	#DIV/0!	41	33	12	86	#DIV/0!
1514	Sorting nexin-3 OS=Homo sapiens GN=SNX3 PE=1 SV=3	SNX3_HUMAN	SNX3	19 kDa	0.91	0.8	[]				0	132	0		132	#DIV/0!	107	5	0	112	#DIV/0!
205	Protocadherin-9 OS=Homo sapiens GN=PCDH9 PE=1 SV=2	PCDH9_HUMAN	PCDH9	136 kDa	0.33	0.5	[]	0	0		0	57	61	15	133	#DIV/0!	5	53	2	60	#DIV/0!
1106	MKL/myocardin-like protein 2 OS=Homo sapiens GN=MKL2 PE=1 SV=3	MKL2_HUMAN	MKL2	118 kDa	0.69	0.7	[]	0			0	103	13	17	133	#DIV/0!	58	25	7	90	#DIV/0!
240	Neogenin OS=Homo sapiens GN=NEO1 PE=1 SV=2	NEO1_HUMAN	NEO1	160 kDa	0.35	0.4	[]	0		0	0	60	73	1	134	#DIV/0!	2	47	0	49	#DIV/0!
25	G protein-regulated inducer of neurite outgrowth 1 OS=Homo sapiens GN=GPRIN1 PE=2 SV=2	GRIN1_HUMAN	GRIN1	102 kDa	0.11	0.2	[]	0	0	0	0	48	74	13	135	#DIV/0!	5	10	10	25	#DIV/0!
469	RuvB-like 1 OS=Homo sapiens GN=RUVBL1 PE=1 SV=1	RUVB1_HUMAN	RUVB1	50 kDa	0.41	1.6	[]		0		0	72	45	18	135	#DIV/0!	120	54	41	215	#DIV/0!
586	Signal peptidase complex subunit 2 OS=Homo sapiens GN=SPCS2 PE=1 SV=3	SPCS2_HUMAN	SPCS2	25 kDa	0.45	1.4	[]	0	0		0	74	39	23	136	#DIV/0!	64	95	35	194	#DIV/0!
55	Sorting nexin-6 OS=Homo sapiens GN=SNX6 PE=1 SV=1	SNX6_HUMAN	SNX6	47 kDa	0.16	0.4	[]	0	0		0	61	53	23	137	#DIV/0!	15	38	8	61	#DIV/0!
952	Structural maintenance of chromosomes protein 2 OS=Homo sapiens GN=SMC2 PE=1 SV=2	SMC2_HUMAN	SMC2	136 kDa	0.62	1.8	[]	0		0	0	40	29	68	137	#DIV/0!	223	0	29	252	#DIV/0!
1353	60S ribosomal protein L5 OS=Homo sapiens GN=RPL5 PE=1 SV=3	RL5_HUMAN	RL5	34 kDa	0.81	0.8	[]	0	0	0	0	15	105	19	139	#DIV/0!	70	2	40	112	#DIV/0!
1130	Leucine-rich repeat-containing protein 59 OS=Homo sapiens GN=LRRC59 PE=1 SV=1	LRC59_HUMAN	LRC59	35 kDa	0.7	1.3	[]	0			0	77	51	11	139	#DIV/0!	108	57	15	180	#DIV/0!
993	Acyl-protein thioesterase 2 OS=Homo sapiens GN=LYPLA2 PE=1 SV=1	LYPA2_HUMAN	LYPA2	25 kDa	0.64	1.3	[]	0			0	88	42	9	139	#DIV/0!	87	78	21	186	#DIV/0!
262	MARCKS-related protein OS=Homo sapiens GN=MARCKSL1 PE=1 SV=2	MRP_HUMAN	MRP	20 kDa	0.37	0.6	[]				0	67	58	14	139	#DIV/0!	35	38	8	81	#DIV/0!
771	Nucleolar RNA helicase 2 OS=Homo sapiens GN=DDX21 PE=1 SV=5	DDX21_HUMAN	DDX21	87 kDa	0.53	0.6	[]	0	0	0	0	15	92	34	141	#DIV/0!	65	0	13	78	#DIV/0!
406	Casein kinase I isoform gamma-3 OS=Homo sapiens GN=CSNK1G3 PE=1 SV=2	KC1G3_HUMAN	KC1G3	51 kDa	0.39	0.3	[]	0	0		0	111	20	10	141	#DIV/0!	22	23	1	46	#DIV/0!
1391	Oxysterol-binding protein-related protein 8 OS=Homo sapiens GN=OSBPL8 PE=1 SV=3	OSBL8_HUMAN	OSBL8	101 kDa	0.84	1.2	[]	0		0	0	94	26	21	141	#DIV/0!	86	69	8	163	#DIV/0!
1225	Surfeit locus protein 4 OS=Homo sapiens GN=SURF4 PE=1 SV=3	SURF4_HUMAN	SURF4	30 kDa	0.75	1.2	[]		0		0	65	45	31	141	#DIV/0!	90	58	17	165	#DIV/0!
1220	Epidermal growth factor receptor substrate 15-like 1 OS=Homo sapiens GN=EPS15L1 PE=1 SV=1	EP15R_HUMAN	EP15R	94 kDa	0.75	0.8	[]	0		0	0	73	63	6	142	#DIV/0!	47	60	8	115	#DIV/0!
254	Retinoic acid-induced protein 3 OS=Homo sapiens GN=GPRC5A PE=1 SV=2	RAI3_HUMAN	RAI3	40 kDa	0.36	0.5	[]	0		0	0	68	65	9	142	#DIV/0!	23	44	7	74	#DIV/0!
424	Hamartin OS=Homo sapiens GN=TSC1 PE=1 SV=2	TSC1_HUMAN	TSC1	130 kDa	0.4	0.3	[]	0			0	104	26	12	142	#DIV/0!	48	1	0	49	#DIV/0!
180	Ephrin-B2 OS=Homo sapiens GN=EFNB2 PE=1 SV=1	EFNB2_HUMAN	EFNB2	37 kDa	0.32	0.3	[]	0	0	0	0	105	29	9	143	#DIV/0!	18	20	3	41	#DIV/0!
941	Minor histocompatibility antigen H13 OS=Homo sapiens GN=HM13 PE=1 SV=1	HM13_HUMAN	HM13	41 kDa	0.61	1.4	[]	0			0	75	63	5	143	#DIV/0!	83	103	14	200	#DIV/0!
875	Sodium- and chloride-dependent creatine transporter 1 OS=Homo sapiens GN=SLC6A8 PE=1 SV=1	SC6A8_HUMAN	SC6A8	71 kDa	0.58	1.6	[]				0	31	72	40	143	#DIV/0!	24	160	39	223	#DIV/0!
1331	Ezrin OS=Homo sapiens GN=EZR PE=1 SV=4	EZRI_HUMAN	EZRI	69 kDa	0.8	1.2	[]	0	0	0	0	88	45	11	144	#DIV/0!	50	114	11	175	#DIV/0!
87	Kinesin light chain 2 OS=Homo sapiens GN=KLC2 PE=1 SV=1	KLC2_HUMAN	KLC2	69 kDa	0.22	0.4	[]	0			0	74	50	22	146	#DIV/0!	45	12	0	57	#DIV/0!
517	RELT-like protein 1 OS=Homo sapiens GN=RELL1 PE=1 SV=1	RELL1_HUMAN	RELL1	29 kDa	0.42	0.5	[]				0	99	41	7	147	#DIV/0!	45	18	6	69	#DIV/0!
867	Spartin OS=Homo sapiens GN=SPG20 PE=1 SV=1	SPG20_HUMAN	SPG20	73 kDa	0.58	0.6	[]	0			0	114	30	5	149	#DIV/0!	61	12	9	82	#DIV/0!
1503	Golgi resident protein GCP60 OS=Homo sapiens GN=ACBD3 PE=1 SV=4	GCP60_HUMAN	GCP60	61 kDa	0.9	0.9	[]	0		0	0	89	44	21	154	#DIV/0!	70	59	15	144	#DIV/0!
734	Myelin protein zero-like protein 1 OS=Homo sapiens GN=MPZL1 PE=1 SV=1	MPZL1_HUMAN	MPZL1	29 kDa	0.51	0.7	[]	0			0	57	75	22	154	#DIV/0!	17	67	22	106	#DIV/0!
1621	Structural maintenance of chromosomes protein 1A OS=Homo sapiens GN=SMC1A PE=1 SV=2	SMC1A_HUMAN	SMC1A	143 kDa	0.97	1	[]	0	0	0	0	25	103	27	155	#DIV/0!	135	0	15	150	#DIV/0!
1203	Eukaryotic translation initiation factor 4B OS=Homo sapiens GN=EIF4B PE=1 SV=2	IF4B_HUMAN	IF4B	69 kDa	0.74	1.2	[]	0			0	84	62	9	155	#DIV/0!	99	80	13	192	#DIV/0!
175	Dehydrogenase/reductase SDR family member 7 OS=Homo sapiens GN=DHRS7 PE=1 SV=1	DHRS7_HUMAN	DHRS7	38 kDa	0.31	0.6	[]				0	69	67	19	155	#DIV/0!	31	41	24	96	#DIV/0!
1125	Utrophin OS=Homo sapiens GN=UTRN PE=1 SV=2	UTRO_HUMAN	UTRO	394 kDa	0.7	0.6	[]	0	0	0	0	144	6	7	157	#DIV/0!	88	1	0	89	#DIV/0!
644	Heat shock protein 105 kDa OS=Homo sapiens GN=HSPH1 PE=1 SV=1	HS105_HUMAN	HS105	97 kDa	0.48	2.8	[]	0			0	63	57	38	158	#DIV/0!	391	11	43	445	#DIV/0!
1219	Emerin OS=Homo sapiens GN=EMD PE=1 SV=1	EMD_HUMAN	EMD	29 kDa	0.75	1.2	[]				0	89	54	15	158	#DIV/0!	70	109	15	194	#DIV/0!
976	Rapamycin-insensitive companion of mTOR OS=Homo sapiens GN=RICTOR PE=1 SV=1	RICTR_HUMAN	RICTR	192 kDa	0.63	0.6	[]	0	0	0	0	138	16	5	159	#DIV/0!	32	55	1	88	#DIV/0!
1634	Multidrug resistance-associated protein 5 OS=Homo sapiens GN=ABCC5 PE=1 SV=2	MRP5_HUMAN	MRP5	161 kDa	0.98	1	[]			0	0	64	72	23	159	#DIV/0!	32	112	17	161	#DIV/0!
1071	Zinc transporter 1 OS=Homo sapiens GN=SLC30A1 PE=1 SV=3	ZNT1_HUMAN	ZNT1	55 kDa	0.67	0.6	[]	0			0	131	21	9	161	#DIV/0!	76	23	1	100	#DIV/0!
61	Cytospin-B OS=Homo sapiens GN=SPECC1 PE=1 SV=1	CYTSB_HUMAN	CYTSB	119 kDa	0.17	0.3	[]	0	0	0	0	78	73	11	162	#DIV/0!	20	28	7	55	#DIV/0!
206	G-protein coupled receptor family C group 5 member C OS=Homo sapiens GN=GPRC5C PE=1 SV=2	GPC5C_HUMAN	GPC5C	48 kDa	0.33	0.4	[]	0	0		0	55	93	16	164	#DIV/0!	5	59	6	70	#DIV/0!
1614	Adapter molecule crk OS=Homo sapiens GN=CRK PE=1 SV=2	CRK_HUMAN	CRK	34 kDa	0.97	1	[]	0		0	0	122	36	6	164	#DIV/0!	95	52	12	159	#DIV/0!
953	WW domain-containing oxidoreductase OS=Homo sapiens GN=WWOX PE=1 SV=1	WWOX_HUMAN	WWOX	47 kDa	0.62	0.7	[]	0			0	62	73	29	164	#DIV/0!	11	87	22	120	#DIV/0!
1347	UBX domain-containing protein 4 OS=Homo sapiens GN=UBXN4 PE=1 SV=2	UBXN4_HUMAN	UBXN4	57 kDa	0.81	0.9	[]		0	0	0	70	71	23	164	#DIV/0!	25	91	27	143	#DIV/0!
200	Zinc finger FYVE domain-containing protein 16 OS=Homo sapiens GN=ZFYVE16 PE=1 SV=3	ZFY16_HUMAN	ZFY16	169 kDa	0.33	0.5	[]	0			0	100	49	16	165	#DIV/0!	41	31	3	75	#DIV/0!
170	EH domain-containing protein 1 OS=Homo sapiens GN=EHD1 PE=1 SV=2	EHD1_HUMAN	EHD1	61 kDa	0.31	0.5	[]	0	0	0	0	107	34	26	167	#DIV/0!	30	22	25	77	#DIV/0!
1386	Junctional adhesion molecule A OS=Homo sapiens GN=F11R PE=1 SV=1	JAM1_HUMAN	JAM1	33 kDa	0.84	0.9	[]			0	0	101	58	9	168	#DIV/0!	76	60	10	146	#DIV/0!
1315	EF-hand domain-containing protein D2 OS=Homo sapiens GN=EFHD2 PE=1 SV=1	EFHD2_HUMAN	EFHD2	27 kDa	0.79	0.9	[]				0	83	76	9	168	#DIV/0!	60	67	17	144	#DIV/0!
45	Kinesin light chain 1 OS=Homo sapiens GN=KLC1 PE=1 SV=2	KLC1_HUMAN	KLC1	65 kDa	0.15	0.4	[]	0	0		0	84	58	27	169	#DIV/0!	44	19	0	63	#DIV/0!
1603	Eukaryotic translation initiation factor 5 OS=Homo sapiens GN=EIF5 PE=1 SV=2	IF5_HUMAN	IF5	49 kDa	0.96	1	[]	0			0	108	39	22	169	#DIV/0!	71	84	9	164	#DIV/0!
465	Gap junction alpha-1 protein OS=Homo sapiens GN=GJA1 PE=1 SV=2	CXA1_HUMAN	CXA1	43 kDa	0.41	0.2	[]				0	154	15	2	171	#DIV/0!	2	31		33	#DIV/0!
908	Rab11 family-interacting protein 1 OS=Homo sapiens GN=RAB11FIP1 PE=1 SV=3	RFIP1_HUMAN	RFIP1	137 kDa	0.6	0.6	[]	0	0	0	0	127	39	6	172	#DIV/0!	55	41	10	106	#DIV/0!
1624	Ragulator complex protein LAMTOR1 OS=Homo sapiens GN=LAMTOR1 PE=1 SV=2	LTOR1_HUMAN	LTOR1	18 kDa	0.98	1	[]				0	172			172	#DIV/0!	169	10		179	#DIV/0!
632	Kinase D-interacting substrate of 220 kDa OS=Homo sapiens GN=KIDINS220 PE=1 SV=3	KDIS_HUMAN	KDIS	197 kDa	0.47	0.3	[]	0	0		0	155	10	8	173	#DIV/0!	45	3	3	51	#DIV/0!
1581	Annexin A1 OS=Homo sapiens GN=ANXA1 PE=1 SV=2	ANXA1_HUMAN	ANXA1	39 kDa	0.95	1	[]	0			0	91	73	10	174	#DIV/0!	93	53	22	168	#DIV/0!
607	Serine/threonine-protein kinase PAK 4 OS=Homo sapiens GN=PAK4 PE=1 SV=1	PAK4_HUMAN	PAK4	64 kDa	0.45	0.5	[]	0	0	0	0	118	53	4	175	#DIV/0!	29	55	0	84	#DIV/0!
666	Syntaxin-5 OS=Homo sapiens GN=STX5 PE=1 SV=2	STX5_HUMAN	STX5	40 kDa	0.49	0.5	[]	0	0		0	115	51	10	176	#DIV/0!	21	70	0	91	#DIV/0!
1482	TIP41-like protein OS=Homo sapiens GN=TIPRL PE=1 SV=2	TIPRL_HUMAN	TIPRL	31 kDa	0.89	1.1	[]	0		0	0	126	33	17	176	#DIV/0!	86	93	15	194	#DIV/0!
1279	Crk-like protein OS=Homo sapiens GN=CRKL PE=1 SV=1	CRKL_HUMAN	CRKL	34 kDa	0.77	0.8	[]	0	0	0	0	122	50	5	177	#DIV/0!	81	53	5	139	#DIV/0!
944	Importin subunit beta-1 OS=Homo sapiens GN=KPNB1 PE=1 SV=2	IMB1_HUMAN	IMB1	97 kDa	0.61	1.7	[]	0	0		0	87	65	25	177	#DIV/0!	231		63	294	#DIV/0!
1561	Serine/threonine-protein kinase 10 OS=Homo sapiens GN=STK10 PE=1 SV=1	STK10_HUMAN	STK10	112 kDa	0.94	0.9	[]	0		0	0	77	90	10	177	#DIV/0!	38	124	9	171	#DIV/0!
740	Mitogen-activated protein kinase kinase kinase kinase 4 OS=Homo sapiens GN=MAP4K4 PE=1 SV=2	M4K4_HUMAN	M4K4	142 kDa	0.51	0.6	[]	0	0	0	0	119	39	20	178	#DIV/0!	53	44	10	107	#DIV/0!
788	Serine palmitoyltransferase 1 OS=Homo sapiens GN=SPTLC1 PE=1 SV=1	SPTC1_HUMAN	SPTC1	53 kDa	0.54	0.5	[]	0			0	138	15	25	178	#DIV/0!	74	2	10	86	#DIV/0!
1582	Ras-related protein Rab-13 OS=Homo sapiens GN=RAB13 PE=1 SV=1	RAB13_HUMAN	RAB13	23 kDa	0.95	1	[]				0	115	41	23	179	#DIV/0!	109	56	21	186	#DIV/0!
375	Protein CIP2A OS=Homo sapiens GN=KIAA1524 PE=1 SV=2	CIP2A_HUMAN	CIP2A	102 kDa	0.37	0.5	[]	0	0		0	99	62	19	180	#DIV/0!	66	11	16	93	#DIV/0!
949	Nuclear migration protein nudC OS=Homo sapiens GN=NUDC PE=1 SV=1	NUDC_HUMAN	NUDC	38 kDa	0.62	1.3	[]	0	0		0	75	77	28	180	#DIV/0!	87	116	27	230	#DIV/0!
533	Vigilin OS=Homo sapiens GN=HDLBP PE=1 SV=2	VIGLN_HUMAN	VIGLN	141 kDa	0.43	2.1	[]	0	0	0	0	43	120	19	182	#DIV/0!	263	42	75	380	#DIV/0!
95	Flotillin-2 OS=Homo sapiens GN=FLOT2 PE=1 SV=2	FLOT2_HUMAN	FLOT2	47 kDa	0.23	0.3	[]		0		0	115	40	27	182	#DIV/0!	7	41	8	56	#DIV/0!
59	EH domain-binding protein 1 OS=Homo sapiens GN=EHBP1 PE=1 SV=3	EHBP1_HUMAN	EHBP1	140 kDa	0.16	0.5	[]	0	0		0	69	80	34	183	#DIV/0!	51	28	14	93	#DIV/0!
1438	Ras-related protein Rab-35 OS=Homo sapiens GN=RAB35 PE=1 SV=1	RAB35_HUMAN	RAB35	23 kDa	0.87	1.1	[]	0			0	121	47	19	187	#DIV/0!	115	66	23	204	#DIV/0!
559	Cold shock domain-containing protein E1 OS=Homo sapiens GN=CSDE1 PE=1 SV=2	CSDE1_HUMAN	CSDE1	89 kDa	0.43	1.9	[]	0	0		0	94	69	25	188	#DIV/0!	238	72	44	354	#DIV/0!
1101	DEP domain-containing protein 1B OS=Homo sapiens GN=DEPDC1B PE=1 SV=2	DEP1B_HUMAN	DEP1B	62 kDa	0.68	0.7	[]	0	0	0	0	110	12	69	191	#DIV/0!	10	118	1	129	#DIV/0!
748	Lipolysis-stimulated lipoprotein receptor OS=Homo sapiens GN=LSR PE=1 SV=4	LSR_HUMAN	LSR	71 kDa	0.52	0.6	[]	0			0	116	47	30	193	#DIV/0!	29	85	3	117	#DIV/0!
1006	Ras-related protein Rab-8B OS=Homo sapiens GN=RAB8B PE=1 SV=2	RAB8B_HUMAN	RAB8B	24 kDa	0.64	1.3	[]	0			0	117	77		194	#DIV/0!	109	108	39	256	#DIV/0!
1264	Lethal(2) giant larvae protein homolog 1 OS=Homo sapiens GN=LLGL1 PE=1 SV=3	L2GL1_HUMAN	L2GL1	115 kDa	0.77	1.2	[]		0		0	100	65	30	195	#DIV/0!	57	157	24	238	#DIV/0!
83	ADP-ribosylation factor-like protein 13B OS=Homo sapiens GN=ARL13B PE=1 SV=1	AR13B_HUMAN	AR13B	49 kDa	0.21	0.5	[]	0			0	95	72	33	200	#DIV/0!	16	62	15	93	#DIV/0!
823	Palmitoyltransferase ZDHHC5 OS=Homo sapiens GN=ZDHHC5 PE=1 SV=2	ZDHC5_HUMAN	ZDHC5	78 kDa	0.55	0.6	[]				0	131	65	6	202	#DIV/0!	54	62	9	125	#DIV/0!
174	Secretory carrier-associated membrane protein 3 OS=Homo sapiens GN=SCAMP3 PE=1 SV=3	SCAM3_HUMAN	SCAM3	38 kDa	0.31	0.5	[]				0	94	96	14	204	#DIV/0!	50	35	21	106	#DIV/0!
1567	PDZ and LIM domain protein 1 OS=Homo sapiens GN=PDLIM1 PE=1 SV=4	PDLI1_HUMAN	PDLI1	36 kDa	0.94	1	[]	0			0	125	71	9	205	#DIV/0!	123	41	31	195	#DIV/0!
1552	Charged multivesicular body protein 2b OS=Homo sapiens GN=CHMP2B PE=1 SV=1	CHM2B_HUMAN	CHM2B	24 kDa	0.93	1	[]				0	123	63	19	205	#DIV/0!	58	107	30	195	#DIV/0!
983	Ras-related protein Rab-8A OS=Homo sapiens GN=RAB8A PE=1 SV=1	RAB8A_HUMAN	RAB8A	24 kDa	0.63	1.3	[]				0	105	78	22	205	#DIV/0!	124	96	39	259	#DIV/0!
1305	Very-long-chain (3R)-3-hydroxyacyl-CoA dehydratase 3 OS=Homo sapiens GN=HACD3 PE=1 SV=2	HACD3_HUMAN	HACD3	43 kDa	0.78	1.2	[]	0			0	96	80	30	206	#DIV/0!	148	69	25	242	#DIV/0!
50	Unconventional myosin-VI OS=Homo sapiens GN=MYO6 PE=1 SV=4	MYO6_HUMAN	MYO6	150 kDa	0.16	0.4	[]	0	0	0	0	84	73	50	207	#DIV/0!	70	13	5	88	#DIV/0!
1173	Plasminogen activator inhibitor 1 RNA-binding protein OS=Homo sapiens GN=SERBP1 PE=1 SV=2	PAIRB_HUMAN	PAIRB	45 kDa	0.72	0.8	[]	0			0	109	63	36	208	#DIV/0!	100	57	13	170	#DIV/0!
979	Translational activator GCN1 OS=Homo sapiens GN=GCN1L1 PE=1 SV=6	GCN1L_HUMAN	GCN1L	293 kDa	0.63	1.9	[]	0		0	0	127	54	28	209	#DIV/0!	371	1	28	400	#DIV/0!
502	Proto-oncogene tyrosine-protein kinase Src OS=Homo sapiens GN=SRC PE=1 SV=3	SRC_HUMAN	SRC	60 kDa	0.42	0.8	[]	0		0	0	94	67	49	210	#DIV/0!	56	74	36	166	#DIV/0!
1116	Folate transporter 1 OS=Homo sapiens GN=SLC19A1 PE=1 SV=3	S19A1_HUMAN	S19A1	65 kDa	0.69	0.8	[]				0	46	125	39	210	#DIV/0!	46	92	29	167	#DIV/0!
11	Epidermal growth factor receptor OS=Homo sapiens GN=EGFR PE=1 SV=2	EGFR_HUMAN	EGFR	134 kDa	0.08	0.2	[]	0	0		0	70	112	36	218	#DIV/0!	17	33	0	50	#DIV/0!
1195	40S ribosomal protein S2 OS=Homo sapiens GN=RPS2 PE=1 SV=2	RS2_HUMAN	RS2	31 kDa	0.73	0.8	[]	0		0	0	123	64	31	218	#DIV/0!	127	6	35	168	#DIV/0!
1444	ADP-ribosylation factor 1 OS=Homo sapiens GN=ARF1 PE=1 SV=2	ARF1_HUMAN	ARF1	21 kDa	0.87	1.3	[]				0	215	0	4	219	#DIV/0!	274	4	1	279	#DIV/0!
1615	Vesicle-associated membrane protein 3 OS=Homo sapiens GN=VAMP3 PE=1 SV=3	VAMP3_HUMAN	VAMP3	11 kDa	0.97	1	[]				0	216	2	2	220	#DIV/0!	197	28	6	231	#DIV/0!
982	Long-chain-fatty-acid--CoA ligase 3 OS=Homo sapiens GN=ACSL3 PE=1 SV=3	ACSL3_HUMAN	ACSL3	80 kDa	0.63	1.4	[]	0	0	0	0	162	51	14	227	#DIV/0!	138	163	22	323	#DIV/0!
1000	Oxysterol-binding protein-related protein 9 OS=Homo sapiens GN=OSBPL9 PE=1 SV=2	OSBL9_HUMAN	OSBL9	83 kDa	0.64	0.5	[]	0			0	193	31	3	227	#DIV/0!	111	7	5	123	#DIV/0!
1017	Fatty aldehyde dehydrogenase OS=Homo sapiens GN=ALDH3A2 PE=1 SV=1	AL3A2_HUMAN	AL3A2	55 kDa	0.65	0.8	[]	0	0	0	0	138	60	32	230	#DIV/0!	73	86	14	173	#DIV/0!
1517	Tyrosine-protein phosphatase non-receptor type 1 OS=Homo sapiens GN=PTPN1 PE=1 SV=1	PTN1_HUMAN	PTN1	50 kDa	0.91	0.9	[]		0	0	0	124	62	45	231	#DIV/0!	81	118	19	218	#DIV/0!
1480	40S ribosomal protein S3a OS=Homo sapiens GN=RPS3A PE=1 SV=2	RS3A_HUMAN	RS3A	30 kDa	0.89	0.9	[]		0	0	0	108	96	30	234	#DIV/0!	173	2	34	209	#DIV/0!
1265	H(+)/Cl(-) exchange transporter 7 OS=Homo sapiens GN=CLCN7 PE=1 SV=2	CLCN7_HUMAN	CLCN7	89 kDa	0.77	1.2	[]	0	0	0	0	116	103	17	236	#DIV/0!	108	152	23	283	#DIV/0!
925	Band 4.1-like protein 1 OS=Homo sapiens GN=EPB41L1 PE=1 SV=2	E41L1_HUMAN	E41L1	99 kDa	0.61	0.7	[]	0	0	0	0	116	100	20	236	#DIV/0!	41	76	18	135	#DIV/0!
668	Coiled-coil domain-containing protein 8 OS=Homo sapiens GN=CCDC8 PE=1 SV=2	CCDC8_HUMAN	CCDC8	59 kDa	0.49	0.5	[]	0			0	175	51	11	237	#DIV/0!	74	37	3	114	#DIV/0!
1588	Cell surface glycoprotein MUC18 OS=Homo sapiens GN=MCAM PE=1 SV=2	MUC18_HUMAN	MUC18	72 kDa	0.96	1	[]				0	58	109	72	239	#DIV/0!	29	152	51	232	#DIV/0!
1367	Ras-related protein Rab-14 OS=Homo sapiens GN=RAB14 PE=1 SV=4	RAB14_HUMAN	RAB14	24 kDa	0.82	1.2	[]		0		0	161	68	11	240	#DIV/0!	191	72	25	288	#DIV/0!
405	Coxsackievirus and adenovirus receptor OS=Homo sapiens GN=CXADR PE=1 SV=1	CXAR_HUMAN	CXAR	40 kDa	0.39	0.6	[]				0	135	72	36	243	#DIV/0!	38	85	19	142	#DIV/0!
126	Sorting nexin-2 OS=Homo sapiens GN=SNX2 PE=1 SV=2	SNX2_HUMAN	SNX2	58 kDa	0.27	0.6	[]			0	0	104	104	36	244	#DIV/0!	62	62	16	140	#DIV/0!
257	Protein LAP2 OS=Homo sapiens GN=ERBB2IP PE=1 SV=2	LAP2_HUMAN	LAP2	158 kDa	0.36	0.5	[]	0			0	131	96	19	246	#DIV/0!	48	73	7	128	#DIV/0!
1212	C-Jun-amino-terminal kinase-interacting protein 4 OS=Homo sapiens GN=SPAG9 PE=1 SV=4	JIP4_HUMAN	JIP4	146 kDa	0.74	1.4	[]	0	0	0	0	188	51	9	248	#DIV/0!	232	92	13	337	#DIV/0!
1202	HLA class I histocompatibility antigen, A-3 alpha chain OS=Homo sapiens GN=HLA-A PE=1 SV=2	1A03_HUMAN	1A03	41 kDa	0.74	0.8	[]				0	145	75	30	250	#DIV/0!	82	105	17	204	#DIV/0!
1170	PDZ domain-containing protein 8 OS=Homo sapiens GN=PDZD8 PE=1 SV=1	PDZD8_HUMAN	PDZD8	129 kDa	0.72	0.8	[]	0	0		0	107	142	19	268	#DIV/0!	60	134	16	210	#DIV/0!
1210	Microtubule-associated protein 4 OS=Homo sapiens GN=MAP4 PE=1 SV=3	MAP4_HUMAN	MAP4	121 kDa	0.74	0.8	[]	0		0	0	72	177	22	271	#DIV/0!	115	34	67	216	#DIV/0!
861	Dolichyl-diphosphooligosaccharide--protein glycosyltransferase subunit STT3B OS=Homo sapiens GN=STT3B PE=1 SV=1	STT3B_HUMAN	STT3B	94 kDa	0.57	1.5	[]		0		0	147	100	24	271	#DIV/0!	147	231	22	400	#DIV/0!
1652	Membrane-associated progesterone receptor component 2 OS=Homo sapiens GN=PGRMC2 PE=1 SV=1	PGRC2_HUMAN	PGRC2	24 kDa	1	1	[]	0			0	167	53	54	274	#DIV/0!	128	76	70	274	#DIV/0!
1316	T-complex protein 1 subunit beta OS=Homo sapiens GN=CCT2 PE=1 SV=4	TCPB_HUMAN	TCPB	57 kDa	0.79	1.3	[]	0	0	0	0	180	50	45	275	#DIV/0!	317	10	39	366	#DIV/0!
1094	Transferrin receptor protein 1 OS=Homo sapiens GN=TFRC PE=1 SV=2	TFR1_HUMAN	TFR1	85 kDa	0.68	0.8	[]	0			0	171	73	33	277	#DIV/0!	95	92	28	215	#DIV/0!
1199	CD2-associated protein OS=Homo sapiens GN=CD2AP PE=1 SV=1	CD2AP_HUMAN	CD2AP	71 kDa	0.73	1.2	[]	0	0	0	0	142	101	35	278	#DIV/0!	137	142	47	326	#DIV/0!
53	Liprin-beta-1 OS=Homo sapiens GN=PPFIBP1 PE=1 SV=2	LIPB1_HUMAN	LIPB1	114 kDa	0.16	0.2	[]	0	0	0	0	178	55	45	278	#DIV/0!	20	30	2	52	#DIV/0!
1394	Sodium bicarbonate cotransporter 3 OS=Homo sapiens GN=SLC4A7 PE=1 SV=2	S4A7_HUMAN	S4A7	136 kDa	0.84	0.9	[]	0	0	0	0	134	115	30	279	#DIV/0!	72	157	16	245	#DIV/0!
995	Tyrosine-protein kinase Yes OS=Homo sapiens GN=YES1 PE=1 SV=3	YES_HUMAN	YES	61 kDa	0.64	0.9	[]	0			0	132	83	64	279	#DIV/0!	90	113	55	258	#DIV/0!
201	Neurogenic locus notch homolog protein 1 OS=Homo sapiens GN=NOTCH1 PE=1 SV=4	NOTC1_HUMAN	NOTC1	272 kDa	0.33	0.4	[]	0			0	189	34	57	280	#DIV/0!	56	48	7	111	#DIV/0!
127	Centrosomal protein of 55 kDa OS=Homo sapiens GN=CEP55 PE=1 SV=3	CEP55_HUMAN	CEP55	54 kDa	0.27	0.3	[]	0	0	0	0	187	42	54	283	#DIV/0!	57	32	10	99	#DIV/0!
1351	Synaptosomal-associated protein 23 OS=Homo sapiens GN=SNAP23 PE=1 SV=1	SNP23_HUMAN	SNP23	23 kDa	0.81	0.7	[]	0			0	272	6	8	286	#DIV/0!	60	144	7	211	#DIV/0!
111	Pseudopodium-enriched atypical kinase 1 OS=Homo sapiens GN=PEAK1 PE=1 SV=4	PEAK1_HUMAN	PEAK1	193 kDa	0.26	0.2	[]	0	0		0	198	70	20	288	#DIV/0!	20	49	1	70	#DIV/0!
822	Brain-specific angiogenesis inhibitor 1-associated protein 2 OS=Homo sapiens GN=BAIAP2 PE=1 SV=1	BAIP2_HUMAN	BAIP2	61 kDa	0.55	0.7	[]	0	0	0	0	143	115	32	290	#DIV/0!	36	131	33	200	#DIV/0!
112	Nectin-2 OS=Homo sapiens GN=PVRL2 PE=1 SV=1	PVRL2_HUMAN	PVRL2	58 kDa	0.26	0.6	[]	0			0	130	104	68	302	#DIV/0!	54	105	31	190	#DIV/0!
662	Occludin OS=Homo sapiens GN=OCLN PE=1 SV=1	OCLN_HUMAN	OCLN	59 kDa	0.48	0.6	[]				0	196	92	16	304	#DIV/0!	44	99	31	174	#DIV/0!
1072	Ras-related protein Rab-1B OS=Homo sapiens GN=RAB1B PE=1 SV=1	RAB1B_HUMAN	RAB1B	22 kDa	0.67	1.3	[]				0	174	102	29	305	#DIV/0!	220	116	49	385	#DIV/0!
28	Cdc42 effector protein 1 OS=Homo sapiens GN=CDC42EP1 PE=1 SV=1	BORG5_HUMAN	BORG5	40 kDa	0.11	0.3	[]		0		0	152	97	58	307	#DIV/0!	9	75	11	95	#DIV/0!
1043	Plasma membrane calcium-transporting ATPase 4 OS=Homo sapiens GN=ATP2B4 PE=1 SV=2	AT2B4_HUMAN	AT2B4	138 kDa	0.66	0.8	[]	0		0	0	143	119	47	309	#DIV/0!	129	92		221	#DIV/0!
1242	Large neutral amino acids transporter small subunit 1 OS=Homo sapiens GN=SLC7A5 PE=1 SV=2	LAT1_HUMAN	LAT1	55 kDa	0.76	0.7	[]				0	274	27	8	309	#DIV/0!	177	23	8	208	#DIV/0!
787	Ribosome-binding protein 1 OS=Homo sapiens GN=RRBP1 PE=1 SV=4	RRBP1_HUMAN	RRBP1	152 kDa	0.54	0.5	[]	0	0	0	0	213	100	3	316	#DIV/0!	136	1	31	168	#DIV/0!
435	Protein numb homolog OS=Homo sapiens GN=NUMB PE=1 SV=2	NUMB_HUMAN	NUMB	71 kDa	0.4	0.6	[]		0		0	154	122	41	317	#DIV/0!	48	118	29	195	#DIV/0!
418	Unconventional myosin-XVIIIa OS=Homo sapiens GN=MYO18A PE=1 SV=3	MY18A_HUMAN	MY18A	233 kDa	0.4	0.4	[]	0	0	0	0	188	121	9	318	#DIV/0!	123	6	2	131	#DIV/0!
412	Golgin subfamily A member 5 OS=Homo sapiens GN=GOLGA5 PE=1 SV=3	GOGA5_HUMAN	GOGA5	83 kDa	0.39	0.6	[]	0			0	186	95	38	319	#DIV/0!	90	70	23	183	#DIV/0!
169	Rho GTPase-activating protein 1 OS=Homo sapiens GN=ARHGAP1 PE=1 SV=1	RHG01_HUMAN	RHG01	50 kDa	0.31	0.5	[]			0	0	180	98	41	319	#DIV/0!	51	92	16	159	#DIV/0!
1636	Vesicle-trafficking protein SEC22b OS=Homo sapiens GN=SEC22B PE=1 SV=4	SC22B_HUMAN	SC22B	25 kDa	0.99	1	[]				0	169	112	45	326	#DIV/0!	172	123	28	323	#DIV/0!
1165	Filamin-B OS=Homo sapiens GN=FLNB PE=1 SV=2	FLNB_HUMAN	FLNB	278 kDa	0.72	1.4	[]	0		0	0	119	172	36	327	#DIV/0!	299	81	82	462	#DIV/0!
854	Sodium-coupled neutral amino acid transporter 1 OS=Homo sapiens GN=SLC38A1 PE=1 SV=1	S38A1_HUMAN	S38A1	54 kDa	0.57	0.7	[]				0	93	179	63	335	#DIV/0!	57	148	40	245	#DIV/0!
927	Coiled-coil domain-containing protein 47 OS=Homo sapiens GN=CCDC47 PE=1 SV=1	CCD47_HUMAN	CCD47	56 kDa	0.61	0.7	[]	0	0	0	0	178	129	38	345	#DIV/0!	57	166	22	245	#DIV/0!
103	Septin-7 OS=Homo sapiens GN=SEPT7 PE=1 SV=2	SEPT7_HUMAN	2019-09-07	51 kDa	0.24	0.5	[]	0			0	157	136	58	351	#DIV/0!	41	116	25	182	#DIV/0!
1285	Torsin-1A-interacting protein 1 OS=Homo sapiens GN=TOR1AIP1 PE=1 SV=2	TOIP1_HUMAN	TOIP1	66 kDa	0.77	1.1	[]	0			0	157	128	66	351	#DIV/0!	111	226	65	402	#DIV/0!
1328	Protein sprouty homolog 4 OS=Homo sapiens GN=SPRY4 PE=1 SV=2	SPY4_HUMAN	SPY4	33 kDa	0.8	0.8	[]	0			0	218	112	26	356	#DIV/0!	146	130	24	300	#DIV/0!
1247	Oxysterol-binding protein-related protein 11 OS=Homo sapiens GN=OSBPL11 PE=1 SV=2	OSB11_HUMAN	OSB11	84 kDa	0.76	0.7	[]	0		0	0	303	37	19	359	#DIV/0!	136	118	5	259	#DIV/0!
1626	STE20-like serine/threonine-protein kinase OS=Homo sapiens GN=SLK PE=1 SV=1	SLK_HUMAN	SLK	143 kDa	0.98	1	[]	0		0	0	183	148	31	362	#DIV/0!	229	119	20	368	#DIV/0!
133	182 kDa tankyrase-1-binding protein OS=Homo sapiens GN=TNKS1BP1 PE=1 SV=4	TB182_HUMAN	TB182	182 kDa	0.28	0.3	[]	0	0	0	0	254	81	31	366	#DIV/0!	78	13	11	102	#DIV/0!
1539	Coronin-1B OS=Homo sapiens GN=CORO1B PE=1 SV=1	COR1B_HUMAN	COR1B	54 kDa	0.93	1	[]	0	0	0	0	182	131	57	370	#DIV/0!	115	157	86	358	#DIV/0!
1521	Kinesin-1 heavy chain OS=Homo sapiens GN=KIF5B PE=1 SV=1	KINH_HUMAN	KINH	110 kDa	0.92	0.9	[]	0	0	0	0	201	111	64	376	#DIV/0!	266	19	62	347	#DIV/0!
1296	Ras-related protein Rab-6A OS=Homo sapiens GN=RAB6A PE=1 SV=3	RAB6A_HUMAN	RAB6A	24 kDa	0.78	0.9	[]	0			0	214	125	39	378	#DIV/0!	128	149	48	325	#DIV/0!
96	Roundabout homolog 1 OS=Homo sapiens GN=ROBO1 PE=1 SV=1	ROBO1_HUMAN	ROBO1	181 kDa	0.23	0.4	[]			0	0	216	135	27	378	#DIV/0!	55	67	14	136	#DIV/0!
1365	CD166 antigen OS=Homo sapiens GN=ALCAM PE=1 SV=2	CD166_HUMAN	CD166	65 kDa	0.82	0.9	[]	0	0		0	176	140	64	380	#DIV/0!	128	167	50	345	#DIV/0!
614	Lipopolysaccharide-responsive and beige-like anchor protein OS=Homo sapiens GN=LRBA PE=1 SV=4	LRBA_HUMAN	LRBA	319 kDa	0.46	0.4	[]	0	0	0	0	288	48	47	383	#DIV/0!	141	11	5	157	#DIV/0!
1421	Solute carrier family 2, facilitated glucose transporter member 14 OS=Homo sapiens GN=SLC2A14 PE=2 SV=1	GTR14_HUMAN	GTR14	56 kDa	0.85	1.1	[]	0		0	0	120	176	96	392	#DIV/0!	111	245	70	426	#DIV/0!
1374	Basigin OS=Homo sapiens GN=BSG PE=1 SV=2	BASI_HUMAN	BASI	42 kDa	0.83	0.9	[]	0			0	189	127	77	393	#DIV/0!	169	142	48	359	#DIV/0!
560	Metalloreductase STEAP3 OS=Homo sapiens GN=STEAP3 PE=1 SV=2	STEA3_HUMAN	STEA3	55 kDa	0.44	0.8	[]	0			0	168	137	91	396	#DIV/0!	100	151	49	300	#DIV/0!
97	Brefeldin A-inhibited guanine nucleotide-exchange protein 3 OS=Homo sapiens GN=ARFGEF3 PE=1 SV=3	BIG3_HUMAN	BIG3	241 kDa	0.23	0.3	[]	0	0	0	0	230	140	29	399	#DIV/0!	96	24	8	128	#DIV/0!
56	Rho-associated protein kinase 2 OS=Homo sapiens GN=ROCK2 PE=1 SV=4	ROCK2_HUMAN	ROCK2	161 kDa	0.16	0.2	[]	0	0	0	0	143	220	36	399	#DIV/0!	83	1	8	92	#DIV/0!
887	Sorting nexin-1 OS=Homo sapiens GN=SNX1 PE=1 SV=3	SNX1_HUMAN	SNX1	59 kDa	0.59	0.7	[]	0			0	200	151	53	404	#DIV/0!	154	124	22	300	#DIV/0!
390	Synaptosomal-associated protein 29 OS=Homo sapiens GN=SNAP29 PE=1 SV=1	SNP29_HUMAN	SNP29	29 kDa	0.38	0.6	[]				0	211	160	40	411	#DIV/0!	73	133	34	240	#DIV/0!
476	Ankycorbin OS=Homo sapiens GN=RAI14 PE=1 SV=2	RAI14_HUMAN	RAI14	110 kDa	0.41	0.5	[]	0	0	0	0	261	92	60	413	#DIV/0!	165	11	18	194	#DIV/0!
809	Brain acid soluble protein 1 OS=Homo sapiens GN=BASP1 PE=1 SV=2	BASP1_HUMAN	BASP1	23 kDa	0.55	0.8	[]	0		0	0	167	175	76	418	#DIV/0!	87	178	58	323	#DIV/0!
849	Disks large homolog 1 OS=Homo sapiens GN=DLG1 PE=1 SV=2	DLG1_HUMAN	DLG1	100 kDa	0.57	0.8	[]	0			0	146	182	101	429	#DIV/0!	129	162	72	363	#DIV/0!
1067	Lamin-B receptor OS=Homo sapiens GN=LBR PE=1 SV=2	LBR_HUMAN	LBR	71 kDa	0.67	1.3	[]				0	234	147	53	434	#DIV/0!	217	287	50	554	#DIV/0!
1442	Fermitin family homolog 2 OS=Homo sapiens GN=FERMT2 PE=1 SV=1	FERM2_HUMAN	FERM2	78 kDa	0.87	0.9	[]		0		0	280	121	46	447	#DIV/0!	134	231	35	400	#DIV/0!
1619	Vesicle-associated membrane protein-associated protein B/C OS=Homo sapiens GN=VAPB PE=1 SV=3	VAPB_HUMAN	VAPB	27 kDa	0.97	1	[]	0			0	244	156	68	468	#DIV/0!	137	206	131	474	#DIV/0!
117	MAP/microtubule affinity-regulating kinase 3 OS=Homo sapiens GN=MARK3 PE=1 SV=4	MARK3_HUMAN	MARK3	84 kDa	0.26	0.5	[]	0			0	250	190	65	505	#DIV/0!	58	149	54	261	#DIV/0!
40	Liprin-alpha-1 OS=Homo sapiens GN=PPFIA1 PE=1 SV=1	LIPA1_HUMAN	LIPA1	136 kDa	0.14	0.3	[]	0	0	0	0	264	180	62	506	#DIV/0!	106	21	9	136	#DIV/0!
271	Eukaryotic translation initiation factor 4 gamma 1 OS=Homo sapiens GN=EIF4G1 PE=1 SV=4	IF4G1_HUMAN	IF4G1	175 kDa	0.37	2.2	[]	0	0	0	0	219	173	121	513	#DIV/0!	755	149	202	1106	#DIV/0!
738	Golgi reassembly-stacking protein 2 OS=Homo sapiens GN=GORASP2 PE=1 SV=3	GORS2_HUMAN	GORS2	47 kDa	0.51	0.8	[]		0		0	233	169	112	514	#DIV/0!	116	217	54	387	#DIV/0!
378	Neurogenic locus notch homolog protein 2 OS=Homo sapiens GN=NOTCH2 PE=1 SV=3	NOTC2_HUMAN	NOTC2	265 kDa	0.38	0.6	[]	0	0	0	0	260	174	81	515	#DIV/0!	121	162	50	333	#DIV/0!
597	Alpha-adducin OS=Homo sapiens GN=ADD1 PE=1 SV=2	ADDA_HUMAN	ADDA	81 kDa	0.45	0.5	[]	0	0		0	349	90	76	515	#DIV/0!	186	43	31	260	#DIV/0!
1014	Clathrin interactor 1 OS=Homo sapiens GN=CLINT1 PE=1 SV=1	EPN4_HUMAN	EPN4	68 kDa	0.65	0.7	[]	0			0	298	164	53	515	#DIV/0!	131	234	7	372	#DIV/0!
873	Secretory carrier-associated membrane protein 1 OS=Homo sapiens GN=SCAMP1 PE=1 SV=2	SCAM1_HUMAN	SCAM1	38 kDa	0.58	0.7	[]				0	241	238	44	523	#DIV/0!	145	180	67	392	#DIV/0!
73	Chondroitin sulfate proteoglycan 4 OS=Homo sapiens GN=CSPG4 PE=1 SV=2	CSPG4_HUMAN	CSPG4	251 kDa	0.19	0.5	[]	0		0	0	228	228	70	526	#DIV/0!	120	95	39	254	#DIV/0!
1293	Monocarboxylate transporter 1 OS=Homo sapiens GN=SLC16A1 PE=1 SV=3	MOT1_HUMAN	MOT1	54 kDa	0.78	0.8	[]			0	0	322	148	61	531	#DIV/0!	193	219	32	444	#DIV/0!
1538	Transgelin-2 OS=Homo sapiens GN=TAGLN2 PE=1 SV=3	TAGL2_HUMAN	TAGL2	22 kDa	0.93	1	[]	0	0	0	0	288	185	65	538	#DIV/0!	260	177	77	514	#DIV/0!
1012	Gamma-adducin OS=Homo sapiens GN=ADD3 PE=1 SV=1	ADDG_HUMAN	ADDG	79 kDa	0.65	0.8	[]	0			0	252	218	78	548	#DIV/0!	138	223	89	450	#DIV/0!
1536	Double-strand break repair protein MRE11A OS=Homo sapiens GN=MRE11A PE=1 SV=3	MRE11_HUMAN	MRE11	81 kDa	0.93	1	[]	0	0	0	0	285	180	89	554	#DIV/0!	282	236	62	580	#DIV/0!
1160	Calnexin OS=Homo sapiens GN=CANX PE=1 SV=2	CALX_HUMAN	CALX	68 kDa	0.71	1.3	[]	0	0	0	0	347	139	78	564	#DIV/0!	485	197	59	741	#DIV/0!
1051	Plasma membrane calcium-transporting ATPase 1 OS=Homo sapiens GN=ATP2B1 PE=1 SV=3	AT2B1_HUMAN	AT2B1	139 kDa	0.66	0.8	[]			0	0	260	240	67	567	#DIV/0!	228	186	33	447	#DIV/0!
1641	CD44 antigen OS=Homo sapiens GN=CD44 PE=1 SV=3	CD44_HUMAN	CD44	82 kDa	0.99	1	[]	0			0	228	241	129	598	#DIV/0!	164	349	88	601	#DIV/0!
1649	Myosin-9 OS=Homo sapiens GN=MYH9 PE=1 SV=4	MYH9_HUMAN	MYH9	227 kDa	1	1	[]	0	0	0	0	308	231	74	613	#DIV/0!	553	19	39	611	#DIV/0!
1627	Vesicle-associated membrane protein-associated protein A OS=Homo sapiens GN=VAPA PE=1 SV=3	VAPA_HUMAN	VAPA	28 kDa	0.98	1	[]	0		0	0	348	213	59	620	#DIV/0!	295	233	100	628	#DIV/0!
1268	Multidrug resistance-associated protein 1 OS=Homo sapiens GN=ABCC1 PE=1 SV=3	MRP1_HUMAN	MRP1	172 kDa	0.77	0.9	[]	0		0	0	275	286	71	632	#DIV/0!	210	276	54	540	#DIV/0!
20	Thyroid receptor-interacting protein 11 OS=Homo sapiens GN=TRIP11 PE=1 SV=3	TRIPB_HUMAN	TRIPB	228 kDa	0.1	0.2	[]	0	0	0	0	368	183	91	642	#DIV/0!	73	26	12	111	#DIV/0!
209	Septin-9 OS=Homo sapiens GN=SEPT9 PE=1 SV=2	SEPT9_HUMAN	2019-09-09	65 kDa	0.34	0.7	[]	0	0	0	0	293	270	117	680	#DIV/0!	161	210	100	471	#DIV/0!
63	Pleckstrin homology domain-containing family A member 5 OS=Homo sapiens GN=PLEKHA5 PE=1 SV=1	PKHA5_HUMAN	PKHA5	127 kDa	0.17	0.5	[]	0	0		0	254	335	111	700	#DIV/0!	127	162	41	330	#DIV/0!
599	Cation-independent mannose-6-phosphate receptor OS=Homo sapiens GN=IGF2R PE=1 SV=3	MPRI_HUMAN	MPRI	274 kDa	0.45	0.7	[]	0	0	0	0	365	267	123	755	#DIV/0!	202	260	66	528	#DIV/0!
1206	Extended synaptotagmin-1 OS=Homo sapiens GN=ESYT1 PE=1 SV=1	ESYT1_HUMAN	ESYT1	123 kDa	0.74	1.2	[]	0			0	393	168	197	758	#DIV/0!	459	305	123	887	#DIV/0!
102	Serine/threonine-protein kinase MARK2 OS=Homo sapiens GN=MARK2 PE=1 SV=2	MARK2_HUMAN	MARK2	88 kDa	0.24	0.6	[]	0	0		0	325	323	134	782	#DIV/0!	135	232	114	481	#DIV/0!
479	Desmoglein-2 OS=Homo sapiens GN=DSG2 PE=1 SV=2	DSG2_HUMAN	DSG2	122 kDa	0.41	0.6	[]	0	0	0	0	313	342	129	784	#DIV/0!	159	306	42	507	#DIV/0!
938	Protein transport protein Sec16A OS=Homo sapiens GN=SEC16A PE=1 SV=3	SC16A_HUMAN	SC16A	234 kDa	0.61	0.7	[]	0		0	0	415	304	73	792	#DIV/0!	370	91	107	568	#DIV/0!
920	Carboxypeptidase D OS=Homo sapiens GN=CPD PE=1 SV=2	CBPD_HUMAN	CBPD	153 kDa	0.6	0.7	[]	0			0	182	430	180	792	#DIV/0!	86	393	92	571	#DIV/0!
1490	Src substrate cortactin OS=Homo sapiens GN=CTTN PE=1 SV=2	SRC8_HUMAN	SRC8	62 kDa	0.9	1.1	[]	0	0	0	0	451	308	63	822	#DIV/0!	348	420	114	882	#DIV/0!
626	Myristoylated alanine-rich C-kinase substrate OS=Homo sapiens GN=MARCKS PE=1 SV=4	MARCS_HUMAN	MARCS	32 kDa	0.46	0.8	[]	0			0	284	356	184	824	#DIV/0!	201	322	109	632	#DIV/0!
218	Kinectin OS=Homo sapiens GN=KTN1 PE=1 SV=1	KTN1_HUMAN	KTN1	156 kDa	0.34	0.5	[]	0	0	0	0	291	464	106	861	#DIV/0!	305	53	75	433	#DIV/0!
1547	Ephrin type-A receptor 2 OS=Homo sapiens GN=EPHA2 PE=1 SV=2	EPHA2_HUMAN	EPHA2	108 kDa	0.93	1	[]	0			0	493	219	149	861	#DIV/0!	440	296	85	821	#DIV/0!
1571	Thioredoxin-related transmembrane protein 1 OS=Homo sapiens GN=TMX1 PE=1 SV=1	TMX1_HUMAN	TMX1	32 kDa	0.95	1	[]		0		0	380	404	84	868	#DIV/0!	312	334	198	844	#DIV/0!
193	Catenin delta-1 OS=Homo sapiens GN=CTNND1 PE=1 SV=1	CTND1_HUMAN	CTND1	108 kDa	0.32	0.7	[]	0	0		0	486	443	216	1145	#DIV/0!	271	375	128	774	#DIV/0!
1565	Integrin beta-1 OS=Homo sapiens GN=ITGB1 PE=1 SV=2	ITB1_HUMAN	ITB1	88 kDa	0.94	1	[]	0			0	533	413	220	1166	#DIV/0!	392	560	180	1132	#DIV/0!
1605	Protein 4.1 OS=Homo sapiens GN=EPB41 PE=1 SV=4	41_HUMAN	41	97 kDa	0.97	1	[]	0	0	0	0	489	516	311	1316	#DIV/0!	285	792	212	1289	#DIV/0!
630	Cytoskeleton-associated protein 4 OS=Homo sapiens GN=CKAP4 PE=1 SV=2	CKAP4_HUMAN	CKAP4	66 kDa	0.47	0.8	[]	0			0	598	621	283	1502	#DIV/0!	355	526	315	1196	#DIV/0!
1445	Neutral amino acid transporter B(0) OS=Homo sapiens GN=SLC1A5 PE=1 SV=2	AAAT_HUMAN	AAAT	57 kDa	0.87	0.9	[]	0			0	475	715	326	1516	#DIV/0!	412	730	283	1425	#DIV/0!
1535	Protein ERGIC-53 OS=Homo sapiens GN=LMAN1 PE=1 SV=2	LMAN1_HUMAN	LMAN1	58 kDa	0.93	1	[]	0	0	0	0	651	532	406	1589	#DIV/0!	504	644	412	1560	#DIV/0!
60	Afadin OS=Homo sapiens GN=MLLT4 PE=1 SV=3	AFAD_HUMAN	AFAD	207 kDa	0.17	0.5	[]	0	0	0	0	701	697	238	1636	#DIV/0!	380	270	149	799	#DIV/0!
958	4F2 cell-surface antigen heavy chain OS=Homo sapiens GN=SLC3A2 PE=1 SV=3	4F2_HUMAN	4F2	68 kDa	0.62	0.9	[]	0		0	0	884	760	689	2333	#DIV/0!	582	1051	359	1992	#DIV/0!
1129	Band 4.1-like protein 3 OS=Homo sapiens GN=EPB41L3 PE=1 SV=2	E41L3_HUMAN	E41L3	121 kDa	0.7	0.9	[]	0	0	0	0	1308	1131	660	3099	#DIV/0!	812	1407	461	2680	#DIV/0!
781	CD63 antigen OS=Homo sapiens GN=CD63 PE=1 SV=2	CD63_HUMAN	CD63	26 kDa	0.53	1.2	[]	0			0	1454	1273	962	3689	#DIV/0!	1702	1806	859	4367	#DIV/0!
263	A-kinase anchor protein 12 OS=Homo sapiens GN=AKAP12 PE=1 SV=4	AKA12_HUMAN	AKA12	191 kDa	0.37	0.5	[]	0	0	0	0	2500	865	567	3932	#DIV/0!	1234	483	122	1839	#DIV/0!
END OF FILE
